# Supplementary material for: The most sustainable high entropy alloys for the future
Source: Research Square preprint supplement (doi:10.21203/rs.3.rs-3553470/v1), 2023-12-11
Supplement: Supplementary file 1 [file 474be624e517c48b37cb1418.xlsx]

## Sheet: Feuil1
Alloy	Decile number					Supply Risk Score
	Companionability	CO2 Footprint	Supply Risk	Production	Reserve
Al-Mo-Os-Rh-Ru	9	8	9	10	10	46
Al-Ir-Os-Re-Ru	10	6	10	10	10	46
Al-Ir-Os-Rh-V	9	8	10	10	9	46
Al-Ir-Os-Rh-Zr	10	8	9	10	9	46
Al-Ir-Os-Ru-Sc	10	6	10	10	10	46
Al-Co-Os-Pt-Ru	7	10	10	9	10	46
Al-Hf-Ir-Os-Pt	8	10	9	10	9	46
Al-Hf-Ir-Os-Rh	10	8	9	10	9	46
Al-Hf-Ir-Os-Ru	10	6	10	10	10	46
Al-Os-Pd-Pt-Ru	8	10	9	9	10	46
As-Nb-Os-Pd-Rh	10	8	9	10	9	46
Al-Os-Pt-Re-Rh	8	10	8	10	10	46
Al-Os-Pt-Ru-V	7	10	10	9	10	46
Al-Os-Pt-Ru-Zr	8	10	9	9	10	46
Al-Os-Re-Rh-Sc	10	8	8	10	10	46
Al-Os-Rh-Ru-Ta	8	8	10	10	10	46
As-Ni-Os-Pt-Ru	8	10	9	9	10	46
As-Hf-Ir-Os-Rh	10	8	9	10	9	46
As-Hf-Ir-Os-Ru	10	6	10	10	10	46
As-Fe-Ir-Os-Rh	10	8	9	10	9	46
As-Fe-Os-Pt-Ru	8	10	9	9	10	46
As-Os-Pt-Rh-Ta	9	10	8	10	9	46
As-Os-Pt-Rh-Ti	8	10	9	10	9	46
As-Os-Re-Rh-V	10	8	8	10	10	46
As-Ir-Mo-Os-Rh	10	8	9	10	9	46
As-Ir-Nb-Os-Re	10	6	10	10	10	46
As-Ir-Os-Pt-Ta	9	10	9	9	9	46
As-Ir-Os-Pt-Ti	8	10	10	9	9	46
Co-Os-Pd-Re-Rh	10	8	8	10	10	46
Co-Os-Pd-Rh-V	10	8	9	10	9	46
Cr-Os-Pd-Pt-Ru	8	10	9	9	10	46
Co-Os-Pt-Re-Ta	9	10	7	10	10	46
Co-Os-Pt-Rh-Zn	8	10	9	10	9	46
Co-Os-Pt-Ru-Si	7	10	10	9	10	46
Co-Os-Pt-Ru-Ti	7	10	10	9	10	46
Co-Os-Re-Rh-Ti	10	8	8	10	10	46
Cr-Os-Pt-Ru-V	7	10	10	9	10	46
Co-Os-Rh-Ta-V	10	8	9	10	9	46
Cr-Os-Rh-Ru-Ta	9	8	9	10	10	46
Cr-Os-Rh-Ru-W	8	8	10	10	10	46
Co-Mn-Os-Pt-Rh	8	10	9	10	9	46
Co-Cr-Os-Pt-Ru	7	10	10	9	10	46
Fe-Ir-Os-Pd-Rh	10	8	9	10	9	46
Fe-Ir-Os-Pt-Re	8	10	8	10	10	46
Co-Ir-Nb-Os-Re	10	6	10	10	10	46
Fe-Ge-Os-Rh-W	8	8	10	10	10	46
Cu-Os-Pt-Ru-V	8	10	9	9	10	46
Cr-Ge-Nb-Os-Rh	8	8	10	10	10	46
Cr-Mo-Os-Rh-Ru	9	8	9	10	10	46
Co-Ir-Os-Pt-W	8	10	10	9	9	46
Co-Ir-Os-Re-Ru	10	6	10	10	10	46
Co-Ir-Os-Re-W	10	6	10	10	10	46
Fe-Ga-Ir-Os-Pt	8	10	10	9	9	46
Fe-Ga-Ir-Os-Re	10	6	10	10	10	46
Cu-Os-Rh-Ru-Ta	9	8	9	10	10	46
Cr-Ir-Os-Pd-Rh	10	8	9	10	9	46
Cr-Ir-Os-Re-Ru	10	6	10	10	10	46
Ga-Hf-Ir-Os-Re	10	6	10	10	10	46
Ga-Hf-Ir-Os-Ru	10	6	10	10	10	46
Cr-Ga-Ir-Os-Re	10	6	10	10	10	46
Cr-Nb-Os-Rh-Ru	8	8	10	10	10	46
Ge-Hf-Ir-Nb-Os	10	6	10	10	10	46
Co-Ga-Ir-Os-Re	10	6	10	10	10	46
Fe-Mg-Os-Rh-Ru	8	8	10	10	10	46
Ge-Hf-Ir-Os-Ru	10	6	10	10	10	46
Ge-Hf-Ir-Os-V	10	6	10	10	10	46
Co-Nb-Os-Pt-Re	7	10	9	10	10	46
Co-Nb-Os-Pt-Rh	7	10	10	10	9	46
Co-Nb-Os-Pt-Ru	7	10	10	9	10	46
Cu-Ir-Os-Pd-Rh	10	8	9	10	9	46
Cr-Hf-Ir-Os-Ru	10	6	10	10	10	46
Cu-Ir-Os-Rh-V	10	8	9	10	9	46
Hf-Ir-Ni-Os-Rh	10	8	9	10	9	46
Hf-Ir-Ni-Os-Ru	10	6	10	10	10	46
Hf-Ir-Os-Pt-Ta	9	10	8	10	9	46
Hf-Ir-Os-Re-Ru	10	6	10	10	10	46
Hf-Ir-Os-Rh-Ta	10	8	9	10	9	46
Co-Hf-Ir-Os-Ru	10	6	10	10	10	46
Hf-Ir-Os-Rh-Ti	10	8	9	10	9	46
Ga-Hf-Nb-Os-Rh	10	7	10	10	9	46
Hf-Ir-Os-Ru-Si	10	6	10	10	10	46
Hf-Ir-Os-Ru-Ta	10	6	10	10	10	46
Hf-Ir-Os-Ru-Ti	10	6	10	10	10	46
Hf-Ir-Os-Ru-V	10	6	10	10	10	46
Hf-Ir-Os-Ru-W	10	6	10	10	10	46
Ge-Os-Pd-Pt-Ta	9	10	8	9	10	46
Ge-Os-Pd-Rh-Ta	10	8	8	10	10	46
Co-Ga-Nb-Os-Rh	10	7	10	10	9	46
Ga-Os-Pd-Ru-Sc	10	6	10	10	10	46
Ge-Os-Pt-Re-Ta	9	10	7	10	10	46
Ge-Os-Pt-Ta-V	8	10	9	9	10	46
Ga-Hf-Os-Rh-Ta	10	8	9	10	9	46
Ge-Os-Re-Rh-Ta	10	8	8	10	10	46
Ga-Os-Pt-Ta-V	8	10	10	9	9	46
Co-Ni-Os-Pt-Ru	7	10	10	9	10	46
Ga-Os-Pt-Ta-Zr	9	10	9	9	9	46
Ga-Os-Pt-V-W	8	10	10	9	9	46
Fe-Hf-Os-Rh-Ru	10	8	8	10	10	46
Cu-Nb-Os-Rh-Ru	8	8	10	10	10	46
Ge-Os-Rh-Si-W	8	8	10	10	10	46
Ge-Os-Rh-Ti-W	8	8	10	10	10	46
Ir-Os-Pd-Re-Ru	10	6	10	10	10	46
Ir-Os-Pd-Rh-Ta	10	8	9	10	9	46
Ga-Os-Rh-Ta-W	9	8	10	10	9	46
Ga-Os-Rh-Ta-Zr	10	8	9	10	9	46
Ga-Os-Rh-V-W	10	7	10	10	9	46
Ga-Os-Rh-V-Zn	10	7	10	10	9	46
Hf-Nb-Os-Pt-Rh	8	10	9	10	9	46
Hf-Nb-Os-Re-Rh	10	8	8	10	10	46
Ir-Os-Pt-Ta-V	8	10	10	9	9	46
Ge-Hf-Os-Rh-Ta	10	8	8	10	10	46
Ir-Os-Pt-V-W	8	10	10	9	9	46
Ir-Os-Re-Ru-Si	10	6	10	10	10	46
Ir-Os-Re-Ru-Ta	10	6	10	10	10	46
Ir-Os-Re-Ru-Ti	10	6	10	10	10	46
Ir-Os-Re-Ru-V	10	6	10	10	10	46
Ir-Os-Re-Ru-W	10	6	10	10	10	46
Ir-Os-Re-Ru-Zn	10	6	10	10	10	46
Ir-Os-Re-Ru-Zr	10	6	10	10	10	46
Ir-Os-Re-Sc-W	10	6	10	10	10	46
Ir-Os-Re-V-W	10	6	10	10	10	46
Ir-Os-Rh-Si-V	9	8	10	10	9	46
Ir-Os-Rh-Ta-W	9	8	10	10	9	46
Ir-Os-Rh-Ta-Zr	10	8	9	10	9	46
Ir-Os-Rh-Ti-V	9	8	10	10	9	46
Ir-Os-Rh-Ti-Zr	10	8	9	10	9	46
Ir-Os-Ru-Sc-Si	10	6	10	10	10	46
Ir-Os-Ru-Sc-Ta	10	6	10	10	10	46
Ir-Os-Ru-Sc-Zn	10	6	10	10	10	46
Ga-Ir-Mn-Os-Re	10	6	10	10	10	46
Ni-Os-Pd-Pt-Ru	8	10	9	9	10	46
Ir-Mn-Os-Pd-Rh	10	8	9	10	9	46
Ir-Mn-Os-Pt-Re	8	10	8	10	10	46
Fe-Os-Pt-Re-Ru	8	10	8	10	10	46
Ir-Mn-Os-Re-Ru	10	6	10	10	10	46
Ni-Os-Pt-Re-Rh	8	10	8	10	10	46
Nb-Ni-Os-Rh-Ru	8	8	10	10	10	46
Ni-Os-Pt-Ru-V	7	10	10	9	10	46
Os-Pt-Ru-Si-V	7	10	10	9	10	46
Os-Pt-Ru-Ti-V	7	10	10	9	10	46
Ga-Ir-Mo-Os-Re	10	6	10	10	10	46
Ga-Ir-Mo-Os-Sc	10	6	10	10	10	46
Os-Pt-Ru-V-Zn	8	10	9	9	10	46
Fe-Os-Rh-Ru-Ta	9	8	9	10	10	46
Fe-Os-Rh-Ru-W	8	8	10	10	10	46
Fe-Os-Rh-Ru-Zr	10	8	8	10	10	46
Mn-Os-Pd-Pt-Ru	8	10	9	9	10	46
Ni-Os-Rh-Ru-Ta	9	8	9	10	10	46
Ni-Os-Rh-Ru-W	8	8	10	10	10	46
Mo-Ni-Os-Rh-Ru	9	8	9	10	10	46
Ga-Ir-Nb-Os-Pt	8	10	10	9	9	46
Ga-Ir-Nb-Os-Re	10	6	10	10	10	46
Ga-Ir-Nb-Os-Sc	10	6	10	10	10	46
Ge-Ir-Nb-Os-Re	10	6	10	10	10	46
Mn-Os-Pt-Re-Ru	8	10	8	10	10	46
Os-Re-Rh-W-Zr	10	8	8	10	10	46
Mn-Os-Rh-Ru-Ta	9	8	9	10	10	46
Ga-Ir-Ni-Os-Pt	8	10	10	9	9	46
Mn-Os-Rh-Ru-W	8	8	10	10	10	46
Ga-Ir-Ni-Os-Re	10	6	10	10	10	46
Ge-Mo-Os-Pt-V	9	10	8	9	10	46
Ge-Mo-Os-Rh-Si	9	8	9	10	10	46
Ge-Mo-Os-Rh-Ti	9	8	9	10	10	46
Os-Rh-Ru-Si-Ta	8	8	10	10	10	46
Os-Rh-Ru-Si-W	8	8	10	10	10	46
Os-Rh-Ru-Si-Zn	8	8	10	10	10	46
Os-Rh-Ru-Ta-Ti	8	8	10	10	10	46
Os-Rh-Ru-Ta-Zn	9	8	9	10	10	46
Os-Rh-Ru-Ti-W	8	8	10	10	10	46
Os-Rh-Ru-W-Zn	8	8	10	10	10	46
Os-Rh-Ru-Zn-Zr	10	8	8	10	10	46
Ga-Mo-Os-Rh-V	10	7	10	10	9	46
Ge-Ir-Os-Re-V	10	6	10	10	10	46
Ga-Ir-Os-Pt-Ti	8	10	10	9	9	46
Ga-Ir-Os-Re-Ru	10	6	10	10	10	46
Ga-Ir-Os-Re-Ta	10	6	10	10	10	46
Ga-Ir-Os-Re-Ti	10	6	10	10	10	46
Ga-Ir-Os-Re-V	10	6	10	10	10	46
Ga-Ir-Os-Re-W	10	6	10	10	10	46
Fe-Mo-Os-Rh-Ru	9	8	9	10	10	46
Ga-Ir-Os-Re-Zr	10	6	10	10	10	46
Ga-Ir-Os-Ru-Sc	10	6	10	10	10	46
Ga-Ir-Os-Sc-Ta	10	6	10	10	10	46
Mg-Nb-Os-Re-Rh	8	8	10	10	10	46
Mg-Nb-Os-Rh-Ru	8	8	10	10	10	46
Ga-Pt-Re-Rh-Ru	10	10	10	8	8	46
Ir-Mo-Nb-Os-Rh	9	8	10	10	9	46
Ir-Pt-Re-Rh-Ru	10	10	10	8	8	46
Nb-Os-Pd-Rh-V	9	8	10	10	9	46
Ir-Pt-Rh-Ru-Sc	10	10	10	8	8	46
Ge-Nb-Ni-Os-Rh	8	8	10	10	10	46
Mo-Os-Pd-Pt-Rh	9	10	8	10	9	46
Nb-Os-Pt-Re-V	7	10	9	10	10	46
Nb-Os-Pt-Rh-V	7	10	10	10	9	46
Nb-Os-Pt-Rh-Zr	8	10	9	10	9	46
Nb-Os-Pt-Ru-V	7	10	10	9	10	46
Ir-Mo-Os-Pd-Pt	9	10	9	9	9	46
Ir-Mo-Os-Pd-Rh	10	8	9	10	9	46
Ir-Mo-Os-Pt-V	9	10	9	9	9	46
Ir-Mo-Os-Re-Ru	10	6	10	10	10	46
Mo-Os-Pt-Re-Rh	9	10	7	10	10	46
Ir-Mo-Os-Rh-Si	9	8	10	10	9	46
Ir-Mo-Os-Rh-Ti	9	8	10	10	9	46
Ir-Mo-Os-Rh-W	9	8	10	10	9	46
Ir-Mo-Os-Rh-Zr	10	8	9	10	9	46
Ir-Mo-Os-Ru-Sc	10	6	10	10	10	46
Nb-Os-Re-Rh-W	8	8	10	10	10	46
Nb-Os-Re-Rh-Zr	10	8	8	10	10	46
Ge-Nb-Os-Pt-V	7	10	10	9	10	46
Ge-Nb-Os-Rh-W	8	8	10	10	10	46
Ge-Nb-Os-Rh-Zn	8	8	10	10	10	46
Nb-Os-Rh-Ru-W	8	8	10	10	10	46
Nb-Os-Rh-Ru-Zn	8	8	10	10	10	46
Mo-Os-Rh-Ru-Ta	9	8	9	10	10	46
Mo-Os-Rh-Ru-Zn	9	8	9	10	10	46
Mg-Ni-Os-Rh-Ru	8	8	10	10	10	46
Ga-Nb-Os-Pt-Zr	8	10	10	9	9	46
Ga-Nb-Os-Rh-Ta	9	8	10	10	9	46
Ga-Nb-Os-Rh-V	10	7	10	10	9	46
Ga-Nb-Os-Rh-Zr	10	7	10	10	9	46
Ge-Mg-Nb-Os-Rh	8	8	10	10	10	46
Hf-Os-Re-Rh-W	10	8	8	10	10	46
Hf-Os-Rh-Ru-Zr	10	8	8	10	10	46
Hf-Ir-Mo-Os-Pt	9	10	8	10	9	46
Hf-Ir-Mo-Os-Rh	10	8	9	10	9	46
Mn-Mo-Os-Rh-Ru	9	8	9	10	10	46
Ge-Ni-Os-Rh-W	8	8	10	10	10	46
Hf-Ir-Nb-Os-Ru	10	6	10	10	10	46
Ir-Nb-Os-Pt-Zr	8	10	10	9	9	46
Ir-Nb-Os-Re-Ru	10	6	10	10	10	46
Ir-Nb-Os-Re-Sc	10	6	10	10	10	46
Ir-Nb-Os-Re-V	10	6	10	10	10	46
Ir-Nb-Os-Rh-Ta	9	8	10	10	9	46
Ir-Nb-Os-Ru-Sc	10	6	10	10	10	46
Ir-Nb-Os-Sc-Zr	10	6	10	10	10	46
Ga-Ni-Os-Rh-V	10	7	10	10	9	46
Ir-Mg-Os-Re-Ru	10	6	10	10	10	46
Ir-Mg-Os-Rh-Ta	9	8	10	10	9	46
Ir-Mg-Os-Ru-Sc	10	6	10	10	10	46
Mg-Os-Rh-Ru-Si	8	8	10	10	10	46
Mg-Os-Rh-Ru-Zn	8	8	10	10	10	46
Mn-Nb-Os-Rh-Ru	8	8	10	10	10	46
Ir-Ni-Os-Pd-Rh	10	8	9	10	9	46
Ir-Ni-Os-Re-Ru	10	6	10	10	10	46
Ir-Ni-Os-Rh-Zr	10	8	9	10	9	46
Ir-Ni-Os-Ru-Sc	10	6	10	10	10	46
Os-Pd-Pt-Re-W	8	10	8	10	10	46
Os-Pd-Pt-Ru-Ti	8	10	9	9	10	46
Os-Pt-Re-Rh-Ti	8	10	8	10	10	46
Ir-Os-Pd-Pt-W	8	10	10	9	9	46
Os-Pt-Rh-Si-V	7	10	10	10	9	46
Os-Pt-Rh-Ta-V	8	10	9	10	9	46
Al-Ir-Os-Pd-Rh	10	8	10	10	9	47
Al-Ir-Os-Pt-Rh	8	10	10	10	9	47
Al-Ir-Os-Pt-Ru	8	10	10	9	10	47
As-Ge-Os-Rh-Ta	10	8	9	10	10	47
As-Ge-Os-Rh-Ti	10	8	9	10	10	47
Al-Co-Ir-Os-Rh	10	8	10	10	9	47
As-Nb-Os-Pt-Rh	8	10	10	10	9	47
As-Nb-Os-Pt-Ru	8	10	10	9	10	47
As-Nb-Os-Re-Rh	10	8	9	10	10	47
Al-Hf-Os-Pt-Ru	8	10	9	10	10	47
Al-Os-Rh-Ru-V	9	8	10	10	10	47
Al-Os-Rh-Ru-Zr	10	8	9	10	10	47
As-Fe-Os-Rh-Ru	10	8	9	10	10	47
As-Os-Pt-Ru-Ta	9	10	9	9	10	47
As-Os-Pt-Ru-Ti	8	10	10	9	10	47
As-Mn-Os-Rh-Ru	10	8	9	10	10	47
As-Ir-Nb-Os-Rh	10	8	10	10	9	47
As-Ir-Ni-Os-Rh	10	8	10	10	9	47
As-Ir-Os-Rh-Ta	10	8	10	10	9	47
As-Ir-Os-Rh-Ti	10	8	10	10	9	47
As-Ir-Os-Rh-V	10	8	10	10	9	47
Co-Ga-Os-Pt-Ta	9	10	10	9	9	47
Co-Ga-Os-Rh-Ta	10	8	10	10	9	47
Co-Fe-Ir-Os-Rh	10	8	10	10	9	47
Co-Cu-Ir-Os-Rh	10	8	10	10	9	47
Co-Os-Pd-Pt-Re	10	10	7	10	10	47
Co-Os-Pd-Rh-W	10	8	10	10	9	47
Cr-Os-Pd-Rh-Ru	10	8	9	10	10	47
Co-Os-Pt-Re-W	8	10	9	10	10	47
Co-Os-Pt-Rh-Ta	9	10	9	10	9	47
Co-Os-Pt-Rh-W	8	10	10	10	9	47
Co-Os-Pt-Ru-W	8	10	10	9	10	47
Co-Cr-Ir-Os-Rh	10	8	10	10	9	47
Cr-Os-Pt-Re-Ru	8	10	9	10	10	47
Co-Os-Re-Rh-Si	10	8	9	10	10	47
Co-Os-Re-Rh-V	10	8	9	10	10	47
Cr-Os-Re-Rh-Ru	10	8	9	10	10	47
Co-Mn-Os-Pt-Ru	8	10	10	9	10	47
Co-Ir-Mn-Os-Rh	10	8	10	10	9	47
Co-Ir-Mo-Os-Pt	9	10	10	9	9	47
Co-Ir-Mo-Os-Rh	10	8	10	10	9	47
Fe-Ir-Os-Pt-Rh	8	10	10	10	9	47
Fe-Ir-Os-Pt-Ru	8	10	10	9	10	47
Fe-Ir-Os-Re-Rh	10	8	9	10	10	47
Co-Ir-Nb-Os-Rh	10	8	10	10	9	47
Fe-Ir-Os-Rh-V	10	8	10	10	9	47
Fe-Ge-Os-Rh-V	10	8	9	10	10	47
Co-Ir-Ni-Os-Rh	10	8	10	10	9	47
Co-Ir-Os-Pd-Rh	10	8	10	10	9	47
Co-Ir-Os-Pt-Ta	9	10	10	9	9	47
Co-Ir-Os-Rh-Si	10	8	10	10	9	47
Co-Ir-Os-Rh-Ta	10	8	10	10	9	47
Co-Ir-Os-Rh-Ti	10	8	10	10	9	47
Co-Ir-Os-Rh-V	10	8	10	10	9	47
Co-Ir-Os-Rh-W	10	8	10	10	9	47
Co-Ir-Os-Rh-Zn	10	8	10	10	9	47
Co-Ir-Os-Rh-Zr	10	8	10	10	9	47
Co-Mo-Os-Pt-Rh	9	10	9	10	9	47
Cr-Ir-Os-Pt-Re	8	10	9	10	10	47
Cr-Ir-Os-Pt-Rh	8	10	10	10	9	47
Cr-Ir-Os-Pt-Ru	8	10	10	9	10	47
Cr-Ir-Os-Re-Rh	10	8	9	10	10	47
Cr-Ir-Os-Rh-V	10	8	10	10	9	47
Cr-Ge-Os-Rh-V	10	8	9	10	10	47
Co-Ge-Os-Pt-W	8	10	10	9	10	47
Co-Ge-Os-Rh-Ta	10	8	9	10	10	47
Co-Nb-Os-Pd-Rh	10	8	10	10	9	47
Fe-Ga-Os-Pt-Rh	8	10	10	10	9	47
Fe-Ga-Os-Pt-Ru	8	10	10	9	10	47
Cu-Ir-Os-Pt-Rh	8	10	10	10	9	47
Hf-Ir-Os-Pt-W	8	10	10	10	9	47
Hf-Ir-Os-Re-Rh	10	8	9	10	10	47
Hf-Ir-Os-Rh-Si	10	8	10	10	9	47
Co-Hf-Ir-Os-Rh	10	8	10	10	9	47
Hf-Ir-Os-Rh-V	10	8	10	10	9	47
Hf-Ir-Os-Rh-W	10	8	10	10	9	47
Ge-Os-Pd-Rh-V	10	8	9	10	10	47
Ga-Os-Pd-Rh-Ta	10	8	10	10	9	47
Ga-Os-Pt-Re-Ti	8	10	9	10	10	47
Ga-Hf-Os-Pt-Ta	9	10	9	10	9	47
Ga-Os-Pt-Rh-Ti	8	10	10	10	9	47
Ga-Os-Pt-Rh-W	8	10	10	10	9	47
Ga-Os-Pt-Ru-Ti	8	10	10	9	10	47
Ge-Os-Pt-V-W	8	10	10	9	10	47
Ge-Os-Re-Rh-Ti	10	8	9	10	10	47
Ge-Os-Re-Rh-V	10	8	9	10	10	47
Ga-Os-Re-Rh-Ta	10	8	9	10	10	47
Ge-Os-Rh-Si-V	9	8	10	10	10	47
Ge-Os-Rh-Ta-V	10	8	9	10	10	47
Ge-Os-Rh-Ta-W	9	8	10	10	10	47
Ge-Os-Rh-Ti-V	9	8	10	10	10	47
Ge-Os-Rh-V-Zn	10	8	9	10	10	47
Ir-Os-Pd-Re-Rh	10	8	9	10	10	47
Ir-Os-Pd-Rh-Si	10	8	10	10	9	47
Ir-Os-Pd-Rh-Ti	10	8	10	10	9	47
Ir-Os-Pd-Rh-V	10	8	10	10	9	47
Ir-Os-Pd-Rh-W	10	8	10	10	9	47
Ga-Os-Rh-Ta-V	10	8	10	10	9	47
Ir-Os-Pt-Re-Si	8	10	9	10	10	47
Ir-Os-Pt-Re-Ti	8	10	9	10	10	47
Ir-Os-Pt-Rh-Ti	8	10	10	10	9	47
Ir-Os-Pt-Rh-W	8	10	10	10	9	47
Ir-Os-Pt-Rh-Zn	8	10	10	10	9	47
Ir-Os-Pt-Ru-Si	8	10	10	9	10	47
Ge-Mn-Os-Rh-V	10	8	9	10	10	47
Ir-Os-Pt-Ru-Ti	8	10	10	9	10	47
Ir-Os-Pt-Ru-W	8	10	10	9	10	47
Ir-Os-Re-Rh-Ta	10	8	9	10	10	47
Ir-Os-Re-Rh-Zn	10	8	9	10	10	47
Ir-Os-Re-Rh-Zr	10	8	9	10	10	47
Ir-Os-Rh-Si-Zr	10	8	10	10	9	47
Ir-Os-Rh-Ta-V	10	8	10	10	9	47
Ir-Os-Rh-V-W	10	8	10	10	9	47
Ir-Os-Rh-V-Zn	10	8	10	10	9	47
Ir-Os-Rh-V-Zr	10	8	10	10	9	47
Ir-Os-Rh-W-Zr	10	8	10	10	9	47
Fe-Os-Pd-Rh-Ru	10	8	9	10	10	47
Ni-Os-Pd-Rh-Ru	10	8	9	10	10	47
Ir-Mn-Os-Pt-Rh	8	10	10	10	9	47
Ir-Mn-Os-Pt-Ru	8	10	10	9	10	47
Ir-Mn-Os-Re-Rh	10	8	9	10	10	47
Ir-Mn-Os-Rh-V	10	8	10	10	9	47
Ni-Os-Pt-Re-Ru	8	10	9	10	10	47
Os-Pt-Rh-V-W	8	10	10	10	9	47
Fe-Os-Re-Rh-Ru	10	8	9	10	10	47
Os-Pt-Ru-Ta-V	8	10	10	9	10	47
Os-Pt-Ru-V-W	8	10	10	9	10	47
Ni-Os-Re-Rh-Ru	10	8	9	10	10	47
Ga-Ge-Nb-Os-Pt	8	10	10	9	10	47
Ge-Mo-Nb-Os-Rh	9	8	10	10	10	47
Ni-Os-Rh-Ru-Zr	10	8	9	10	10	47
Mn-Os-Pd-Rh-Ru	10	8	9	10	10	47
Os-Re-Rh-Ru-Ta	10	8	9	10	10	47
Os-Re-Rh-Ru-Zn	10	8	9	10	10	47
Os-Re-Rh-Ru-Zr	10	8	9	10	10	47
Ga-Ir-Nb-Os-Rh	10	8	10	10	9	47
Ge-Ir-Nb-Os-Pt	8	10	10	9	10	47
Os-Re-Rh-V-W	10	8	9	10	10	47
Mn-Os-Re-Rh-Ru	10	8	9	10	10	47
Hf-Ni-Os-Rh-Ru	10	8	9	10	10	47
Ga-Ir-Ni-Os-Rh	10	8	10	10	9	47
Ge-Mo-Os-Rh-V	10	8	9	10	10	47
Ge-Mo-Os-Rh-W	9	8	10	10	10	47
Os-Rh-Ru-Si-V	9	8	10	10	10	47
Os-Rh-Ru-Ta-W	9	8	10	10	10	47
Os-Rh-Ru-Ta-Zr	10	8	9	10	10	47
Os-Rh-Ru-Ti-V	9	8	10	10	10	47
Os-Rh-Ru-Ti-Zr	10	8	9	10	10	47
Ga-Mo-Os-Pt-V	9	10	10	9	9	47
Ga-Mo-Os-Re-Rh	10	8	9	10	10	47
Ge-Ir-Os-Pt-Ti	8	10	10	9	10	47
Ga-Ir-Os-Pt-Ta	9	10	10	9	9	47
Ga-Ir-Os-Rh-Ta	10	8	10	10	9	47
Ga-Ir-Os-Rh-Ti	10	8	10	10	9	47
Ga-Ir-Os-Rh-V	10	8	10	10	9	47
Nb-Os-Pd-Pt-Ru	8	10	10	9	10	47
Nb-Os-Pd-Re-Rh	10	8	9	10	10	47
Mo-Os-Pd-Pt-Ru	9	10	9	9	10	47
Mo-Os-Pd-Rh-Ru	10	8	9	10	10	47
Nb-Os-Pt-Ru-Zr	8	10	10	9	10	47
Ir-Mo-Os-Pt-Re	9	10	8	10	10	47
Ir-Mo-Os-Re-Rh	10	8	9	10	10	47
Mo-Os-Pt-Re-Ru	9	10	8	10	10	47
Ir-Mo-Os-Rh-V	10	8	10	10	9	47
Nb-Os-Re-Rh-V	10	8	9	10	10	47
Mo-Os-Pt-Rh-V	9	10	9	10	9	47
Mo-Os-Pt-Ru-V	9	10	9	9	10	47
Ge-Nb-Os-Pt-Ru	8	10	10	9	10	47
Ge-Nb-Os-Rh-Ta	9	8	10	10	10	47
Mo-Os-Re-Rh-Ru	10	8	9	10	10	47
Nb-Os-Rh-Ru-Ta	9	8	10	10	10	47
Mo-Os-Rh-Ru-Si	9	8	10	10	10	47
Mo-Os-Rh-Ru-Ti	9	8	10	10	10	47
Mo-Os-Rh-Ru-W	9	8	10	10	10	47
Mo-Os-Rh-Ru-Zr	10	8	9	10	10	47
Ga-Nb-Os-Pd-Rh	10	8	10	10	9	47
Ga-Nb-Os-Pt-Rh	8	10	10	10	9	47
Ga-Nb-Os-Pt-Ru	8	10	10	9	10	47
Hf-Os-Pt-Ru-Ta	9	10	8	10	10	47
Hf-Os-Re-Rh-Ru	10	8	9	10	10	47
Hf-Os-Rh-Ru-Ta	10	8	9	10	10	47
Ge-Ni-Os-Rh-V	10	8	9	10	10	47
Hf-Ir-Nb-Os-Pt	8	10	10	10	9	47
Hf-Ir-Nb-Os-Rh	10	8	10	10	9	47
Ir-Nb-Os-Pd-Rh	10	8	10	10	9	47
Ir-Nb-Os-Pt-Rh	8	10	10	10	9	47
Ir-Nb-Os-Pt-Ru	8	10	10	9	10	47
Ir-Nb-Os-Rh-V	10	8	10	10	9	47
Ir-Nb-Os-Rh-Zr	10	8	10	10	9	47
Ga-Ni-Os-Pt-Rh	8	10	10	10	9	47
Ga-Ni-Os-Pt-Ru	8	10	10	9	10	47
Ir-Mg-Os-Rh-V	10	8	10	10	9	47
Mg-Os-Rh-Ru-Ta	9	8	10	10	10	47
Hf-Mo-Os-Rh-Ru	10	8	9	10	10	47
Ir-Ni-Os-Pt-Re	8	10	9	10	10	47
Ir-Ni-Os-Pt-Rh	8	10	10	10	9	47
Ir-Ni-Os-Pt-Ru	8	10	10	9	10	47
Ir-Ni-Os-Re-Rh	10	8	9	10	10	47
Mo-Nb-Os-Rh-Ru	9	8	10	10	10	47
Ir-Ni-Os-Rh-V	10	8	10	10	9	47
Os-Pd-Pt-Re-V	10	10	7	10	10	47
Os-Pd-Pt-Rh-W	8	10	10	10	9	47
Os-Pd-Pt-Ru-Ta	9	10	9	9	10	47
Os-Pd-Pt-Ru-W	8	10	10	9	10	47
Os-Pd-Re-Rh-Ru	10	8	9	10	10	47
Os-Pd-Re-Rh-W	10	8	9	10	10	47
Os-Pd-Rh-Ru-Ta	10	8	9	10	10	47
Os-Pd-Rh-V-W	10	8	10	10	9	47
Os-Pt-Re-Rh-Ta	9	10	8	10	10	47
Os-Pt-Re-Ru-Si	8	10	9	10	10	47
Os-Pt-Re-Ru-Ti	8	10	9	10	10	47
Os-Pt-Re-V-W	8	10	9	10	10	47
Al-Ir-Os-Rh-Ru	10	8	10	10	10	48
Al-Co-Os-Rh-Ru	10	8	10	10	10	48
As-Cr-Os-Rh-Ru	10	8	10	10	10	48
As-Co-Os-Rh-Ru	10	8	10	10	10	48
As-Ge-Os-Rh-V	10	8	10	10	10	48
Al-Os-Pd-Rh-Ru	10	8	10	10	10	48
Al-Os-Pt-Rh-Ru	8	10	10	10	10	48
As-Nb-Os-Rh-Ru	10	8	10	10	10	48
Al-Os-Rh-Ru-Sc	10	8	10	10	10	48
As-Ni-Os-Rh-Ru	10	8	10	10	10	48
As-Os-Pt-Rh-V	10	10	9	10	9	48
As-Os-Rh-Ru-Ta	10	8	10	10	10	48
As-Os-Rh-Ru-Ti	10	8	10	10	10	48
As-Os-Rh-Ru-V	10	8	10	10	10	48
As-Os-Rh-Ru-W	10	8	10	10	10	48
As-Ir-Os-Pt-V	10	10	10	9	9	48
As-Ir-Os-Rh-Ru	10	8	10	10	10	48
As-Ir-Os-Rh-Sc	10	8	10	10	10	48
As-Mo-Os-Rh-Ru	10	8	10	10	10	48
Co-Ga-Os-Pt-V	10	10	10	9	9	48
Co-Os-Pd-Pt-Rh	10	10	9	10	9	48
Co-Os-Pd-Rh-Ru	10	8	10	10	10	48
Co-Os-Pt-Re-V	10	10	8	10	10	48
Co-Os-Pt-Ru-Ta	9	10	10	9	10	48
Cr-Os-Pt-Rh-Ru	8	10	10	10	10	48
Co-Os-Re-Rh-Ru	10	8	10	10	10	48
Co-Os-Re-Rh-W	10	8	10	10	10	48
Co-Os-Rh-Ru-Si	10	8	10	10	10	48
Co-Os-Rh-Ru-Ta	10	8	10	10	10	48
Co-Os-Rh-Ru-Ti	10	8	10	10	10	48
Co-Os-Rh-Ru-V	10	8	10	10	10	48
Co-Os-Rh-Ru-W	10	8	10	10	10	48
Co-Os-Rh-Ru-Zn	10	8	10	10	10	48
Co-Os-Rh-Ru-Zr	10	8	10	10	10	48
Co-Hf-Os-Rh-Ru	10	8	10	10	10	48
Cr-Os-Rh-Ru-V	10	8	10	10	10	48
Co-Mn-Os-Rh-Ru	10	8	10	10	10	48
Co-Fe-Os-Rh-Ru	10	8	10	10	10	48
Co-Cu-Os-Rh-Ru	10	8	10	10	10	48
Co-Cr-Os-Rh-Ru	10	8	10	10	10	48
Fe-Ir-Os-Rh-Ru	10	8	10	10	10	48
Fe-Ir-Os-Rh-Sc	10	8	10	10	10	48
Fe-Ge-Os-Rh-Ru	10	8	10	10	10	48
Co-Ge-Nb-Os-Rh	10	8	10	10	10	48
Co-Ir-Os-Pd-Pt	10	10	10	9	9	48
Co-Ir-Os-Pt-V	10	10	10	9	9	48
Co-Ir-Os-Re-Rh	10	8	10	10	10	48
Co-Ir-Os-Rh-Ru	10	8	10	10	10	48
Co-Ir-Os-Rh-Sc	10	8	10	10	10	48
Co-Mo-Os-Pt-Ru	9	10	10	9	10	48
Co-Mo-Os-Rh-Ru	10	8	10	10	10	48
Cr-Ir-Os-Rh-Ru	10	8	10	10	10	48
Co-Ge-Os-Rh-Ti	10	8	10	10	10	48
Co-Ge-Os-Rh-V	10	8	10	10	10	48
Ge-Hf-Ir-Os-Rh	10	8	10	10	10	48
Co-Nb-Os-Re-Rh	10	8	10	10	10	48
Co-Nb-Os-Rh-Ru	10	8	10	10	10	48
Fe-Ga-Os-Rh-Ru	10	8	10	10	10	48
Cu-Ir-Os-Rh-Ru	10	8	10	10	10	48
Cu-Ir-Os-Rh-Sc	10	8	10	10	10	48
Hf-Ir-Os-Pt-V	10	10	9	10	9	48
Hf-Ir-Os-Rh-Ru	10	8	10	10	10	48
Ge-Hf-Nb-Os-Rh	10	8	10	10	10	48
Ge-Os-Pt-Rh-Ta	9	10	9	10	10	48
Ge-Os-Pt-Rh-Ti	8	10	10	10	10	48
Ge-Os-Pt-Ru-Ta	9	10	10	9	10	48
Ga-Os-Pt-Re-Ta	9	10	9	10	10	48
Ga-Os-Pt-Rh-Ta	9	10	10	10	9	48
Ga-Os-Pt-Ru-Ta	9	10	10	9	10	48
Co-Ni-Os-Rh-Ru	10	8	10	10	10	48
Ga-Os-Re-Rh-Ti	10	8	10	10	10	48
Ge-Os-Rh-Ru-Ta	10	8	10	10	10	48
Ge-Os-Rh-Ru-Ti	10	8	10	10	10	48
Ge-Os-Rh-Ru-V	10	8	10	10	10	48
Ge-Os-Rh-V-W	10	8	10	10	10	48
Ga-Os-Rh-Ru-Ta	10	8	10	10	10	48
Ga-Os-Rh-Ru-Ti	10	8	10	10	10	48
Ga-Os-Rh-Ru-V	10	8	10	10	10	48
Ir-Os-Pd-Rh-Ru	10	8	10	10	10	48
Ga-Os-Rh-Ru-Zr	10	8	10	10	10	48
Ir-Os-Pd-Rh-Sc	10	8	10	10	10	48
Ir-Os-Pt-Re-Ta	9	10	9	10	10	48
Ir-Os-Pt-Re-W	8	10	10	10	10	48
Ir-Os-Pt-Rh-Ta	9	10	10	10	9	48
Ir-Os-Pt-Ru-Ta	9	10	10	9	10	48
Hf-Nb-Os-Pt-Ru	8	10	10	10	10	48
Hf-Nb-Os-Rh-Ru	10	8	10	10	10	48
Ge-Hf-Os-Rh-Ru	10	8	10	10	10	48
Ir-Os-Re-Rh-Ru	10	8	10	10	10	48
Ir-Os-Re-Rh-Sc	10	8	10	10	10	48
Ir-Os-Re-Rh-Si	10	8	10	10	10	48
Ir-Os-Re-Rh-Ti	10	8	10	10	10	48
Ir-Os-Re-Rh-V	10	8	10	10	10	48
Ir-Os-Re-Rh-W	10	8	10	10	10	48
Ir-Os-Rh-Ru-Sc	10	8	10	10	10	48
Ir-Os-Rh-Ru-Si	10	8	10	10	10	48
Ir-Os-Rh-Ru-Ta	10	8	10	10	10	48
Ir-Os-Rh-Ru-Ti	10	8	10	10	10	48
Ir-Os-Rh-Ru-V	10	8	10	10	10	48
Ir-Os-Rh-Ru-W	10	8	10	10	10	48
Ir-Os-Rh-Ru-Zn	10	8	10	10	10	48
Ir-Os-Rh-Ru-Zr	10	8	10	10	10	48
Ir-Os-Rh-Sc-Si	10	8	10	10	10	48
Ir-Os-Rh-Sc-Ta	10	8	10	10	10	48
Ir-Os-Rh-Sc-Zn	10	8	10	10	10	48
Fe-Os-Pt-Rh-Ru	8	10	10	10	10	48
Ir-Mn-Os-Rh-Ru	10	8	10	10	10	48
Ni-Os-Pt-Rh-Ru	8	10	10	10	10	48
Ga-Ge-Nb-Os-Rh	10	8	10	10	10	48
Fe-Os-Rh-Ru-V	10	8	10	10	10	48
Ni-Os-Rh-Ru-Sc	10	8	10	10	10	48
Ni-Os-Rh-Ru-V	10	8	10	10	10	48
Os-Re-Rh-Ru-Si	10	8	10	10	10	48
Os-Re-Rh-Ru-Ti	10	8	10	10	10	48
Os-Re-Rh-Ru-V	10	8	10	10	10	48
Os-Re-Rh-Ru-W	10	8	10	10	10	48
Ge-Ir-Nb-Os-Rh	10	8	10	10	10	48
Mn-Os-Pt-Rh-Ru	8	10	10	10	10	48
Ga-Ge-Os-Pt-Ta	9	10	10	9	10	48
Ga-Ge-Os-Rh-Ta	10	8	10	10	10	48
Ga-Ge-Os-Rh-Ti	10	8	10	10	10	48
Ga-Ge-Os-Rh-V	10	8	10	10	10	48
Mn-Os-Rh-Ru-V	10	8	10	10	10	48
Ge-Mo-Os-Pt-Ru	9	10	10	9	10	48
Ge-Mo-Os-Rh-Ru	10	8	10	10	10	48
Os-Rh-Ru-Sc-Si	10	8	10	10	10	48
Os-Rh-Ru-Sc-Zn	10	8	10	10	10	48
Os-Rh-Ru-Si-Zr	10	8	10	10	10	48
Os-Rh-Ru-Ta-V	10	8	10	10	10	48
Ga-Mo-Os-Pt-Ru	9	10	10	9	10	48
Os-Rh-Ru-V-W	10	8	10	10	10	48
Os-Rh-Ru-V-Zn	10	8	10	10	10	48
Os-Rh-Ru-V-Zr	10	8	10	10	10	48
Os-Rh-Ru-W-Zr	10	8	10	10	10	48
Ga-Mo-Os-Rh-Ru	10	8	10	10	10	48
Ge-Ir-Os-Pt-Ta	9	10	10	9	10	48
Ge-Ir-Os-Rh-Ta	10	8	10	10	10	48
Ge-Ir-Os-Rh-Ti	10	8	10	10	10	48
Ge-Ir-Os-Rh-V	10	8	10	10	10	48
Ga-Ir-Os-Pt-V	10	10	10	9	9	48
Nb-Os-Pd-Rh-Ru	10	8	10	10	10	48
Nb-Os-Pt-Re-Rh	8	10	10	10	10	48
Nb-Os-Pt-Re-Ru	8	10	10	10	10	48
Nb-Os-Pt-Rh-Ru	8	10	10	10	10	48
Nb-Os-Pt-Rh-Sc	8	10	10	10	10	48
Ir-Mo-Os-Pt-Rh	9	10	10	10	9	48
Ir-Mo-Os-Pt-Ru	9	10	10	9	10	48
Ir-Mo-Os-Rh-Ru	10	8	10	10	10	48
Ir-Mo-Os-Rh-Sc	10	8	10	10	10	48
Nb-Os-Re-Rh-Ru	10	8	10	10	10	48
Ge-Nb-Os-Pd-Rh	10	8	10	10	10	48
Ge-Nb-Os-Pt-Rh	8	10	10	10	10	48
Ge-Nb-Os-Re-Rh	10	8	10	10	10	48
Ge-Nb-Os-Rh-Ru	10	8	10	10	10	48
Ge-Nb-Os-Rh-V	10	8	10	10	10	48
Nb-Os-Rh-Ru-Sc	10	8	10	10	10	48
Nb-Os-Rh-Ru-V	10	8	10	10	10	48
Nb-Os-Rh-Ru-Zr	10	8	10	10	10	48
Mo-Os-Rh-Ru-V	10	8	10	10	10	48
Ga-Nb-Os-Pt-Sc	8	10	10	10	10	48
Ga-Nb-Os-Re-Rh	10	8	10	10	10	48
Ga-Nb-Os-Rh-Ru	10	8	10	10	10	48
Hf-Os-Rh-Ru-Si	10	8	10	10	10	48
Hf-Os-Rh-Ru-V	10	8	10	10	10	48
Hf-Os-Rh-Ru-W	10	8	10	10	10	48
Ge-Ni-Os-Rh-Ru	10	8	10	10	10	48
Ir-Nb-Os-Pt-Re	8	10	10	10	10	48
Ir-Nb-Os-Pt-Sc	8	10	10	10	10	48
Ir-Nb-Os-Re-Rh	10	8	10	10	10	48
Ir-Nb-Os-Rh-Ru	10	8	10	10	10	48
Ir-Nb-Os-Rh-Sc	10	8	10	10	10	48
Ga-Ni-Os-Rh-Ru	10	8	10	10	10	48
Ir-Mg-Os-Rh-Ru	10	8	10	10	10	48
Mg-Os-Rh-Ru-Sc	10	8	10	10	10	48
Ir-Ni-Os-Rh-Ru	10	8	10	10	10	48
Ir-Ni-Os-Rh-Sc	10	8	10	10	10	48
Os-Pd-Pt-Re-Rh	10	10	8	10	10	48
Os-Pd-Pt-Rh-V	10	10	9	10	9	48
Os-Pd-Rh-Ru-Ti	10	8	10	10	10	48
Os-Pd-Rh-Ru-V	10	8	10	10	10	48
Os-Pd-Rh-Ru-W	10	8	10	10	10	48
Os-Pt-Re-Rh-W	8	10	10	10	10	48
Ir-Os-Pd-Pt-V	10	10	10	9	9	48
Os-Pt-Re-Ru-Ta	9	10	9	10	10	48
Os-Pt-Re-Ru-W	8	10	10	10	10	48
Os-Pt-Rh-Ru-Ti	8	10	10	10	10	48
Os-Pt-Rh-Ru-W	8	10	10	10	10	48
Os-Pt-Rh-Ru-Zn	8	10	10	10	10	48
As-Os-Pt-Ru-V	10	10	10	9	10	49
Co-Os-Pd-Pt-Ru	10	10	10	9	10	49
Co-Os-Pt-Re-Rh	10	10	9	10	10	49
Co-Os-Pt-Rh-V	10	10	10	10	9	49
Co-Os-Pt-Ru-V	10	10	10	9	10	49
Co-Ir-Os-Pt-Rh	10	10	10	10	9	49
Co-Ir-Os-Pt-Ru	10	10	10	9	10	49
Co-Ge-Os-Pt-V	10	10	10	9	10	49
Ge-Os-Pt-Re-V	10	10	9	10	10	49
Ge-Os-Pt-Ru-V	10	10	10	9	10	49
Ga-Os-Pt-Rh-V	10	10	10	10	9	49
Ga-Os-Pt-Ru-V	10	10	10	9	10	49
Ga-Os-Pt-Ru-Zr	10	10	10	9	10	49
Ir-Os-Pt-Re-V	10	10	9	10	10	49
Ir-Os-Pt-Rh-V	10	10	10	10	9	49
Ir-Os-Pt-Ru-V	10	10	10	9	10	49
Ga-Ge-Os-Pt-V	10	10	10	9	10	49
Ge-Ir-Os-Pt-V	10	10	10	9	10	49
Ga-Ir-Os-Pt-Rh	10	10	10	10	9	49
Mo-Os-Pt-Rh-Ru	9	10	10	10	10	49
Os-Pd-Pt-Re-Ru	10	10	9	10	10	49
Os-Pd-Pt-Ru-V	10	10	10	9	10	49
Ir-Os-Pd-Pt-Re	10	10	9	10	10	49
Ir-Os-Pd-Pt-Rh	10	10	10	10	9	49
Ir-Os-Pd-Pt-Ru	10	10	10	9	10	49
Os-Pt-Re-Rh-V	10	10	9	10	10	49
Os-Pt-Rh-Ru-Ta	9	10	10	10	10	49
As-Os-Pt-Rh-Ru	10	10	10	10	10	50
Co-Os-Pt-Re-Ru	10	10	10	10	10	50
Co-Os-Pt-Rh-Ru	10	10	10	10	10	50
Co-Ir-Os-Pt-Re	10	10	10	10	10	50
Ge-Os-Pt-Rh-V	10	10	10	10	10	50
Ga-Os-Pt-Re-V	10	10	10	10	10	50
Ga-Os-Pt-Rh-Ru	10	10	10	10	10	50
Ir-Os-Pt-Re-Rh	10	10	10	10	10	50
Ir-Os-Pt-Re-Ru	10	10	10	10	10	50
Ir-Os-Pt-Rh-Ru	10	10	10	10	10	50
Ir-Os-Pt-Rh-Sc	10	10	10	10	10	50
Os-Pd-Pt-Rh-Ru	10	10	10	10	10	50
Os-Pt-Re-Rh-Ru	10	10	10	10	10	50
Os-Pt-Re-Ru-V	10	10	10	10	10	50
Os-Pt-Rh-Ru-V	10	10	10	10	10	50
