# Supplementary material for: The most sustainable high entropy alloys for the future
Source: Research Square preprint supplement (doi:10.21203/rs.3.rs-3553470/v1), 2023-12-11
Supplement: Supplementary file 2 [file 6ce29b22aa3a874a33fcb39f.xlsx]

## Sheet: Feuil1
Alloy	Decile number					Supply Risk Score
	Companionability	CO2 Footprint	Supply Risk	Production	Reserve
Al-Mo-Ni-Ta-Zn	1	1	1	1	1	5
Al-Mo-Ni-Ti-Zn	1	1	1	1	1	5
Al-Fe-Ta-Ti-Zn	1	1	1	1	1	5
Al-Fe-Ta-Ti-Zr	1	1	1	1	1	5
Al-Cr-Mn-Mo-Ni	1	1	1	1	1	5
Al-Fe-Ta-V-Zn	1	1	1	1	1	5
Al-Cr-Mn-Mo-Ta	1	1	1	1	1	5
Al-Cr-Mn-Mo-Ti	1	1	1	1	1	5
Al-Fe-Ti-V-Zn	1	1	1	1	1	5
Al-Cr-Mn-Ni-Ti	1	1	1	1	1	5
Al-Cr-Mn-Ta-Ti	1	1	1	1	1	5
Al-Cr-Mn-Ta-V	1	1	1	1	1	5
Al-Cr-Mn-Ta-Zn	1	1	1	1	1	5
Al-Cu-Ni-Ta-Ti	1	1	1	1	1	5
Al-Cr-Mo-Ni-Ta	1	1	1	1	1	5
Al-Cr-Mo-Ni-Ti	1	1	1	1	1	5
Al-Cr-Mo-Ta-Ti	1	1	1	1	1	5
Al-Cr-Mo-Ta-Zn	1	1	1	1	1	5
Al-Cr-Mo-Ti-Zn	1	1	1	1	1	5
Al-Mo-Ta-Ti-Zn	1	1	1	1	1	5
Al-Co-Cr-Fe-Ni	1	1	1	1	1	5
Al-Cu-Ta-Ti-Zn	1	1	1	1	1	5
Al-Cu-Ti-V-Zn	1	1	1	1	1	5
Al-Cr-Ta-Ti-Zn	1	1	1	1	1	5
Al-Cu-Fe-Mn-Ni	1	1	1	1	1	5
Al-Cu-Fe-Mo-Ni	1	1	1	1	1	5
Al-Cu-Fe-Nb-Ni	1	1	1	1	1	5
Al-Cu-Fe-Ta-Ti	1	1	1	1	1	5
Al-Co-Fe-Mn-Ni	1	1	1	1	1	5
Al-Co-Fe-Ni-Ta	1	1	1	1	1	5
Al-Cr-Fe-Mn-Mo	1	1	1	1	1	5
Al-Cr-Fe-Mn-Ni	1	1	1	1	1	5
Al-Cr-Fe-Mn-Ta	1	1	1	1	1	5
Al-Cr-Fe-Mn-Ti	1	1	1	1	1	5
Al-Cr-Fe-Mn-V	1	1	1	1	1	5
Al-Cr-Fe-Mo-Ni	1	1	1	1	1	5
Al-Cr-Fe-Mo-Ta	1	1	1	1	1	5
Al-Cr-Fe-Mo-Ti	1	1	1	1	1	5
Al-Cr-Fe-Mo-Zn	1	1	1	1	1	5
Al-Cr-Fe-Ni-V	1	1	1	1	1	5
Al-Cr-Fe-Ta-Ti	1	1	1	1	1	5
Al-Cr-Fe-Ta-V	1	1	1	1	1	5
Al-Cr-Fe-Ta-Zn	1	1	1	1	1	5
Al-Cr-Fe-Ti-Zn	1	1	1	1	1	5
Al-Fe-Mn-Mo-Ni	1	1	1	1	1	5
Al-Fe-Mn-Mo-Ta	1	1	1	1	1	5
Al-Fe-Mn-Mo-Ti	1	1	1	1	1	5
Al-Fe-Mn-Mo-Zn	1	1	1	1	1	5
Al-Fe-Mn-Nb-Zn	1	1	1	1	1	5
Al-Fe-Mn-Ni-Ti	1	1	1	1	1	5
Al-Fe-Mn-Ni-V	1	1	1	1	1	5
Al-Fe-Mn-Ta-Ti	1	1	1	1	1	5
Al-Fe-Mn-Ta-V	1	1	1	1	1	5
Al-Fe-Mn-Ta-Zn	1	1	1	1	1	5
Al-Fe-Mn-Ti-V	1	1	1	1	1	5
Al-Fe-Mn-Ti-Zn	1	1	1	1	1	5
Al-Fe-Mn-V-Zn	1	1	1	1	1	5
Al-Fe-Mo-Nb-Zn	1	1	1	1	1	5
Al-Fe-Mo-Ni-Ta	1	1	1	1	1	5
Al-Fe-Mo-Ni-Ti	1	1	1	1	1	5
Al-Fe-Mo-Ni-Zn	1	1	1	1	1	5
Al-Mn-Mo-Ni-Ta	1	1	1	1	1	5
Al-Mn-Mo-Ni-Ti	1	1	1	1	1	5
Al-Ni-Ta-Ti-Zn	1	1	1	1	1	5
Al-Ni-Ti-Zn-Zr	1	1	1	1	1	5
Al-Fe-Mo-Ta-Ti	1	1	1	1	1	5
Al-Fe-Mo-Ta-Zn	1	1	1	1	1	5
Al-Fe-Mo-Ti-V	1	1	1	1	1	5
Al-Fe-Mo-Ti-Zn	1	1	1	1	1	5
Al-Fe-Mo-W-Zn	1	1	1	1	1	5
Al-Mn-Mo-Si-Ta	1	1	1	1	1	5
Al-Mn-Mo-Ta-Ti	1	1	1	1	1	5
Al-Mn-Mo-Ta-Zn	1	1	1	1	1	5
Al-Mn-Mo-Ti-Zn	1	1	1	1	1	5
As-Cu-Fe-Ni-Zn	1	1	1	1	1	5
Al-Fe-Ni-Ta-Ti	1	1	1	1	1	5
Al-Fe-Ni-Ta-Zn	1	1	1	1	1	5
Al-Fe-Ni-V-Zn	1	1	1	1	1	5
Al-Mn-Ni-Ta-Ti	1	1	1	1	1	5
As-Cr-Fe-Mn-Ni	1	1	1	1	1	5
As-Cr-Fe-Mn-Zn	1	1	1	1	1	5
As-Cr-Fe-Ni-Zn	1	1	1	1	1	5
As-Fe-Mn-Ni-Zn	1	1	1	1	1	5
Al-Mn-Ta-Ti-Zn	1	1	1	1	1	5
Al-Mo-Ni-Ta-Ti	1	1	1	1	1	5
Co-Cr-Fe-Ni-Ta	1	1	1	1	1	5
Co-Cr-Fe-Ni-Zn	1	1	1	1	1	5
Co-Fe-Mn-Ni-Ta	1	1	1	1	1	5
Co-Fe-Mn-Ni-Ti	1	1	1	1	1	5
Co-Fe-Mn-Ni-Zn	1	1	1	1	1	5
Cr-Mn-Mo-Nb-Zn	1	1	1	1	1	5
Cr-Mn-Mo-Ni-Si	1	1	1	1	1	5
Cr-Mn-Mo-Ni-Ta	1	1	1	1	1	5
Cr-Mn-Mo-Ni-Ti	1	1	1	1	1	5
Cr-Fe-Mn-Mo-Nb	1	1	1	1	1	5
Cr-Fe-Mn-Mo-Ni	1	1	1	1	1	5
Cr-Mn-Mo-Ni-Zn	1	1	1	1	1	5
Cr-Fe-Mn-Mo-Si	1	1	1	1	1	5
Cr-Fe-Mn-Mo-Ta	1	1	1	1	1	5
Cr-Fe-Mn-Mo-Ti	1	1	1	1	1	5
Cr-Fe-Mn-Mo-W	1	1	1	1	1	5
Cr-Fe-Mn-Mo-Zn	1	1	1	1	1	5
Cr-Fe-Mn-Nb-Ni	1	1	1	1	1	5
Cr-Fe-Mn-Nb-Zn	1	1	1	1	1	5
Cr-Fe-Mn-Ni-Si	1	1	1	1	1	5
Cr-Fe-Mn-Ni-Ta	1	1	1	1	1	5
Cr-Fe-Mn-Ni-V	1	1	1	1	1	5
Cr-Fe-Mn-Ni-W	1	1	1	1	1	5
Cr-Fe-Mn-Ni-Zn	1	1	1	1	1	5
Co-Cu-Mn-Ni-Zn	1	1	1	1	1	5
Cr-Mn-Mo-Si-Ta	1	1	1	1	1	5
Cr-Mn-Mo-Si-Ti	1	1	1	1	1	5
Cr-Mn-Mo-Ta-Ti	1	1	1	1	1	5
Cr-Mn-Mo-Ta-Zn	1	1	1	1	1	5
Cr-Mn-Mo-Ti-Zn	1	1	1	1	1	5
Cr-Mn-Mo-W-Zn	1	1	1	1	1	5
Cr-Fe-Mn-Si-V	1	1	1	1	1	5
Cr-Mn-Nb-Ni-Zn	1	1	1	1	1	5
Cr-Fe-Mn-Ta-V	1	1	1	1	1	5
Cr-Fe-Mn-Ta-W	1	1	1	1	1	5
Cr-Fe-Mn-V-Zn	1	1	1	1	1	5
Cr-Fe-Mo-Nb-Ni	1	1	1	1	1	5
Cr-Fe-Mo-Nb-Zn	1	1	1	1	1	5
Cr-Fe-Mo-Ni-Si	1	1	1	1	1	5
Cr-Fe-Mo-Ni-Ta	1	1	1	1	1	5
Cr-Fe-Mo-Ni-Ti	1	1	1	1	1	5
Cr-Fe-Mo-Ni-W	1	1	1	1	1	5
Cr-Fe-Mo-Ni-Zn	1	1	1	1	1	5
Cr-Fe-Mo-Si-Ta	1	1	1	1	1	5
Cr-Fe-Mo-Ta-Ti	1	1	1	1	1	5
Cr-Fe-Mo-Ta-Zn	1	1	1	1	1	5
Cr-Fe-Mo-Ti-Zn	1	1	1	1	1	5
Cr-Fe-Mo-W-Zn	1	1	1	1	1	5
Cr-Fe-Nb-Ni-Zn	1	1	1	1	1	5
Co-Fe-Ni-Ta-Ti	1	1	1	1	1	5
Co-Fe-Ni-Ta-Zn	1	1	1	1	1	5
Co-Fe-Ni-Ti-Zn	1	1	1	1	1	5
Cr-Mn-Ni-Ti-V	1	1	1	1	1	5
Co-Cr-Mn-Ni-Zn	1	1	1	1	1	5
Cu-Fe-Mn-Mo-Ni	1	1	1	1	1	5
Cr-Fe-Ni-V-Zn	1	1	1	1	1	5
Cu-Fe-Mn-Ni-Zn	1	1	1	1	1	5
Cu-Fe-Nb-Ni-Zn	1	1	1	1	1	5
Cr-Mn-Ta-W-Zn	1	1	1	1	1	5
Cu-Fe-Ni-V-Zn	1	1	1	1	1	5
Cu-Ni-Ta-Ti-Zn	1	1	1	1	1	5
Cu-Ni-Ti-V-Zn	1	1	1	1	1	5
Cu-Ni-Ti-Zn-Zr	1	1	1	1	1	5
Cu-Mg-Ti-Zn-Zr	1	1	1	1	1	5
Cr-Fe-Ta-W-Zn	1	1	1	1	1	5
Cr-Mo-Ni-Si-Ta	1	1	1	1	1	5
Cr-Mo-Ni-Ta-Ti	1	1	1	1	1	5
Cr-Mo-Ni-Ta-Zn	1	1	1	1	1	5
Co-Cu-Fe-Ni-Zn	1	1	1	1	1	5
Fe-Mo-Ta-Ti-Zn	1	1	1	1	1	5
Cr-Mo-Si-Ta-Ti	1	1	1	1	1	5
Cr-Mo-Ta-Ti-Zn	1	1	1	1	1	5
Co-Cr-Cu-Fe-Ni	1	1	1	1	1	5
Co-Cr-Fe-Mn-Ni	1	1	1	1	1	5
Co-Cr-Fe-Mn-Si	1	1	1	1	1	5
Co-Cr-Fe-Mn-Ta	1	1	1	1	1	5
Co-Cr-Fe-Mn-Ti	1	1	1	1	1	5
Co-Cr-Fe-Mn-Zn	1	1	1	1	1	5
Fe-Mn-Mo-Nb-Ni	1	1	1	1	1	5
Fe-Mn-Mo-Nb-Zn	1	1	1	1	1	5
Fe-Mn-Mo-Ni-Si	1	1	1	1	1	5
Fe-Mn-Mo-Ni-Ta	1	1	1	1	1	5
Fe-Mn-Mo-Ni-Ti	1	1	1	1	1	5
Cr-Cu-Fe-Mn-Ni	1	1	1	1	1	5
Cr-Cu-Fe-Mo-Ni	1	1	1	1	1	5
Cr-Cu-Fe-Nb-Ni	1	1	1	1	1	5
Fe-Mn-Mo-Si-Ta	1	1	1	1	1	5
Fe-Mn-Mo-Ta-Ti	1	1	1	1	1	5
Fe-Mn-Mo-Ta-Zn	1	1	1	1	1	5
Fe-Mn-Mo-Ti-Zn	1	1	1	1	1	5
Fe-Mn-Nb-Ni-Zn	1	1	1	1	1	5
Cu-Nb-Ni-Zn-Zr	1	1	1	1	1	5
Fe-Mn-Ni-Si-V	1	1	1	1	1	5
Fe-Mn-Ni-Ta-W	1	1	1	1	1	5
Fe-Mn-Ni-Ti-Zn	1	1	1	1	1	5
Fe-Mn-Ni-V-Zn	1	1	1	1	1	5
Fe-Ni-Ta-Ti-Zn	1	1	1	1	1	5
Fe-Ni-Ti-V-Zn	1	1	1	1	1	5
Cu-Nb-Ti-Zn-Zr	1	1	1	1	1	5
Mn-Ni-Ta-W-Zn	1	1	1	1	1	5
Fe-Mn-Ta-W-Zn	1	1	1	1	1	5
Fe-Mo-Nb-Ni-Zn	1	1	1	1	1	5
Fe-Mo-Ni-Si-Ta	1	1	1	1	1	5
Fe-Mo-Ni-Ta-Ti	1	1	1	1	1	5
Fe-Mo-Ni-Ta-Zn	1	1	1	1	1	5
Fe-Mo-Ni-Ti-Zn	1	1	1	1	1	5
Mo-Ni-Ta-Ti-Zn	1	1	1	1	1	5
Mn-Mo-Nb-Ni-Zn	1	1	1	1	1	5
Mn-Mo-Ni-Si-Ta	1	1	1	1	1	5
Mn-Mo-Ni-Ta-Ti	1	1	1	1	1	5
Mn-Mo-Ni-Ta-Zn	1	1	1	1	1	5
Mn-Mo-Ni-Ti-Zn	1	1	1	1	1	5
Mn-Mo-Si-Ta-Ti	1	1	1	1	1	5
Mn-Mo-Ta-Ti-Zn	1	1	1	1	1	5
Al-Mo-Ni-Ti-Zr	2	1	1	1	1	6
Al-Mo-Ni-V-Zn	2	1	1	1	1	6
Al-Cu-Nb-Ti-Zn	1	1	2	1	1	6
Al-Cu-Nb-Ti-Zr	1	1	2	1	1	6
Al-Cr-Mn-Mo-Nb	1	1	2	1	1	6
Al-Fe-Ta-W-Zn	1	1	2	1	1	6
Al-Cr-Mn-Mo-V	2	1	1	1	1	6
Al-Cr-Mn-Mo-W	1	1	2	1	1	6
Al-Cr-Mn-Nb-Ni	1	1	2	1	1	6
Al-Co-Mn-Mo-Ni	2	1	1	1	1	6
Al-Cr-Mn-Si-V	1	1	2	1	1	6
Al-Cr-Mn-Ta-W	1	1	2	1	1	6
Al-Cr-Mn-Ti-V	1	1	2	1	1	6
Al-Cr-Mo-Nb-Ni	1	1	2	1	1	6
Al-Cr-Mo-Ni-V	2	1	1	1	1	6
Al-Cr-Mo-Ni-W	1	1	2	1	1	6
Al-Cr-Mo-Ta-Zr	2	1	1	1	1	6
Al-Cr-Ni-Ta-W	1	1	2	1	1	6
Al-Cr-Ni-Ti-V	1	1	2	1	1	6
Al-Mo-Si-Ta-Ti	1	1	2	1	1	6
Al-Mo-Ta-Ti-Zr	2	1	1	1	1	6
Al-Mo-Ti-W-Zn	1	1	2	1	1	6
Al-Co-Cr-Fe-Mo	2	1	1	1	1	6
Al-Cu-Ta-Ti-V	1	1	1	2	1	6
Al-Cu-Ta-Ti-Zr	2	1	1	1	1	6
Al-Cr-Ta-V-Zn	1	1	1	2	1	6
Al-Co-Cu-Mo-Ni	2	1	1	1	1	6
Al-Ta-Ti-Zn-Zr	2	1	1	1	1	6
Al-Co-Fe-Mn-Mo	2	1	1	1	1	6
Al-Co-Fe-Mo-Ni	2	1	1	1	1	6
Al-Co-Fe-Mo-Ta	2	1	1	1	1	6
Al-Nb-Ti-Zn-Zr	1	1	2	1	1	6
Al-Cr-Fe-Mn-Nb	1	1	2	1	1	6
Al-Cr-Fe-Mn-W	1	1	2	1	1	6
Al-Cr-Fe-Mo-Nb	1	1	2	1	1	6
Al-Cr-Fe-Mo-V	2	1	1	1	1	6
Al-Cr-Fe-Mo-W	1	1	2	1	1	6
Al-Cr-Fe-Nb-Ni	1	1	2	1	1	6
Al-Cr-Fe-Nb-Ta	1	1	2	1	1	6
Al-Cr-Fe-Ni-W	1	1	2	1	1	6
Al-Cr-Fe-Si-V	1	1	2	1	1	6
Al-Cr-Fe-Ta-W	1	1	2	1	1	6
Al-Cr-Fe-Ti-V	1	1	2	1	1	6
Al-Cr-Fe-Ti-W	1	1	2	1	1	6
Al-Fe-Mn-Mo-Nb	1	1	2	1	1	6
Al-Fe-Mn-Mo-V	2	1	1	1	1	6
Al-Fe-Mn-Mo-W	1	1	2	1	1	6
Al-Fe-Mn-Nb-Ni	1	1	2	1	1	6
Al-Fe-Mn-Nb-Ti	1	1	2	1	1	6
Al-Fe-Mn-Si-V	1	1	2	1	1	6
Al-Fe-Mn-Ta-W	1	1	2	1	1	6
Al-Fe-Mn-Ti-W	1	1	2	1	1	6
Al-Fe-Mo-Nb-Ni	1	1	2	1	1	6
Al-Fe-Mo-Nb-Ti	1	1	2	1	1	6
Al-Fe-Mo-Nb-Zr	2	1	1	1	1	6
Al-Fe-Mo-Ni-V	2	1	1	1	1	6
Al-Fe-Mo-Ni-W	1	1	2	1	1	6
Al-Mn-Mo-Nb-Ni	1	1	2	1	1	6
Al-Mn-Mo-Nb-Zn	1	1	2	1	1	6
Al-Mn-Mo-Ni-V	2	1	1	1	1	6
Al-Mn-Mo-Ni-W	1	1	2	1	1	6
Al-Ni-Ta-Ti-Zr	2	1	1	1	1	6
Al-Ni-Ta-V-Zn	1	1	1	2	1	6
Al-Ni-Ti-V-Zn	1	1	2	1	1	6
Al-Fe-Mo-Si-V	1	1	2	1	1	6
Al-Fe-Mo-Ta-Zr	2	1	1	1	1	6
Al-Fe-Mo-Ti-W	1	1	2	1	1	6
Al-Fe-Mo-Ti-Zr	2	1	1	1	1	6
Al-Fe-Mo-V-Zn	2	1	1	1	1	6
Al-Fe-Mo-W-Zr	2	1	1	1	1	6
Al-Mn-Mo-Si-Ti	1	1	2	1	1	6
Al-Fe-Nb-Ni-Zr	1	1	2	1	1	6
Al-Mn-Mo-Ti-Zr	2	1	1	1	1	6
Al-Mn-Mo-V-Zn	2	1	1	1	1	6
Al-Mn-Nb-Ti-Zn	1	1	2	1	1	6
Al-Mn-Nb-Ti-Zr	1	1	2	1	1	6
Al-Fe-Ni-Ta-V	1	1	1	2	1	6
Al-Fe-Ni-Ta-W	1	1	2	1	1	6
Al-Fe-Ni-Ti-V	1	1	2	1	1	6
Al-Mn-Ni-Ta-V	1	1	1	2	1	6
Al-Mn-Ni-Ta-W	1	1	2	1	1	6
Al-Mn-Ni-Ti-V	1	1	2	1	1	6
As-Cr-Fe-Mo-Ni	2	1	1	1	1	6
Al-Cu-Nb-Ni-Ti	1	1	2	1	1	6
As-Fe-Mn-Mo-Ni	2	1	1	1	1	6
Al-Mn-Ta-V-Zn	1	1	1	2	1	6
Al-Mn-Ta-W-Zn	1	1	2	1	1	6
Al-Mn-Ti-W-Zn	1	1	2	1	1	6
Al-Mn-Ti-W-Zr	1	1	2	1	1	6
Al-Mo-Nb-Ni-Zn	1	1	2	1	1	6
Al-Mo-Nb-Ti-Zn	1	1	2	1	1	6
As-Cr-Mn-Mo-Ni	2	1	1	1	1	6
Co-Cr-Fe-Mo-Ta	2	1	1	1	1	6
Co-Cr-Fe-Mo-Ti	2	1	1	1	1	6
Co-Cr-Fe-Mo-Zn	2	1	1	1	1	6
Co-Cr-Fe-Ni-Si	1	1	2	1	1	6
Co-Fe-Mn-Mo-Ni	2	1	1	1	1	6
Co-Fe-Mn-Mo-Si	2	1	1	1	1	6
Co-Fe-Mn-Mo-Ta	2	1	1	1	1	6
Co-Fe-Mn-Mo-Ti	2	1	1	1	1	6
Co-Fe-Mn-Nb-Zn	1	1	2	1	1	6
Co-Fe-Mn-Ni-Si	1	1	2	1	1	6
Co-Fe-Mo-Ni-Ta	2	1	1	1	1	6
Co-Fe-Mo-Ni-Ti	2	1	1	1	1	6
Co-Fe-Mo-Ni-Zn	2	1	1	1	1	6
Co-Mn-Mo-Ni-Ta	2	1	1	1	1	6
Co-Mn-Mo-Ni-Zn	2	1	1	1	1	6
Cr-Ni-Ta-V-Zn	1	1	1	2	1	6
Cr-Ni-Ta-W-Zn	1	1	2	1	1	6
Cr-Mn-Mo-Nb-Ni	1	1	2	1	1	6
Co-Fe-Mo-Ta-Ti	2	1	1	1	1	6
Cr-Mn-Mo-Nb-Ti	1	1	2	1	1	6
Co-Fe-Mo-Ta-Zn	2	1	1	1	1	6
Co-Fe-Mo-Ti-Zn	2	1	1	1	1	6
Cr-Mn-Mo-Ni-V	2	1	1	1	1	6
Cr-Mn-Mo-Ni-W	1	1	2	1	1	6
Co-Cu-Mn-Mo-Ni	2	1	1	1	1	6
Cr-Fe-Mn-Mo-V	2	1	1	1	1	6
Cr-Fe-Mn-Nb-Ta	1	1	1	2	1	6
Co-Fe-Nb-Ni-Zn	1	1	2	1	1	6
Cr-Fe-Mn-Nb-V	1	1	2	1	1	6
Co-Mn-Mo-Ta-Zn	2	1	1	1	1	6
Cr-Mn-Mo-Ti-V	2	1	1	1	1	6
Cr-Mn-Mo-Ti-W	1	1	2	1	1	6
Cr-Mn-Mo-V-Zn	2	1	1	1	1	6
Cr-Mn-Mo-W-Zr	2	1	1	1	1	6
Cr-Mn-Nb-Ni-Ti	1	1	2	1	1	6
Cr-Fe-Mn-Si-W	1	1	2	1	1	6
Cr-Fe-Mn-Ti-W	1	1	2	1	1	6
Cr-Fe-Mn-V-W	1	1	2	1	1	6
Cr-Fe-Mo-Nb-Si	1	1	2	1	1	6
Cr-Fe-Mo-Nb-Ta	1	1	1	2	1	6
Co-Cu-Mo-Ni-Zn	2	1	1	1	1	6
Cr-Fe-Mo-Ni-V	2	1	1	1	1	6
Cr-Mn-Nb-Ti-Zr	1	1	2	1	1	6
Cr-Fe-Mo-Si-V	2	1	1	1	1	6
Cr-Fe-Mo-Si-W	1	1	2	1	1	6
Cr-Fe-Mo-Ta-W	1	1	1	2	1	6
Cr-Fe-Mo-Ti-W	1	1	2	1	1	6
Cr-Fe-Mo-V-Zn	2	1	1	1	1	6
Co-Cr-Mn-Mo-Ni	2	1	1	1	1	6
Co-Cr-Mn-Mo-Ta	2	1	1	1	1	6
Co-Cr-Mn-Mo-Ti	2	1	1	1	1	6
Co-Cr-Mn-Mo-Zn	2	1	1	1	1	6
Cr-Mn-Ni-Si-V	1	1	2	1	1	6
Cr-Mn-Ni-Ta-V	1	1	1	2	1	6
Cr-Mn-Ni-Ta-W	1	1	2	1	1	6
Cr-Mn-Ni-Ti-W	1	1	2	1	1	6
Cr-Fe-Nb-Ta-Zn	1	1	1	2	1	6
Co-Cr-Mo-Ni-Ta	2	1	1	1	1	6
Co-Cr-Mo-Ni-Zn	2	1	1	1	1	6
Cr-Fe-Ni-Si-V	1	1	2	1	1	6
Cr-Fe-Ni-Si-W	1	1	2	1	1	6
Cr-Fe-Ni-Ta-V	1	1	1	2	1	6
Cr-Fe-Ni-Ta-W	1	1	2	1	1	6
Cr-Fe-Ni-Ti-W	1	1	2	1	1	6
Co-Cr-Mo-Ta-Zn	2	1	1	1	1	6
Cr-Mn-Si-Ti-V	1	1	2	1	1	6
Cr-Mn-Ta-Ti-V	1	1	1	2	1	6
Cr-Mn-Ta-Ti-W	1	1	2	1	1	6
Cr-Mn-Ta-V-Zn	1	1	1	2	1	6
Cr-Mn-Ta-W-Zr	2	1	1	1	1	6
Cr-Mn-Ti-W-Zn	1	1	2	1	1	6
Cr-Mo-Nb-Ni-Ti	1	1	2	1	1	6
Cr-Mo-Nb-Ni-Zn	1	1	2	1	1	6
Cu-Ni-Ta-Ti-V	1	1	1	2	1	6
Cu-Ni-Ta-Ti-Zr	2	1	1	1	1	6
Cr-Mo-Nb-Ti-Zn	1	1	2	1	1	6
Cr-Fe-Ta-Ti-V	1	1	1	2	1	6
Cr-Fe-Ta-Ti-W	1	1	2	1	1	6
Cr-Fe-Ta-V-Zn	1	1	1	2	1	6
Cr-Fe-V-W-Zn	1	1	2	1	1	6
Cr-Mo-Ni-Ti-W	1	1	2	1	1	6
Cr-Mo-Ni-V-Zn	2	1	1	1	1	6
Co-Mo-Ni-Ta-Zn	2	1	1	1	1	6
Co-Cu-Fe-Mo-Ni	2	1	1	1	1	6
Co-Cu-Fe-Nb-Ni	1	1	2	1	1	6
Fe-Mo-Ta-W-Zn	1	1	1	2	1	6
Fe-Mo-Ti-V-Zn	2	1	1	1	1	6
Fe-Mo-Ti-W-Zn	1	1	2	1	1	6
Cr-Mo-Ta-Ti-Zr	2	1	1	1	1	6
Fe-Nb-Ni-Ta-Zn	1	1	1	2	1	6
Fe-Nb-Ni-Ti-Zn	1	1	2	1	1	6
Fe-Nb-Ni-V-Zn	1	1	2	1	1	6
Cr-Mo-Ti-V-Zn	2	1	1	1	1	6
Cr-Mo-Ti-W-Zn	1	1	2	1	1	6
Co-Mo-Ta-Ti-Zn	2	1	1	1	1	6
Co-Cr-Cu-Mo-Ni	2	1	1	1	1	6
Co-Cr-Fe-Mn-Mo	2	1	1	1	1	6
Co-Cr-Fe-Mn-W	1	1	2	1	1	6
Co-Cr-Fe-Mo-Ni	2	1	1	1	1	6
Cr-Ta-Ti-V-Zn	1	1	1	2	1	6
Cr-Ta-Ti-W-Zn	1	1	2	1	1	6
Fe-Ta-Ti-V-Zn	1	1	1	2	1	6
Fe-Ta-Ti-W-Zn	1	1	2	1	1	6
Fe-Mn-Mo-Nb-Si	1	1	2	1	1	6
Fe-Mn-Mo-Nb-Ta	1	1	1	2	1	6
Fe-Mn-Mo-Nb-Ti	1	1	2	1	1	6
Fe-Mn-Mo-Ni-V	2	1	1	1	1	6
Fe-Mn-Mo-Si-V	2	1	1	1	1	6
Fe-Mn-Mo-Si-W	1	1	2	1	1	6
Fe-Mn-Mo-Ta-W	1	1	1	2	1	6
Fe-Mn-Mo-Ti-V	2	1	1	1	1	6
Fe-Mn-Mo-Ti-W	1	1	2	1	1	6
Fe-Mn-Mo-V-Zn	2	1	1	1	1	6
Fe-Mn-Nb-Ni-Ta	1	1	1	2	1	6
Fe-Mn-Nb-Ni-Ti	1	1	2	1	1	6
Fe-Mn-Nb-Ni-V	1	1	2	1	1	6
Cu-Nb-Ni-Ta-Zn	1	1	1	2	1	6
Cu-Nb-Ni-Ti-Zn	1	1	2	1	1	6
Cu-Nb-Ni-Ti-Zr	1	1	2	1	1	6
Cu-Nb-Ni-V-Zn	1	1	2	1	1	6
Fe-Mn-Ni-Si-W	1	1	2	1	1	6
Fe-Mn-Ni-Ta-V	1	1	1	2	1	6
Fe-Mn-Ni-Ti-W	1	1	2	1	1	6
Fe-Mn-Ni-V-W	1	1	2	1	1	6
Fe-Ni-Ta-Ti-V	1	1	1	2	1	6
Fe-Ni-Ta-Ti-W	1	1	2	1	1	6
Fe-Ni-Ta-V-Zn	1	1	1	2	1	6
Cu-Ta-Ti-Zn-Zr	2	1	1	1	1	6
Mn-Ni-Ta-Ti-W	1	1	2	1	1	6
Mn-Ni-Ta-V-Zn	1	1	1	2	1	6
Mn-Ni-V-W-Zn	1	1	2	1	1	6
Fe-Mn-Ta-Ti-V	1	1	1	2	1	6
Fe-Mn-Ta-Ti-W	1	1	2	1	1	6
Fe-Mn-Ta-V-Zn	1	1	1	2	1	6
Fe-Mn-V-W-Zn	1	1	2	1	1	6
Fe-Mo-Nb-Ni-Si	1	1	2	1	1	6
Fe-Mo-Nb-Ni-Ta	1	1	1	2	1	6
Fe-Mo-Nb-Ni-Ti	1	1	2	1	1	6
Fe-Mo-Nb-Ta-Zn	1	1	1	2	1	6
Fe-Mo-Nb-Ti-Zn	1	1	2	1	1	6
Fe-Mo-Ni-Si-V	2	1	1	1	1	6
Fe-Mo-Ni-Si-W	1	1	2	1	1	6
Fe-Mo-Ni-Ta-W	1	1	1	2	1	6
Fe-Mo-Ni-Ti-V	2	1	1	1	1	6
Fe-Mo-Ni-Ti-W	1	1	2	1	1	6
Fe-Mo-Ni-V-Zn	2	1	1	1	1	6
Nb-Ni-Sn-Ta-Zn	1	1	1	2	1	6
Nb-Ni-Sn-V-Zn	1	1	2	1	1	6
Nb-Ni-Ti-Zn-Zr	1	1	2	1	1	6
Mo-Ni-Ta-Ti-Zr	2	1	1	1	1	6
Mo-Ni-Ti-V-Zn	2	1	1	1	1	6
Mo-Ni-Ti-W-Zn	1	1	2	1	1	6
Mo-Ni-Ti-Zn-Zr	2	1	1	1	1	6
Mn-Mo-Nb-Ni-Ti	1	1	2	1	1	6
Mn-Mo-Nb-Ta-Zn	1	1	1	2	1	6
Mn-Mo-Nb-Ti-Zn	1	1	2	1	1	6
Mn-Mo-Ni-Ti-V	2	1	1	1	1	6
Mn-Mo-Ni-Ti-W	1	1	2	1	1	6
Mn-Mo-Ni-V-Zn	2	1	1	1	1	6
Mg-Ni-Ti-Zn-Zr	1	1	2	1	1	6
Mn-Mo-Ta-W-Zn	1	1	1	2	1	6
Mn-Mo-Ti-V-Zn	2	1	1	1	1	6
Mn-Mo-Ti-W-Zn	1	1	2	1	1	6
Mn-Nb-Ni-Ta-Zn	1	1	1	2	1	6
Mn-Nb-Ni-Ti-Zn	1	1	2	1	1	6
Mn-Nb-Ni-V-Zn	1	1	2	1	1	6
Mn-Ta-Ti-V-Zn	1	1	1	2	1	6
Mn-Ta-Ti-W-Zn	1	1	2	1	1	6
Ni-Si-Ta-Ti-Zr	2	1	1	1	1	6
Mo-Nb-Ni-Ti-Zn	1	1	2	1	1	6
Mo-Nb-Ni-Zn-Zr	2	1	1	1	1	6
Ni-Ta-Ti-V-Zn	1	1	1	2	1	6
Ni-Ta-Ti-Zn-Zr	2	1	1	1	1	6
