# Supplementary material for: The most sustainable high entropy alloys for the future
Source: Research Square preprint supplement (doi:10.21203/rs.3.rs-3553470/v1), 2023-12-11
Supplement: Supplementary file 4 [file fe2288b0c126458802429835.xlsx]

## Sheet: Sheet1
index	C_avg_Decile	FCO2_Decile	SR_Decile	P_avg_Decile	R_avg_Decile	HERowS_Score
Al-Au-Cu-Pd-Ta	2	8	1	3	3	17
Al-Mo-Ni-Ta-Zn	1	1	1	1	1	5
Al-Ir-Mo-Os-Ta	6	5	7	9	9	36
Al-Ir-Mo-Os-Ti	5	5	8	9	9	36
Al-Au-Cu-Pd-V	3	8	1	3	3	18
Al-Ir-Mo-Os-V	9	5	9	9	9	41
Al-Pd-Ti-Y-Zr	5	5	3	2	2	17
Al-Ir-Mo-Os-W	6	5	9	9	9	38
Al-Pd-Ti-Zn-Zr	4	5	1	2	2	14
Al-Ir-Mo-Os-Zn	6	5	7	9	9	36
Al-Ir-Mo-Os-Zr	9	5	7	9	9	39
Al-Co-Ir-V-W	6	3	9	1	1	20
Al-Mo-Ni-Ti-V	2	1	2	1	1	7
Al-Mo-Ni-Ti-W	1	1	3	1	1	7
Al-Mo-Ni-Ti-Zn	1	1	1	1	1	5
Al-Mo-Ni-Ti-Zr	2	1	1	1	1	6
Al-Ir-Mo-Pd-Pt	6	10	5	4	4	29
Al-Pt-Re-Rh-Ru	8	10	8	8	8	42
Al-Ir-Mo-Pd-Re	9	6	3	5	7	30
Al-Mo-Ni-V-W	2	1	4	1	1	9
Al-Ir-Mo-Pd-Rh	9	8	6	7	4	34
Al-Ir-Mo-Pd-Ru	9	6	8	3	5	31
Al-Mo-Ni-V-Zn	2	1	1	1	1	6
Al-Pt-Re-Rh-Ta	5	10	4	8	7	34
Al-Pt-Re-Rh-Ti	4	10	5	8	7	34
Al-Ir-Mo-Pd-Ta	6	6	3	3	3	21
Al-Pt-Re-Rh-V	7	10	5	8	7	37
Al-Ir-Mo-Pd-Ti	5	6	4	2	3	20
Al-Pt-Re-Rh-W	4	10	7	8	7	36
Al-Ir-Mo-Pd-Zr	9	6	3	2	3	23
Al-Ir-Mo-Pt-Re	6	10	5	6	7	34
Al-Fe-Si-V-W	1	1	4	1	1	8
Al-Ir-Mo-Pt-Rh	6	10	8	7	4	35
Al-Ir-Mo-Pt-Ru	6	10	9	3	5	33
Al-Mo-Os-Pd-Pt	6	10	5	9	9	39
Al-Mo-Os-Pd-Re	9	6	3	10	10	38
Al-Mo-Os-Pd-Ru	9	6	8	9	10	42
Al-Ir-Mo-Pt-Ta	3	9	5	3	3	23
Al-Pt-Re-Ru-Ta	5	9	5	6	8	33
As-Au-Ga-Pd-Sb	10	8	4	4	3	29
Al-Mo-Os-Pd-Ta	6	6	3	9	9	33
Al-Cu-Nb-Ta-Ti	1	1	2	2	1	7
Al-Ir-Mo-Pt-Ti	2	9	6	3	3	23
Al-Cu-Nb-Ta-V	1	1	3	2	1	8
Al-Ir-Mo-Pt-V	5	9	7	3	3	27
Al-Pt-Re-Ru-Ti	4	9	6	6	8	33
Al-Ir-Mo-Pt-W	2	9	8	3	3	25
Al-Pt-Re-Ru-V	7	9	7	6	8	37
Al-Mo-Os-Pd-W	6	6	6	9	9	36
Al-Pt-Re-Ru-W	4	9	8	6	8	35
As-Au-Ga-Pd-Te	10	8	3	4	4	29
Al-Ir-Mo-Pt-Zr	6	9	4	3	3	25
Al-Ir-Mo-Re-Rh	9	8	6	8	7	38
Al-Mo-Os-Pd-Zr	9	6	3	9	9	36
Al-Ir-Mo-Re-Ru	9	5	7	5	8	34
Al-Mo-Os-Pt-Re	6	10	5	10	10	41
Al-Ir-Mo-Re-Sc	9	5	5	7	8	34
Al-Mo-Os-Pt-Rh	6	10	8	10	9	43
Al-Ir-Mo-Re-Si	5	4	4	5	6	24
Al-Mo-Os-Pt-Ru	6	10	9	9	10	44
Al-Mo-Os-Pt-Sc	6	10	7	10	10	43
Al-Ir-Mo-Re-Ta	6	4	3	5	6	24
Al-Mo-Os-Pt-Ta	3	10	5	9	9	36
Ag-Hf-Hg-In-Ti	6	1	3	4	4	18
Al-Ir-Mo-Re-Ti	5	4	4	5	6	24
Al-Cu-Nb-Ti-V	1	1	4	1	1	8
Al-Mo-Os-Pt-Ti	2	9	6	9	9	35
Al-Ir-Mo-Re-V	9	4	5	5	6	29
Al-Fe-Ta-Ti-V	1	1	2	2	1	7
Al-Mo-Os-Pt-V	5	9	7	9	9	39
Al-Ir-Mo-Re-W	6	4	6	5	6	27
Al-Fe-Ta-Ti-W	1	1	3	1	1	7
Al-Cu-Nb-Ti-Zn	1	1	2	1	1	6
Al-Mo-Os-Pt-W	2	9	8	9	9	37
Al-Fe-Ta-Ti-Zn	1	1	1	1	1	5
Al-Cu-Nb-Ti-Zr	1	1	2	1	1	6
Al-Mo-Os-Pt-Zn	2	9	4	9	9	33
Al-Fe-Ta-Ti-Zr	1	1	1	1	1	5
Al-Ir-Mo-Re-Zn	6	4	3	5	6	24
Al-Mo-Os-Pt-Zr	6	9	4	9	9	37
Al-Ir-Mo-Re-Zr	9	4	3	5	6	27
Al-Mo-Os-Re-Rh	9	8	6	10	10	43
Al-Fe-Ta-V-W	1	1	3	2	1	8
Al-Cr-Mn-Mo-Nb	1	1	2	1	1	6
Al-Cr-Mn-Mo-Ni	1	1	1	1	1	5
Al-Mo-Os-Re-Ru	9	5	7	10	10	41
Al-Ir-Mo-Rh-Ru	9	7	9	7	5	37
Al-Fe-Ta-V-Zn	1	1	1	1	1	5
Al-Cr-Mn-Mo-Os	2	3	3	8	8	24
Al-Pt-Re-Sc-Ti	4	9	4	7	8	32
Al-Fe-Ta-V-Zr	4	1	1	2	1	9
Al-Mo-Os-Re-Sc	9	5	5	10	10	39
Al-Mo-Os-Re-Si	5	4	4	10	10	33
Al-Cr-Mn-Mo-Pt	1	8	1	3	2	15
Al-Fe-Ta-W-Zn	1	1	2	1	1	6
Al-Cr-Mn-Mo-Re	2	2	1	4	6	15
Al-Fe-Ta-W-Zr	2	1	2	1	1	7
Al-Mo-Os-Re-Ta	6	5	3	10	10	34
Al-Cr-Mn-Mo-Ru	2	1	3	1	4	11
Al-Co-Mg-Os-Ru	7	4	10	8	9	38
Al-Mo-Os-Re-Ti	5	4	4	10	10	33
Al-Ir-Mo-Rh-Ta	6	7	6	7	4	30
Al-Mo-Os-Re-V	9	4	5	10	10	38
Al-Cr-Mn-Mo-Ta	1	1	1	1	1	5
Al-Mo-Os-Re-W	6	4	6	10	10	36
Al-Ir-Mo-Rh-Ti	5	7	7	6	4	29
Al-Mo-Os-Re-Zn	6	4	3	10	10	33
Al-Cu-Ni-Os-Pt	1	9	4	9	9	32
Al-Cr-Mn-Mo-Ti	1	1	1	1	1	5
Al-Cu-Ni-Os-Re	4	4	2	10	10	30
Al-Mo-Os-Re-Zr	9	4	3	10	10	36
Al-Cr-Mn-Mo-V	2	1	1	1	1	6
Al-Mo-Os-Rh-Ru	9	8	9	10	10	46
Al-Cu-Ni-Os-Ru	4	4	7	8	9	32
Al-Cr-Mn-Mo-W	1	1	2	1	1	6
Al-Ir-Mo-Rh-Zr	9	7	5	6	4	31
Al-Cr-Mn-Nb-Ni	1	1	2	1	1	6
Al-Mo-Os-Rh-Ta	6	7	6	10	9	38
Al-Cr-Mn-Nb-Os	1	3	6	8	8	26
Ag-Bi-Ga-In-Mg	9	1	9	2	4	25
Ag-As-Pd-Sb-Te	10	5	1	4	3	23
Al-Mo-Os-Rh-V	9	7	8	10	9	43
Al-Cr-Mn-Nb-Re	1	2	2	4	6	15
Al-Mo-Os-Rh-W	6	7	9	10	9	41
Al-Fe-Ti-V-W	1	1	4	1	1	8
Al-Ir-Mo-Ru-Ta	6	4	7	2	5	24
Al-Pt-Re-Ta-Ti	2	9	2	6	7	26
Ag-As-Pd-Sb-Zn	9	5	1	2	2	19
Al-Fe-Ti-V-Zn	1	1	1	1	1	5
Al-Pt-Re-Ta-V	5	9	3	6	7	30
Al-Ir-Mo-Ru-Ti	5	4	8	1	5	23
Al-Pt-Re-Ta-W	2	9	4	6	7	28
Al-Mo-Os-Ru-Sc	9	5	9	10	10	43
Al-Ir-Mo-Ru-V	9	4	9	1	5	28
Al-Mo-Os-Ru-Si	5	4	9	8	9	35
Al-Ir-Mo-Ru-W	6	4	9	1	5	25
Al-Cr-Mn-Nb-Ta	1	1	2	2	1	7
Al-Mo-Os-Ru-Ta	6	5	7	9	10	37
Al-Ir-Mo-Ru-Zn	6	4	7	1	5	23
Al-Ir-Mo-Ru-Zr	9	4	7	1	5	26
Al-Mo-Os-Ru-Ti	5	4	8	8	9	34
Al-Cr-Mn-Nb-Ti	1	1	3	1	1	7
Al-Mo-Os-Ru-V	9	4	9	8	9	39
Al-Cr-Mn-Nb-V	1	1	3	1	1	7
Al-Fe-V-W-Zr	3	1	3	1	1	9
Al-Mo-Os-Ru-W	6	4	9	8	9	36
Al-Cr-Mn-Nb-W	1	1	5	1	1	9
Al-Mo-Os-Ru-Zn	6	4	7	8	9	34
Al-Pt-Re-Ti-V	3	9	4	6	7	29
Al-Mo-Os-Ru-Zr	9	4	7	8	9	37
Al-Pt-Re-Ti-W	1	9	5	6	7	28
Al-Pt-Re-Ti-Zn	1	9	2	5	7	24
Al-Cr-Mn-Ni-Os	1	3	3	8	8	23
Al-Pt-Re-Ti-Zr	4	9	2	5	7	27
Al-Ir-Mo-Sc-Ta	6	4	5	6	6	27
Al-Pt-Re-V-W	3	9	6	6	7	31
Al-Cr-Mn-Ni-Pt	1	8	1	3	2	15
Al-Ir-Mo-Sc-Ti	5	3	6	6	6	26
Al-Cr-Mn-Ni-Re	1	1	1	4	6	13
Al-Mo-Os-Sc-Ta	6	4	5	10	10	35
Al-Ir-Mo-Sc-W	6	3	8	6	6	29
Al-Cr-Mn-Ni-Ru	1	1	3	1	4	10
Al-Mo-Os-Sc-Ti	5	4	6	10	10	35
Al-Mo-Os-Sc-V	9	4	6	10	10	39
Al-Pt-Re-W-Zr	4	9	3	6	7	29
Al-Ir-Mo-Sc-Zr	9	3	4	6	6	28
Al-Mo-Os-Sc-W	6	4	8	10	10	38
Al-Ir-Mo-Si-Ta	2	3	4	2	2	13
Al-Mo-Os-Sc-Zr	9	4	4	10	10	37
Al-Ir-Mo-Si-Ti	2	3	5	1	1	12
Al-Cr-Mn-Ni-Ti	1	1	1	1	1	5
Al-Mo-Os-Si-Ta	2	4	4	9	8	27
Al-Au-Cu-Ta-Ti	1	8	1	2	2	14
Al-Ir-Mo-Si-V	5	3	6	1	1	16
Al-Ir-Mo-Si-W	2	3	7	1	1	14
Al-Mo-Os-Si-Ti	2	3	5	8	8	26
Al-Au-Cu-Ta-V	2	8	1	2	2	15
Al-Cu-Ni-Pd-Ta	2	5	1	3	2	13
Al-Mo-Os-Si-V	5	3	6	8	8	30
Al-Ge-Mn-Mo-Ta	3	1	2	1	5	12
Al-Mo-Os-Si-W	2	3	7	8	8	28
Al-Au-Cu-Ta-Zn	1	8	1	2	2	14
Al-Ge-Mn-Mo-V	5	1	3	1	5	15
Al-Cr-Mn-Os-Pt	1	9	5	9	9	33
Al-Cr-Mn-Os-Re	3	4	3	10	10	30
Al-Pt-Rh-Ru-V	7	10	9	7	5	38
Al-Cr-Mn-Os-Ru	3	4	7	8	9	31
Al-Pt-Rh-Ru-W	4	10	10	7	5	36
Al-Mo-Os-Ta-Ti	2	4	4	9	8	27
Al-Ir-Mo-Ta-Ti	2	3	4	2	2	13
Al-Cr-Mn-Os-Ta	2	4	3	9	8	26
Al-Mo-Os-Ta-V	6	4	5	9	8	32
Al-Ir-Mo-Ta-V	6	3	5	2	2	18
Al-Cr-Mn-Os-Ti	1	3	4	8	8	24
Al-Cr-Mn-Os-V	3	3	4	8	8	26
Al-Mo-Os-Ta-W	3	4	6	9	8	30
Al-Au-Cu-Ti-V	1	8	1	1	2	13
Al-Ir-Mo-Ta-W	3	3	6	2	2	16
Al-Cr-Mn-Os-W	1	3	6	8	8	26
Al-Cr-Mn-Os-Zn	1	3	2	8	8	22
Al-Mo-Os-Ta-Zn	3	4	3	9	8	27
Al-Ir-Mo-Ta-Zn	3	3	3	2	2	13
Al-Mo-Os-Ta-Zr	6	4	3	9	8	30
Al-Ir-Mo-Ta-Zr	6	3	3	2	2	16
Al-Au-Cu-Ti-Zn	1	8	1	1	2	13
Ag-Ga-Mg-Sn-Zn	3	1	5	2	1	12
Al-As-Au-Ge-Pd	8	8	2	3	6	27
Al-Mo-Os-Ti-V	5	3	6	8	8	30
As-Au-Ge-Hf-Si	8	8	2	4	5	27
Al-Mo-Os-Ti-W	2	3	7	8	8	28
Al-Ir-Mo-Ti-V	5	3	6	1	1	16
Al-Au-Cu-V-Zn	1	8	1	1	2	13
Al-Mo-Os-Ti-Zn	2	3	3	8	8	24
Al-Ir-Mo-Ti-W	2	3	7	1	1	14
Al-Mo-Os-Ti-Zr	5	3	3	8	8	27
Al-Pt-Rh-Sc-Ta	5	10	6	8	7	36
Al-Cu-Ni-Pt-W	1	8	3	3	2	17
Al-Mo-Os-V-W	5	3	8	8	8	32
Al-Ir-Mo-Ti-Zn	2	3	3	1	1	10
Al-Mo-Os-V-Zn	5	3	4	8	8	28
Al-Ir-Mo-Ti-Zr	5	3	3	1	1	13
Al-Mo-Os-V-Zr	9	3	4	8	8	32
Al-Ir-Mo-V-W	5	3	8	1	1	18
Al-Mo-Os-W-Zn	2	3	5	8	8	26
As-Au-Ge-Hg-Pd	8	8	5	3	6	30
Al-Mo-Os-W-Zr	6	3	5	8	8	30
Al-Ir-Mo-V-Zn	5	3	4	1	1	14
Al-Ir-Mo-V-Zr	9	3	4	1	1	18
Al-Ir-Mo-W-Zr	6	3	5	1	1	16
Ag-Nb-Ti-Zn-Zr	3	1	1	1	1	7
Al-Ir-Nb-Ni-Os	3	5	10	9	9	36
As-Au-Ge-In-Pd	10	8	2	4	7	31
Al-Ir-Nb-Ni-Pd	3	6	7	2	3	21
Al-Cr-Mn-Pt-Ta	1	9	2	3	2	17
Al-Ir-Nb-Ni-Pt	1	9	8	3	3	24
Ag-Au-In-Nb-Pd	6	8	2	4	4	24
Al-Ir-Nb-Ni-Re	3	4	6	5	6	24
Al-Ir-Nb-Ni-Ru	3	4	10	1	5	23
Al-Ir-Nb-Ni-Sc	3	4	8	6	6	27
Ag-Cd-Cu-Nb-Pd	6	5	1	2	3	17
Al-Cr-Mn-Re-Ru	3	2	3	5	7	20
Al-Ir-Nb-Ni-Ta	2	3	6	2	2	15
Al-Cr-Mn-Re-Si	1	1	1	4	6	13
Al-Ir-Nb-Ni-Ti	1	3	7	1	1	13
Al-Ge-Mn-Os-V	6	4	7	8	10	35
Al-Ir-Nb-Ni-V	3	3	8	1	1	16
Al-Cr-Mn-Re-Ta	2	2	1	5	6	16
Al-Pt-Rh-Ta-Ti	2	10	5	7	4	28
Al-Ir-Nb-Ni-W	1	3	9	1	1	15
Al-Pt-Rh-Ta-V	5	10	6	7	4	32
Al-Co-Mn-Mo-Ni	2	1	1	1	1	6
Al-Cr-Mn-Re-Ti	1	2	1	4	6	14
Al-Co-Mn-Mo-Os	5	3	5	8	8	29
Al-Pt-Rh-Ta-W	2	10	7	7	4	30
Al-Cr-Mn-Re-V	3	2	1	4	6	16
Al-Ir-Nb-Ni-Zn	1	3	6	1	1	12
Al-Co-Mn-Mo-Pt	2	8	3	3	2	18
Al-Cr-Mn-Re-W	1	2	2	4	6	15
Al-Co-Mn-Mo-Re	5	2	1	4	6	18
Al-Ir-Nb-Ni-Zr	3	3	6	1	1	14
Al-Cr-Mn-Re-Zn	1	1	1	4	6	13
Al-Co-Mn-Mo-Ru	5	1	5	1	4	16
Al-Cr-Mn-Re-Zr	3	2	1	4	6	16
Al-Ir-Nb-Os-Pd	7	6	10	9	9	41
As-Au-Ge-Mg-Pd	8	8	4	3	6	29
Al-Pt-Rh-Ta-Zr	5	10	3	7	4	29
Al-Ir-Nb-Os-Pt	4	10	10	9	9	42
Al-Ir-Nb-Os-Re	7	6	10	10	10	43
Al-Ir-Nb-Os-Rh	7	8	10	10	9	44
Al-Ir-Nb-Os-Ru	7	6	10	9	10	42
Al-Ir-Nb-Os-Sc	7	6	10	10	10	43
Al-Ir-Nb-Os-Si	3	5	10	9	9	36
Al-Co-Mn-Nb-Os	3	3	8	8	8	30
Al-Pt-Rh-Ti-V	3	10	6	7	4	30
Al-Pt-Rh-Ti-W	1	10	8	7	4	30
Al-Ir-Nb-Os-Ta	5	5	10	9	9	38
Al-Co-Mn-Nb-Pt	1	8	6	3	2	20
Al-Co-Mn-Nb-Re	3	2	4	4	6	19
Al-Ir-Nb-Os-Ti	3	5	10	9	9	36
Al-Ir-Nb-Os-V	6	5	10	9	9	39
Al-Ir-Nb-Os-W	4	5	10	9	9	37
Al-Ir-Nb-Os-Y	5	5	10	9	9	38
Al-Ir-Nb-Os-Zn	4	5	9	9	9	36
Al-Ir-Nb-Os-Zr	7	5	9	9	9	39
Ag-Cd-Cu-Pd-Pt	7	10	1	4	4	26
Al-Cr-Mn-Ru-V	3	2	5	1	4	15
Al-Cr-Mn-Ru-W	1	2	6	1	4	14
Al-Co-Mn-Ni-Os	3	3	5	8	8	27
Al-Co-Mn-Ni-Re	3	2	1	4	6	16
Al-Co-Mn-Ni-Ru	3	1	5	1	4	14
Al-Ir-Nb-Pd-Pt	4	10	8	4	4	30
Al-Ir-Nb-Pd-Re	7	6	7	5	7	32
Al-Ir-Nb-Pd-Rh	7	8	9	7	4	35
Al-Ir-Nb-Pd-Ru	7	6	10	3	5	31
Ag-Cd-Cu-Pt-Rh	7	10	2	7	4	30
Al-Ir-Nb-Pd-Sc	7	6	8	6	7	34
Al-Co-Mn-Ni-V	2	1	2	1	1	7
Al-Cr-Mn-Si-V	1	1	2	1	1	6
Al-Cr-Mn-Si-W	1	1	3	1	1	7
Al-Ir-Nb-Pd-Ta	5	6	7	3	3	24
Al-Ge-Mn-Re-Ta	5	2	2	5	8	22
Al-Ge-Mn-Re-Ti	3	2	2	4	8	19
Al-Ir-Nb-Pd-Ti	3	6	8	2	3	22
Al-Ge-Mn-Re-V	6	2	3	4	8	23
Al-Ir-Nb-Pd-V	6	6	8	3	3	26
Al-Co-Mn-Os-Re	7	4	5	10	10	36
Al-Ir-Nb-Pd-W	3	6	9	3	3	24
Ag-Hf-Hg-Ti-Zn	3	1	2	4	1	11
Al-Co-Mn-Os-Ru	7	4	9	8	9	37
Al-Mo-Pd-Pt-Re	6	10	2	6	7	31
Ag-Hf-Hg-Ti-Zr	6	1	2	4	1	14
Al-Cr-Mn-Ta-Ti	1	1	1	1	1	5
Al-Mo-Pd-Pt-Rh	6	10	4	7	4	31
Al-Ir-Nb-Pd-Zr	7	6	6	2	3	24
Al-Cr-Mn-Ta-V	1	1	1	1	1	5
Al-Mo-Pd-Pt-Ru	6	10	5	4	5	30
Al-Cr-Mn-Ta-W	1	1	2	1	1	6
Al-Ir-Nb-Pt-Re	4	10	8	6	7	35
As-Au-Ge-Ni-Te	8	8	2	2	6	26
Al-Cr-Mn-Ta-Zn	1	1	1	1	1	5
Al-Co-Mn-Os-V	6	3	6	8	8	31
Al-Co-Mn-Os-W	3	3	8	8	8	30
Al-Ir-Nb-Pt-Ru	4	10	10	3	5	32
Al-Ir-Nb-Pt-Sc	4	10	9	6	7	36
Al-Cu-Ni-Ta-Ti	1	1	1	1	1	5
Al-Mo-Pd-Pt-Ta	3	10	2	4	3	22
Al-Cr-Mn-Ti-V	1	1	2	1	1	6
Al-Ir-Nb-Pt-Ta	2	9	8	3	3	25
Al-Cr-Mn-Ti-W	1	1	3	1	1	7
Al-Ir-Nb-Pt-Ti	1	9	9	3	3	25
Al-Mo-Pd-Pt-Ti	2	10	2	4	3	21
As-Au-Ge-Pb-Pd	8	8	2	3	6	27
Al-Ir-Nb-Pt-V	3	9	9	3	3	27
Al-Cr-Mn-V-W	1	1	3	1	1	7
Al-Mo-Pd-Pt-V	5	10	3	4	3	25
Al-Ir-Nb-Pt-W	1	9	10	3	3	26
Al-Mo-Pd-Pt-W	2	10	4	4	3	23
Al-Ir-Nb-Pt-Zn	1	9	8	3	3	24
Al-Ir-Nb-Pt-Zr	4	9	8	3	3	27
Al-Ir-Nb-Re-Rh	7	8	9	8	7	39
Al-Pt-Ru-Ta-Ti	2	9	6	3	5	25
Al-Cr-Mo-Nb-Ni	1	1	2	1	1	6
Al-Ir-Nb-Re-Ru	7	5	10	5	8	35
Al-Pt-Ru-Ta-V	5	9	7	3	5	29
Al-Cr-Mo-Nb-Os	2	3	6	8	8	27
Al-Mo-Pd-Re-Rh	9	8	2	8	7	34
Al-Mo-Pd-Re-Ru	9	6	3	5	8	31
Al-Pt-Ru-Ta-W	2	9	8	3	5	27
Al-Ir-Nb-Re-Sc	7	5	8	7	8	35
As-Au-Ge-Pd-Sb	10	8	2	3	6	29
Al-Ir-Nb-Re-Si	3	4	8	5	6	26
As-Au-Ge-Pd-Si	8	8	3	3	6	28
Al-Cr-Mo-Nb-Re	2	2	2	4	6	16
Ag-Al-Hf-Ti-Zn	3	1	1	4	1	10
As-Au-Ge-Pd-Sn	8	8	1	3	6	26
Ag-Al-Hf-Ti-Zr	6	1	1	4	1	13
Al-Ir-Nb-Re-Ta	5	4	6	5	6	26
As-Au-Ge-Pd-Te	10	8	2	4	7	31
Al-Cr-Mo-Nb-Ru	2	2	6	1	4	15
Al-Mo-Pd-Re-Ti	5	6	1	5	7	24
Al-Ir-Nb-Re-Ti	3	4	7	5	6	25
Al-Ir-Nb-Re-V	6	4	8	5	6	29
As-Au-Ge-Pd-Zn	8	8	1	3	6	26
Al-Cr-Mo-Nb-Ta	1	1	2	2	1	7
Al-Ir-Nb-Re-W	4	4	9	5	6	28
Al-Cr-Mo-Nb-Ti	1	1	3	1	1	7
Al-Pt-Ru-Ti-V	3	9	8	3	5	28
Al-Mo-Pd-Re-Zr	9	6	1	5	7	28
Al-Ir-Nb-Re-Zn	4	4	6	5	6	25
Al-Cr-Mo-Nb-V	2	1	3	1	1	8
Al-Mo-Pd-Rh-Ru	9	8	6	7	5	35
Al-Ir-Nb-Re-Zr	7	4	6	5	6	28
Al-Cr-Mo-Nb-W	1	1	5	1	1	9
Al-Ir-Nb-Rh-Ru	7	8	10	7	5	37
Al-Co-Mn-Pt-V	3	8	4	3	2	20
Al-Cr-Mo-Ni-Os	2	3	3	8	8	24
Al-Mo-Pd-Rh-Ta	6	8	2	7	4	27
Al-Ir-Nb-Rh-Sc	7	7	10	8	7	39
Al-Pt-Ru-V-W	3	9	9	3	5	29
Al-Cr-Mo-Ni-Pt	1	8	2	3	2	16
Al-Mo-Pd-Rh-Ti	5	8	3	7	4	27
Al-Cr-Mo-Ni-Re	2	2	1	4	6	15
Al-Co-Mn-Re-Ru	7	2	5	5	7	26
Al-Ir-Nb-Rh-Ta	5	7	9	7	4	32
Al-Cr-Mo-Ni-Ru	2	1	3	1	4	11
Al-Ge-Mn-Ta-W	2	1	4	2	5	14
Al-Ir-Nb-Rh-Ti	3	7	9	6	4	29
Al-Ir-Nb-Rh-V	6	7	10	7	4	34
Al-Cr-Mo-Ni-Ta	1	1	1	1	1	5
Al-Ir-Nb-Rh-W	4	7	10	7	4	32
Al-Co-Mn-Re-W	3	2	4	4	6	19
Al-Cr-Mo-Ni-Ti	1	1	1	1	1	5
Al-Cr-Mo-Ni-V	2	1	1	1	1	6
Al-Cr-Mo-Ni-W	1	1	2	1	1	6
Al-Ir-Nb-Rh-Zr	7	7	8	6	4	32
Al-Ge-Mn-V-W	3	1	6	1	5	16
Al-Cr-Mo-Os-Pt	2	9	5	9	9	34
Al-Cr-Mo-Os-Re	5	4	3	10	10	32
Al-Ir-Nb-Ru-Ta	5	4	10	2	5	26
As-Au-Ge-Sb-Te	10	8	2	2	6	28
Al-Cr-Mo-Os-Ru	5	4	7	8	9	33
Al-Cr-Mo-Os-Sc	5	4	5	10	10	34
Al-Ir-Nb-Ru-Ti	3	4	10	1	5	23
Al-Ir-Nb-Ru-V	6	4	10	1	5	26
Al-Cr-Mo-Os-Ta	2	4	3	9	8	26
Al-Ge-Mo-Nb-Os	5	4	8	8	10	35
Al-Ir-Nb-Ru-W	4	4	10	1	5	24
Al-Cr-Mo-Os-Ti	2	3	4	8	8	25
As-Au-Ge-Sc-Te	10	8	3	6	8	35
Al-Cr-Mo-Os-V	5	3	5	8	8	29
Al-Ge-Mo-Nb-Re	5	2	4	5	8	24
Al-Au-Fe-Mn-Nb	1	8	1	1	2	13
Al-Cr-Mo-Os-W	2	3	6	8	8	27
Al-Ir-Nb-Ru-Zr	7	4	9	1	5	26
Al-Co-Mn-Ru-W	3	2	8	1	4	18
Al-Cr-Mo-Os-Zn	2	3	3	8	8	24
Al-Cr-Mo-Os-Zr	5	3	3	8	8	27
As-Au-Ge-Si-Te	8	8	3	2	6	27
As-Au-Ge-Si-Ti	3	8	3	1	5	20
Al-Ge-Mo-Nb-Ta	2	1	5	2	5	15
Al-Ge-Mo-Nb-V	5	1	6	1	5	18
Ag-Ni-Pd-Pt-Te	7	10	1	4	4	26
Al-Cr-Mo-Pd-Pt	2	10	2	4	3	21
Al-Au-Fe-Mn-Ti	1	8	1	1	2	13
Al-Ir-Nb-Sc-Ta	5	4	8	6	6	29
Al-As-Au-Pd-Te	8	8	1	4	4	25
Al-Au-Fe-Mn-V	1	8	1	1	2	13
Al-Ir-Nb-Sc-Ti	3	4	9	6	6	28
Al-Cu-Os-Re-Ru	8	5	7	10	10	40
Al-Ir-Nb-Sc-V	6	4	9	6	6	31
Al-Ir-Nb-Sc-W	4	4	10	6	6	30
Al-Cu-Os-Re-Sc	8	5	4	10	10	37
Al-Au-Fe-Mo-Nb	1	8	1	1	2	13
Al-Ir-Nb-Sc-Y	5	4	10	6	6	31
Al-Au-Fe-Mo-Ni	1	8	1	1	2	13
Al-Au-Fe-Mo-Pd	2	8	1	3	3	17
Al-Ir-Nb-Sc-Zr	7	4	7	6	6	30
Al-Au-Fe-Mo-Pt	1	10	1	3	3	18
Al-Cr-Mo-Pt-Re	2	9	2	5	7	25
Al-Cu-Os-Re-Zr	8	4	2	10	10	34
Al-Cr-Mo-Pt-Rh	2	10	4	7	4	27
Al-Ir-Nb-Si-W	1	3	10	1	1	16
Al-Au-Fe-Mo-Ta	1	8	1	2	2	14
Al-Cr-Mo-Pt-Ru	2	9	5	3	5	24
Al-Mo-Pd-Ta-Ti	2	5	1	3	2	13
Al-Mo-Pd-Ta-V	6	5	2	3	2	18
Al-Au-Fe-Nb-Ni	1	8	1	1	2	13
Al-Mo-Pd-Ta-Zn	3	5	1	3	2	14
Al-Au-Fe-Nb-Os	1	8	4	9	9	31
Al-Cr-Mo-Pt-V	2	8	3	3	2	18
Al-Ge-Mo-Os-V	9	4	7	8	10	38
Al-Cr-Mo-Pt-W	1	8	4	3	2	18
Al-Au-Fe-Nb-Pd	1	8	1	3	3	16
Al-Cu-Os-Ru-Sc	8	5	8	10	10	41
Al-Au-Fe-Nb-Pt	1	10	2	3	3	19
Al-Ir-Nb-Ta-Ti	2	3	7	2	2	16
Al-Au-Fe-Nb-Re	1	8	1	5	6	21
Al-Cr-Mo-Re-Ru	5	2	3	5	7	22
Al-Ir-Nb-Ta-V	4	3	8	2	2	19
Al-Cr-Mo-Re-Sc	5	2	1	7	8	23
Al-Ir-Nb-Ta-W	2	3	9	2	2	18
Al-Cr-Mo-Re-Si	2	2	1	4	6	15
Al-Ir-Nb-Ta-Y	2	3	9	2	2	18
Al-Mo-Pd-Ti-V	4	5	2	2	2	15
Al-Cr-Mo-Re-Ta	2	2	1	5	6	16
Al-Ir-Nb-Ta-Zn	2	3	6	2	2	15
Al-Mo-Pd-Ti-W	2	5	3	2	2	14
Al-Au-Fe-Nb-Ta	1	8	1	2	2	14
Al-Pt-Sc-Ta-Ti	2	9	4	6	6	27
Al-Cr-Mo-Re-Ti	2	2	1	4	6	15
Al-Ir-Nb-Ta-Zr	5	3	6	2	2	18
Al-Pt-Sc-Ta-V	5	9	4	6	6	30
Al-Au-Fe-Nb-Ti	1	8	2	1	2	14
Al-Cr-Mo-Re-V	5	2	1	4	6	18
Al-Mo-Pd-Ti-Zn	2	5	1	2	2	12
Al-Au-Fe-Nb-V	1	8	2	1	2	14
Al-Cr-Mo-Re-W	2	2	2	4	6	16
Al-Mo-Pd-Ti-Zr	5	5	1	2	2	15
Al-Cr-Mo-Re-Zn	2	1	1	4	6	14
Al-Pt-Sc-Ta-Zn	2	9	2	6	6	25
Al-Cr-Mo-Re-Zr	5	2	1	4	6	18
Al-Au-Fe-Nb-Zn	1	8	1	1	2	13
Al-Pt-Sc-Ta-Zr	5	9	2	6	6	28
Al-Ir-Nb-Ti-V	3	3	9	1	1	17
Al-Ir-Nb-Ti-W	1	3	9	1	1	15
Al-Au-Fe-Ni-Pd	1	8	1	3	3	16
Al-Co-Mo-Nb-Ni	2	1	4	1	1	9
Al-Ir-Nb-Ti-Y	2	3	10	1	2	18
Al-Co-Mo-Nb-Os	5	3	8	8	8	32
Al-Ir-Nb-Ti-Zn	1	3	7	1	1	13
Al-Co-Mo-Nb-Pd	5	5	4	2	2	18
Al-Ir-Nb-Ti-Zr	3	3	7	1	1	15
Al-Co-Mo-Nb-Pt	2	8	6	3	2	21
Al-Pt-Sc-Ti-V	3	9	5	6	6	29
Al-Co-Mo-Nb-Re	5	2	4	5	6	22
Al-Ir-Nb-V-W	3	3	10	1	1	18
Al-Mo-Pt-Re-Rh	6	10	4	8	7	35
Al-Co-Mo-Nb-Ru	5	2	8	1	4	20
Al-Pt-Sc-Ti-Y	2	9	7	6	6	30
Al-Mo-Pt-Re-Ru	6	9	5	6	8	34
Al-Ir-Nb-V-Zn	3	3	7	1	1	15
Al-Au-Fe-Ni-Ta	1	8	1	2	2	14
Al-Pt-Sc-Ti-Zn	1	9	3	6	6	25
Al-Ir-Nb-V-Zr	6	3	7	1	1	18
Al-Mo-Pt-Re-Sc	6	9	3	7	8	33
Al-Pt-Sc-Ti-Zr	4	9	3	6	6	28
Al-Co-Mo-Nb-Ta	2	1	4	2	1	10
Al-Au-Fe-Ni-V	1	8	1	1	2	13
Al-Ir-Nb-W-Zr	4	3	8	1	1	17
Al-Mo-Pt-Re-Ta	3	9	2	6	7	27
Al-Cr-Mo-Ru-Ti	2	1	4	1	4	12
Al-Co-Mo-Nb-V	4	1	5	1	1	12
Al-Pt-Sc-V-Zn	4	9	4	6	6	29
Al-Cr-Mo-Ru-V	5	2	5	1	4	17
Al-Ir-Nb-Y-Zr	5	3	9	1	2	20
Al-Mo-Pt-Re-Ti	2	9	2	6	7	26
Al-Cr-Mo-Ru-W	2	2	6	1	4	15
Al-Ir-Nb-Zn-Zr	4	3	5	1	1	14
Al-Ir-Ni-Os-Pd	7	6	8	9	9	39
Al-Mo-Pt-Re-V	5	9	3	6	7	30
Al-Ir-Ni-Os-Pt	4	10	9	9	9	41
Al-Co-Mo-Ni-Os	5	3	5	8	8	29
Al-Ir-Ni-Os-Re	7	6	7	10	10	40
Al-Mo-Pt-Re-W	2	9	4	6	7	28
Al-Ge-Mo-Re-Ta	6	2	2	5	8	23
Al-Ga-Hf-Ir-Mo	9	3	7	4	2	25
Al-Ir-Ni-Os-Rh	7	8	9	10	9	43
Al-Co-Mo-Ni-Pt	2	8	3	3	2	18
Al-Ge-Mo-Re-Ti	5	2	2	4	8	21
Al-Mo-Pt-Re-Zn	2	9	1	5	7	24
Al-Ir-Ni-Os-Ru	7	6	10	9	10	42
Al-Pt-Sc-Y-Zr	5	9	5	6	6	31
Al-Co-Mo-Ni-Re	5	2	2	4	6	19
Al-Ga-Hf-Ir-Nb	7	3	9	4	2	25
Al-Ge-Mo-Re-V	9	2	3	5	8	27
Al-Mo-Pt-Re-Zr	6	9	1	6	7	29
Al-Ir-Ni-Os-Sc	7	6	9	10	10	42
Al-Co-Mo-Ni-Ru	5	1	5	1	4	16
Al-Mo-Pt-Rh-Ru	6	10	8	7	5	36
Al-Ir-Ni-Os-Ta	5	5	8	9	9	36
Al-Co-Mo-Ni-Ta	2	1	2	1	1	7
Al-Ir-Ni-Os-Ti	3	5	8	8	9	33
Al-Cr-Mo-Sc-W	2	1	4	6	5	18
Al-Ir-Ni-Os-V	6	5	9	9	9	38
Al-Ga-Hf-Ir-Re	10	4	7	6	6	33
Al-Mo-Pt-Rh-Ta	3	10	4	7	4	28
Al-Co-Mo-Ni-V	4	1	3	1	1	10
Al-Ir-Ni-Os-W	4	5	10	9	9	37
Al-Pt-Si-Ta-W	1	9	6	3	3	22
Al-Co-Mo-Ni-W	2	1	4	1	1	9
Al-Mo-Pt-Rh-Ti	2	10	5	7	4	28
Al-Cr-Mo-Si-V	2	1	2	1	1	7
Al-Ir-Ni-Os-Zr	7	5	7	8	9	36
Al-Cr-Mo-Si-W	1	1	3	1	1	7
Al-Mo-Pt-Rh-V	5	10	5	7	4	31
Ag-Bi-Hf-In-Ti	9	1	2	4	4	20
Al-Co-Mo-Os-Pd	9	6	5	9	9	38
Al-Mo-Pt-Rh-W	2	10	7	7	4	30
Al-Co-Mo-Os-Pt	5	9	7	9	9	39
Al-Co-Mo-Os-Re	9	4	5	10	10	38
Al-Ga-Hf-Ir-Ta	8	3	7	4	2	24
Al-Co-Mo-Os-Ru	9	4	9	8	9	39
Al-Co-Mo-Os-Sc	9	4	7	10	10	40
Al-Cr-Mo-Ta-Ti	1	1	1	1	1	5
Al-Ga-Hf-Ir-Ti	7	3	8	4	2	24
Al-Au-Fe-Pd-Pt	1	10	1	4	4	20
Al-Cr-Mo-Ta-V	2	1	1	2	1	7
Al-Pt-Si-Ti-W	1	8	6	3	2	20
Al-Mo-Pt-Ru-Ta	3	9	5	3	5	25
Al-Co-Mo-Os-Ta	6	4	5	9	8	32
Al-Ga-Hf-Ir-V	9	3	9	4	2	27
Al-Ir-Ni-Pd-Pt	4	10	6	4	4	28
Al-Cr-Mo-Ta-W	1	1	2	2	1	7
Al-Cr-Mo-Ta-Zn	1	1	1	1	1	5
Al-Mo-Pt-Ru-Ti	2	9	6	3	5	25
Al-Ir-Ni-Pd-Rh	7	8	7	7	4	33
Al-Co-Mo-Os-V	8	3	7	8	8	34
Ag-Hf-In-Sc-Zr	10	2	1	7	7	27
Al-Co-Mo-Os-W	5	3	8	8	8	32
Al-Cr-Mo-Ta-Zr	2	1	1	1	1	6
Al-Ir-Ni-Pd-Ru	7	6	8	3	5	29
Al-Co-Mo-Os-Zn	5	3	4	8	8	28
Al-Mo-Pt-Ru-V	5	9	7	3	5	29
Al-Mo-Pt-Ru-W	2	9	8	3	5	27
Al-Au-Fe-Pd-Ta	2	8	1	3	3	17
Al-Cr-Mo-Ti-V	2	1	2	1	1	7
Al-Cr-Mo-Ti-W	1	1	3	1	1	7
Al-Ir-Ni-Pd-W	3	6	7	2	3	21
Al-Cr-Mo-Ti-Zn	1	1	1	1	1	5
Al-Cr-Mo-V-W	2	1	3	1	1	8
Al-Ir-Ni-Pt-Re	4	10	5	6	7	32
Al-Ir-Ni-Pt-Rh	4	10	8	7	4	33
Al-Ir-Ni-Pt-Ru	4	10	9	3	5	31
Al-Cr-Mo-W-Zr	2	1	2	1	1	7
Al-Mo-Pt-Sc-Ti	2	9	3	6	6	26
Al-Ge-Mo-Ta-V	6	1	3	2	5	17
Al-Cr-Nb-Ni-Os	1	3	6	8	8	26
Al-Au-Fe-Pt-Ta	1	10	1	4	3	19
Al-Ge-Mo-Ta-W	3	1	5	2	5	16
Al-Ir-Ni-Pt-Ta	2	9	5	3	3	22
Al-Cr-Nb-Ni-Re	1	2	2	4	6	15
Ag-Hf-In-Ti-Zn	6	1	1	4	3	15
Ag-Hf-In-Ti-Zr	9	1	1	4	3	18
Al-Ir-Ni-Pt-V	3	9	7	3	3	25
Al-Mo-Pt-Si-Ti	1	8	3	3	2	17
Al-Ir-Ni-Pt-W	1	9	8	3	3	24
Al-Co-Mo-Pt-Re	5	9	3	6	7	30
Al-Co-Mo-Pt-Ru	5	9	7	3	5	29
Al-Cr-Nb-Ni-Ta	1	1	2	2	1	7
Al-Au-Fe-Re-Ti	1	8	1	5	6	21
Al-Cr-Nb-Ni-V	1	1	4	1	1	8
Al-Ir-Ni-Re-Rh	7	7	6	8	7	35
Al-Ge-Mo-V-W	5	1	6	1	5	18
Al-Cr-Nb-Ni-W	1	1	5	1	1	9
Al-Ir-Ni-Re-Ru	7	5	8	5	8	33
Al-Co-Mo-Pt-Ta	2	9	3	3	3	20
Al-Ir-Ni-Re-Sc	7	5	5	7	8	32
Al-Co-Mo-Pt-Ti	2	8	4	3	2	19
Al-Cr-Nb-Os-Pd	3	6	7	9	9	34
Al-Ir-Ni-Re-Ta	5	4	3	5	6	23
Al-Cr-Nb-Os-Pt	1	9	8	9	9	36
Al-Co-Mo-Pt-V	5	8	4	3	2	22
Al-Co-Mo-Pt-W	2	8	6	3	2	21
Al-Cr-Nb-Os-Re	3	4	6	10	10	33
Al-Mo-Pt-Ta-Ti	1	9	2	3	2	17
Al-Ir-Ni-Re-Ti	3	4	4	5	6	22
Al-Cr-Nb-Os-Rh	3	7	9	10	9	38
Al-Cr-Nb-Os-Ru	3	4	10	8	9	34
Al-Ir-Ni-Re-V	6	4	5	5	6	26
Al-Ga-Hf-Mo-Nb	5	1	6	4	1	17
Al-Mo-Pt-Ta-V	2	9	3	3	3	20
Al-Ir-Ni-Re-W	4	4	6	5	6	25
Al-Pt-Ta-Ti-V	1	9	4	3	2	19
Al-Mo-Pt-Ta-W	1	9	4	3	3	20
Al-Pt-Ta-Ti-W	1	9	5	3	3	21
Al-Co-Mo-Re-Ru	9	2	5	5	7	28
Al-Cr-Nb-Os-Ta	2	4	6	9	8	29
Al-Ir-Ni-Re-Zr	7	4	3	5	6	25
Al-Pt-Ta-Ti-Y	1	9	5	3	3	21
Al-Mo-Pt-Ta-Zn	1	9	1	3	2	16
Al-Cr-Nb-Os-Ti	1	3	7	8	8	27
Al-Ga-Hf-Mo-Re	9	2	3	6	6	26
Al-Ir-Ni-Rh-Ru	7	7	10	7	5	36
Al-Mo-Pt-Ta-Zr	3	9	1	3	3	19
Al-Pt-Ta-Ti-Zn	1	9	2	3	2	17
Al-Co-Mo-Re-Ta	6	2	2	5	6	21
Al-Cr-Nb-Os-V	3	3	8	8	8	30
Al-Cr-Nb-Os-W	1	3	9	8	8	29
Al-Pt-Ta-Ti-Zr	2	9	2	3	2	18
Al-Co-Mo-Re-Ti	5	2	2	4	6	19
Al-Cr-Nb-Os-Zn	1	3	6	8	8	26
Al-Co-Mo-Re-V	8	2	2	5	6	23
Al-Co-Mo-Re-W	5	2	4	4	6	21
Al-Pt-Ta-V-W	2	9	6	3	3	23
Al-Ga-Hf-Mo-Ti	5	1	4	4	1	15
Al-Mo-Pt-Ti-V	2	8	3	3	2	18
Al-Pt-Ta-V-Zn	2	9	2	3	2	18
Al-Pt-Ta-V-Zr	5	9	2	3	2	21
Al-Ir-Ni-Rh-W	4	7	9	6	4	30
Al-Mo-Pt-Ti-W	1	8	5	3	2	19
Al-Pt-Ta-W-Zn	1	9	4	3	3	20
Al-Ge-Nb-Os-Re	7	5	9	10	10	41
Al-Pt-Ta-W-Zr	2	9	4	3	3	21
Al-Mo-Pt-Ti-Zn	1	8	2	3	2	16
Al-Mo-Pt-Ti-Zr	2	8	2	3	2	17
Al-Pt-Ta-Y-Zr	2	9	4	3	3	21
Al-Pt-Ta-Zn-Zr	2	9	1	3	2	17
Al-Ir-Ni-Ru-Sc	7	5	9	6	7	34
Al-Mo-Pt-V-W	2	9	5	3	2	21
Al-Ga-Hf-Nb-Pd	7	5	6	5	2	25
Al-Ga-Hf-Nb-Pt	4	9	8	5	2	28
Al-Mo-Pt-V-Zn	2	8	2	3	2	17
Al-Ga-Hf-Nb-Re	7	2	6	6	6	27
Al-Ga-Hf-Nb-Rh	7	7	9	8	3	34
Al-Ir-Ni-Ru-Ti	3	4	8	1	5	21
Al-Co-Mo-Ru-V	8	2	7	1	4	22
Al-Ir-Ni-Ru-V	6	4	9	1	5	25
Al-Co-Mo-Ru-W	5	2	8	1	4	20
Al-Ir-Ni-Ru-W	4	4	10	1	5	24
Al-Ga-Hf-Nb-Ta	5	1	6	4	1	17
Al-Cr-Nb-Pt-Re	1	9	4	6	7	27
Al-Mo-Re-Rh-Ru	9	7	6	8	8	38
Al-Ir-Ni-Ru-Zr	7	4	7	1	5	24
Al-Ga-Hf-Nb-Ti	3	1	7	4	1	16
Al-Ga-Hf-Nb-V	6	1	8	4	1	20
Al-Mo-Re-Rh-Ta	6	7	2	8	7	30
Al-Pt-Ti-V-W	1	9	7	3	2	22
Al-Ga-Hf-Nb-Zr	7	1	6	4	1	19
Al-Mo-Re-Rh-Ti	5	7	3	8	7	30
Al-Cr-Nb-Pt-V	1	9	6	3	2	21
Al-Cr-Nb-Pt-W	1	9	7	3	2	22
Al-Pt-Ti-V-Zn	1	8	3	3	2	17
Al-Pt-Ti-V-Zr	3	9	3	3	2	20
Al-Mo-Re-Rh-Zr	9	7	2	8	7	33
Al-Au-Fe-Ta-Ti	1	8	1	2	2	14
Al-Au-Fe-Ta-V	1	8	1	2	2	14
Al-Mo-Re-Ru-Sc	9	3	5	7	8	32
Al-Cr-Nb-Re-Ru	3	3	6	5	7	24
Al-Mo-Re-Ru-Si	5	2	4	5	7	23
Al-Au-Fe-Ta-Zn	1	8	1	2	2	14
Al-Ir-Ni-Sc-Ta	5	4	5	6	6	26
Al-Mo-Re-Ru-Ta	6	3	3	5	8	25
Al-Pt-Ti-Y-Zr	2	9	5	3	2	21
Al-Cr-Nb-Re-Ta	2	2	2	5	6	17
Al-Mo-Re-Ru-Ti	5	2	4	5	7	23
Al-Ir-Ni-Sc-Ti	3	3	6	6	6	24
Al-Pt-Ti-Zn-Zr	1	8	2	3	2	16
Al-Mo-Re-Ru-V	9	3	5	5	7	29
Al-Cr-Nb-Re-Ti	1	2	3	4	6	16
Al-Mo-Re-Ru-W	6	2	6	5	8	27
Al-Cr-Nb-Re-V	3	2	4	5	6	20
Al-Au-Fe-Ti-V	1	8	1	1	2	13
Al-Mo-Re-Ru-Zn	6	2	3	5	7	23
Al-Cr-Nb-Re-W	1	2	5	5	6	19
Al-Mo-Re-Ru-Zr	9	2	3	5	7	26
Al-Cr-Nb-Re-Zn	1	2	2	4	6	15
Al-Au-Fe-Ti-Zn	1	8	1	1	2	13
Al-Co-Mo-Ta-V	5	1	3	2	1	12
Al-Cr-Nb-Rh-V	3	6	7	6	3	25
Ag-Mg-Pd-Pt-Rh	7	10	6	7	4	34
Al-Mo-Re-Sc-Ta	6	3	1	7	8	25
Al-Re-Rh-Ru-Ta	8	7	6	8	8	37
Al-Mo-Re-Sc-Ti	5	2	2	7	8	24
Al-Ge-Nb-Re-Ta	5	2	5	5	8	25
Al-Mo-Re-Sc-V	9	2	2	7	8	28
Al-Ga-Hf-Os-Re	10	5	7	10	10	42
Al-Ge-Nb-Re-Ti	3	2	6	4	8	23
Al-Re-Rh-Ru-Ti	7	7	7	8	8	37
Al-Mo-Re-Sc-W	6	2	4	7	8	27
Al-Re-Rh-Ru-W	8	7	9	8	8	40
Al-Mo-Re-Sc-Zr	9	2	1	7	8	27
Al-Cr-Nb-Ru-Ta	2	2	7	2	4	17
Al-Mo-Re-Si-Ta	2	2	1	5	6	16
Al-Cr-Nb-Ru-Ti	1	2	7	1	4	15
Al-Ga-Hf-Os-Ta	8	4	7	10	9	38
Al-Cr-Nb-Ru-V	3	2	8	1	4	18
Al-Mo-Re-Si-Ti	2	2	2	4	6	16
Al-Cr-Nb-Ru-W	1	2	9	1	4	17
Al-Mo-Re-Si-V	5	2	2	4	6	19
Al-Ir-Ni-Ta-Ti	2	3	4	2	2	13
Al-Mo-Re-Si-W	2	2	3	4	6	17
Al-Ir-Ni-Ta-V	4	3	5	2	2	16
Al-Co-Nb-Ni-Os	3	3	8	8	8	30
Al-Ir-Ni-Ta-W	2	3	6	2	2	15
Al-Ir-Ni-Ta-Zn	2	3	3	2	2	12
Al-Co-Nb-Ni-Pt	1	8	6	3	2	20
Ag-Au-Mg-Nb-Pd	3	8	3	3	3	20
Al-Co-Nb-Ni-Re	3	2	4	4	6	19
Al-Ir-Ni-Ta-Zr	5	3	3	2	2	15
Al-Mo-Re-Ta-Ti	2	2	1	5	6	16
Al-Re-Rh-Sc-Ti	7	7	5	8	8	35
Al-Cr-Nb-Sc-W	1	1	7	6	5	20
Al-Mo-Re-Ta-V	6	2	1	5	6	20
Al-Mo-Re-Ta-W	3	2	2	5	6	18
Al-Co-Nb-Ni-Ta	1	1	4	2	1	9
Al-Ir-Ni-Ti-V	3	3	6	1	1	14
Al-Mo-Re-Ta-Zn	3	2	1	5	6	17
Al-Ir-Ni-Ti-W	1	3	7	1	1	13
Al-Mo-Re-Ta-Zr	6	2	1	5	6	20
Al-Co-Nb-Ni-V	2	1	6	1	1	11
Al-Co-Nb-Ni-W	1	1	7	1	1	11
Al-Re-Rh-Sc-Zr	10	7	3	8	8	36
Al-Ir-Ni-Ti-Zr	3	3	4	1	1	12
Al-Ir-Ni-V-W	3	3	8	1	1	16
Al-Co-Nb-Os-Pd	6	6	8	9	9	38
Al-Mo-Re-Ti-V	5	2	2	4	6	19
Al-Co-Nb-Os-Pt	3	9	9	9	9	39
Al-Ga-Hf-Pd-Sc	10	6	5	7	6	34
Al-Co-Nb-Os-Re	7	4	8	10	10	39
Al-Mo-Re-Ti-W	2	2	3	4	6	17
Al-Cr-Nb-Ta-Ti	1	1	3	2	1	8
Al-Co-Nb-Os-Rh	7	7	10	10	9	43
Al-Ir-Ni-V-Zr	6	3	4	1	1	15
Al-Co-Nb-Os-Ru	7	4	10	8	9	38
Al-Cr-Nb-Ta-V	1	1	4	2	1	9
Al-Mo-Re-Ti-Zn	2	2	1	4	6	15
Al-Ga-Hf-Pd-Ta	8	5	3	5	2	23
Al-Co-Nb-Os-Sc	7	4	9	10	10	40
Al-Cr-Nb-Ta-W	1	1	5	2	1	10
Al-Mo-Re-Ti-Zr	5	2	1	4	6	18
Al-Ir-Ni-W-Zr	4	3	6	1	1	15
Al-Co-Nb-Os-Ta	4	4	8	9	8	33
Al-Au-Ga-Hf-Ti	4	8	3	4	2	21
Al-Mo-Re-V-W	5	2	3	5	6	21
Al-Ga-Hf-Pd-Ti	7	5	4	5	2	23
Al-Co-Nb-Os-V	6	3	9	8	8	34
Al-Ga-Hf-Pd-V	9	5	5	5	2	26
Al-Co-Nb-Os-W	3	3	10	8	8	32
Al-Mo-Re-V-Zr	9	2	1	4	6	22
Al-Cr-Nb-Ti-V	1	1	5	1	1	9
Al-Co-Nb-Os-Zr	7	3	8	8	8	34
Al-Cr-Nb-Ti-W	1	1	6	1	1	10
Al-Mo-Re-W-Zr	6	2	2	4	6	20
Al-Re-Rh-Ta-Ti	5	7	3	8	7	30
Al-Cr-Nb-Ti-Zn	1	1	3	1	1	7
Al-Mo-Re-Zn-Zr	6	2	1	4	6	19
Al-Ga-Hf-Pd-Zr	10	5	3	5	2	25
Al-Re-Rh-Ta-V	8	7	4	8	7	34
Al-Cr-Nb-V-W	1	1	7	1	1	11
Al-Re-Rh-Ta-W	5	7	5	8	7	32
Al-Ge-Nb-Ta-V	4	1	6	2	5	18
Al-Ge-Nb-Ta-W	2	1	8	2	5	18
Al-Re-Rh-Ta-Zr	8	7	2	8	7	32
Al-Mo-Rh-Ru-Ta	6	7	6	7	5	31
Al-Cr-Nb-W-Zr	1	1	5	1	1	9
Al-Ir-Os-Pd-Pt	8	10	9	9	9	45
Ag-As-Cu-Pd-Te	9	5	1	4	3	22
Al-Ir-Os-Pd-Rh	10	8	10	10	9	47
Al-Co-Nb-Pd-Re	6	6	4	5	7	28
Al-Ir-Os-Pd-Ru	10	6	10	9	10	45
Al-Mo-Rh-Ru-V	9	7	8	6	5	35
Al-Cr-Ni-Os-Pt	1	9	5	9	9	33
Al-Ga-Hf-Pt-Ta	5	9	5	5	3	27
Al-Mo-Rh-Ru-W	6	7	9	6	5	33
Al-Cr-Ni-Os-Re	3	4	3	10	10	30
Ag-As-Cu-Pd-Zn	6	5	1	2	2	16
Al-Ga-Hf-Pt-Ti	4	9	6	5	2	26
Al-Re-Rh-Ti-V	6	7	4	8	7	32
Al-Cr-Ni-Os-Ru	3	4	8	8	9	32
Al-Ir-Os-Pd-Ta	8	6	8	9	9	40
Ag-Cd-Ga-In-Mg	9	1	6	2	4	22
Al-Re-Rh-Ti-W	3	7	6	8	7	31
Al-Ga-Hf-Pt-V	7	9	7	5	2	30
Al-Co-Nb-Pd-Ta	4	5	4	3	2	18
Al-Ir-Os-Pd-Ti	7	6	8	9	9	39
Al-Ir-Os-Pd-V	9	6	9	9	9	42
Al-Ir-Os-Pd-W	7	6	10	9	9	41
Al-Cr-Ni-Os-Ta	2	4	3	9	8	26
Al-Co-Nb-Pd-V	6	5	6	2	2	21
Al-Re-Rh-Ti-Zr	7	7	2	8	7	31
Al-Ir-Os-Pd-Zr	10	6	7	9	9	41
Al-Cr-Ni-Os-V	3	3	5	8	8	27
Al-Cr-Ni-Os-W	1	3	6	8	8	26
Al-Ir-Os-Pt-Rh	8	10	10	10	9	47
Al-Co-Nb-Pt-Re	3	9	6	6	7	31
Al-Cr-Ni-Os-Zn	1	3	3	8	8	23
Al-Ir-Os-Pt-Ru	8	10	10	9	10	47
Al-Re-Rh-V-Zr	9	7	3	8	7	34
Al-Mo-Rh-Sc-Ta	6	7	4	8	7	32
Al-Ga-Hf-Re-Ta	8	2	3	6	6	25
Al-Re-Rh-W-Zr	8	7	4	8	7	34
Ag-Cd-Ga-In-Sn	9	1	3	2	4	19
Al-Mo-Rh-Sc-Ti	5	7	4	8	7	31
Al-Ga-Hf-Re-Ti	7	2	4	6	6	25
Al-Ir-Os-Pt-Ta	5	10	9	9	9	42
Al-Ge-Ni-Os-V	6	4	7	8	10	35
Al-Co-Nb-Pt-Ta	2	9	6	3	3	23
Al-Ga-Hf-Re-W	8	2	6	6	6	28
Al-Ir-Os-Pt-Ti	4	10	9	9	9	41
Al-Ir-Os-Pt-V	7	10	10	9	9	45
Al-Ir-Os-Pt-W	4	10	10	9	9	42
Al-Co-Nb-Pt-V	3	9	8	3	2	25
Al-Mo-Rh-Sc-Zr	9	7	3	8	7	34
Al-Co-Nb-Pt-W	1	9	9	3	2	24
Al-Cr-Ni-Pd-Pt	1	10	2	4	3	20
Ag-Cd-Ga-In-Zn	9	1	3	2	4	19
Al-Ir-Os-Pt-Zr	8	10	9	9	9	45
Al-Ga-Hf-Rh-Sc	10	7	8	8	7	40
Al-Ir-Os-Re-Ru	10	6	10	10	10	46
Al-Co-Nb-Re-Rh	7	7	7	8	7	36
Ag-As-Cu-Sb-Te	9	1	1	2	2	15
Al-Co-Nb-Re-Ru	7	3	8	5	7	30
Al-Ir-Os-Re-Sc	10	6	9	10	10	45
Al-Ir-Os-Re-Si	7	6	9	10	10	42
Al-Ga-Hf-Rh-Ta	8	7	6	8	4	33
Al-Re-Ru-Sc-Ta	8	3	5	7	8	31
Al-Co-Nb-Re-Sc	7	2	6	7	8	30
Al-Ir-Os-Re-Ta	8	6	7	10	10	41
Al-Ga-Hf-Rh-Ti	7	6	7	8	3	31
Al-Re-Ru-Sc-Ti	7	3	6	7	8	31
Al-Co-Nb-Re-Ta	4	2	4	5	6	21
Al-Ir-Os-Re-Ti	7	6	8	10	10	41
Al-Ga-Hf-Rh-V	9	7	8	8	3	35
Al-Re-Ru-Sc-V	9	3	7	7	8	34
Al-Ir-Os-Re-V	9	6	9	10	10	44
Al-Re-Ru-Sc-W	8	3	8	7	8	34
Al-Co-Nb-Re-Ti	3	2	5	4	6	20
Al-Ir-Os-Re-W	8	6	10	10	10	44
Al-Co-Nb-Re-V	6	2	6	5	6	25
Ag-Mg-Pd-Sc-Zr	9	6	3	6	6	30
Al-Co-Nb-Re-W	3	2	7	5	6	23
Al-Ir-Os-Re-Zn	8	6	7	10	10	41
Al-Re-Ru-Sc-Zr	10	3	4	7	8	32
Al-Cr-Ni-Pt-Re	1	9	2	5	7	24
Al-Ga-Hf-Rh-Zr	10	7	5	8	3	33
Al-Ir-Os-Re-Zr	10	6	7	10	10	43
Al-Re-Ru-Si-Ta	5	3	5	5	8	26
Al-Co-Nb-Re-Zr	7	2	3	4	6	22
Al-Ir-Os-Rh-Ru	10	8	10	10	10	48
Al-Cu-Pd-Ta-Ti	2	5	1	3	2	13
Al-Mo-Rh-Ta-Ti	2	7	3	7	3	22
Al-Cr-Ni-Pt-Ru	1	9	5	3	5	23
Al-Cu-Pd-Ta-V	4	5	1	3	2	15
Al-Re-Ru-Si-V	6	3	6	5	7	27
Al-Mo-Rh-Ta-V	6	7	3	7	3	26
Al-Re-Ru-Si-W	3	2	8	5	7	25
Al-Cu-Pd-Ta-Zn	2	5	1	3	2	13
Al-Co-Nb-Rh-Ta	4	7	7	7	3	28
Al-Ir-Os-Rh-Ta	8	8	10	10	9	45
Al-Co-Nb-Rh-V	6	6	8	6	3	29
Al-Ir-Os-Rh-Ti	7	8	10	10	9	44
Al-Mo-Rh-Ta-Zr	6	7	2	7	3	25
Al-Ir-Os-Rh-V	9	8	10	10	9	46
Al-Ir-Os-Rh-W	8	8	10	10	9	45
Al-Re-Ru-Ta-Ti	5	3	4	5	8	25
Al-Cr-Ni-Pt-V	1	8	3	3	2	17
Al-Cr-Ni-Pt-W	1	8	4	3	2	18
Al-Re-Ru-Ta-V	8	3	5	5	8	29
Al-Ir-Os-Rh-Zr	10	8	9	10	9	46
Al-Re-Ru-Ta-W	5	3	6	5	8	27
Al-Mo-Rh-Ti-V	5	6	4	6	3	24
Al-Co-Nb-Ru-Ta	4	2	8	2	4	20
Al-Ir-Os-Ru-Sc	10	6	10	10	10	46
Al-Mo-Rh-Ti-W	2	6	6	6	3	23
Al-Re-Ru-Ta-Zr	8	3	3	5	8	27
Al-Ir-Os-Ru-Si	7	6	10	9	10	42
Al-Co-Nb-Ru-V	6	2	9	1	4	22
Al-Cr-Ni-Re-Ru	3	2	3	5	7	20
Al-Mo-Rh-Ti-Zn	2	6	2	6	3	19
Al-Ir-Os-Ru-Ta	8	6	10	9	10	43
Ag-Cd-Ga-Mg-Sn	6	1	5	2	2	16
Al-Mo-Rh-Ti-Zr	5	6	2	6	3	22
Al-Ir-Os-Ru-Ti	7	6	10	9	10	42
Al-Cu-Pd-Ti-Zn	1	5	1	2	2	11
Al-Cr-Ni-Re-Ta	2	2	1	5	6	16
Al-Re-Ru-Ti-V	6	3	6	5	7	27
Al-Ir-Os-Ru-V	9	6	10	9	10	44
Al-Re-Ru-Ti-W	3	2	7	5	8	25
Al-Cr-Ni-Re-Ti	1	2	1	4	6	14
Al-Ir-Os-Ru-W	8	6	10	9	10	43
Al-Mo-Rh-V-Zr	9	6	3	6	3	27
Al-Re-Ru-Ti-Zn	4	2	4	5	7	22
Al-Cr-Ni-Re-V	3	2	1	4	6	16
Al-Ir-Os-Ru-Zn	8	6	10	9	10	43
Al-Cr-Ni-Re-W	1	2	2	4	6	15
Ag-Cd-Ga-Mg-Zn	7	1	5	2	2	17
Al-Re-Ru-Ti-Zr	7	2	4	5	7	25
Al-Mo-Rh-W-Zr	6	6	4	6	3	25
Al-Ir-Os-Ru-Zr	10	6	10	9	10	45
Al-Re-Ru-V-W	7	3	8	5	8	31
Al-Co-Nb-Sc-Ta	4	2	6	6	5	23
Al-Re-Ru-V-Zn	7	3	4	5	7	26
Al-Co-Nb-Sc-Ti	3	1	7	6	5	22
Al-Re-Ru-V-Zr	9	3	4	5	7	28
Al-Co-Nb-Sc-V	6	1	7	6	5	25
Al-Re-Ru-W-Zn	4	2	6	5	8	25
Al-Re-Ru-W-Zr	8	3	6	5	8	30
Al-Co-Nb-Sc-Zr	7	1	5	6	5	24
Al-Ge-Ni-Re-V	6	2	3	4	8	23
Al-Ir-Os-Sc-Ta	8	6	9	10	10	43
Al-Au-Ga-Mo-Nb	2	8	5	2	2	19
Al-Mo-Ru-Sc-Ta	6	3	5	6	7	27
Al-Ir-Os-Sc-V	9	6	10	10	10	45
Al-Ir-Os-Sc-W	8	6	10	10	10	44
Al-Mo-Ru-Sc-Ti	5	2	6	6	7	26
Al-Ir-Os-Sc-Zr	10	6	8	10	10	44
Ag-Au-Bi-Nb-Pd	6	8	3	3	3	23
Al-Au-Ga-Mo-Ta	3	8	3	2	2	18
Al-Ir-Os-Si-Ta	5	5	9	9	9	37
Al-Mo-Ru-Sc-Zr	9	2	4	6	7	28
Al-Ga-Hf-Ta-Ti	5	1	4	4	1	15
Al-Cr-Ni-Ru-V	3	2	5	1	4	15
Al-Cr-Ni-Ru-W	1	2	6	1	4	14
Al-Co-Nb-Ta-Ti	1	1	5	2	1	10
Al-Ir-Os-Si-V	6	5	10	9	9	39
Al-Ir-Os-Si-W	3	5	10	9	9	36
Al-Co-Nb-Ta-V	3	1	6	2	1	13
Al-Ga-Hf-Ta-Zr	8	1	3	4	1	17
Al-Co-Nb-Ta-W	1	1	7	2	1	12
Al-Mo-Ru-Si-V	5	2	6	1	4	18
Al-Co-Nb-Ta-Zr	4	1	3	2	1	11
Al-Au-Ga-Nb-Pd	4	8	6	4	3	25
Al-Au-Ga-Nb-Pt	2	10	8	4	3	27
Al-Ga-Hf-Ti-V	6	1	6	4	1	18
Al-Ir-Os-Ta-Ti	5	5	8	9	9	36
Al-Co-Nb-Ti-V	2	1	7	1	1	12
Al-Ir-Os-Ta-V	8	6	9	9	9	41
Al-Ir-Os-Ta-W	5	5	10	9	9	38
Al-Ga-Hf-Ti-Zr	7	1	3	4	1	16
Al-Au-Ga-Nb-Ta	2	8	6	2	2	20
Al-Co-Nb-Ti-Zr	3	1	4	1	1	10
Al-Co-Nb-V-W	2	1	8	1	1	13
Al-Au-Ga-Nb-Ti	1	8	7	2	2	20
Al-Ir-Os-Ta-Zr	8	5	7	9	9	38
Al-Au-Ga-Nb-V	3	8	7	2	2	22
Al-Co-Nb-V-Zr	6	1	5	1	1	14
Al-Mo-Ru-Ta-Ti	2	2	4	2	4	14
Al-Mo-Ru-Ta-V	6	2	5	2	4	19
Al-Ir-Os-Ti-V	6	5	9	9	9	38
Al-Co-Ni-Os-Pd	6	6	6	9	9	36
Al-Ir-Os-Ti-W	3	5	10	9	9	36
Ag-Au-Bi-Pb-Sb	6	8	1	1	2	18
Al-Co-Ni-Os-Pt	3	9	7	9	9	37
Al-Mo-Ru-Ta-W	3	2	6	2	4	17
Al-Co-Ni-Os-Re	7	4	5	10	10	36
Al-Cd-Pd-Sc-Zr	10	6	1	6	7	30
Al-Co-Ni-Os-Ru	7	4	9	8	9	37
Al-Ir-Os-Ti-Zr	7	5	8	8	9	37
Al-Ir-Os-V-W	7	5	10	9	9	40
Al-Mo-Ru-Ta-Zr	6	2	3	2	4	17
Al-Ir-Os-V-Zn	7	5	8	9	9	38
Al-Co-Ni-Os-Ta	4	4	5	9	8	30
Al-Ir-Os-V-Zr	9	5	8	9	9	40
Al-Re-Sc-Ta-Ti	5	3	2	7	8	25
Al-Re-Sc-Ta-V	8	3	3	7	8	29
Al-Ir-Os-W-Zn	4	5	9	9	9	36
As-Au-Hg-Pb-Sb	3	8	2	2	2	17
Al-Re-Sc-Ta-W	5	3	4	7	8	27
Al-Co-Ni-Os-V	6	3	7	8	8	32
Al-Ir-Os-W-Zr	8	5	9	9	9	40
Al-Co-Ni-Os-W	3	3	8	8	8	30
Al-Re-Sc-Ta-Zr	8	3	1	7	8	27
Al-Co-Ni-Os-Zn	3	3	5	8	8	27
Al-Cr-Ni-Ta-V	1	1	2	2	1	7
Al-Mo-Ru-Ti-V	5	2	6	1	4	18
Al-Cr-Ni-Ta-W	1	1	2	1	1	6
Al-Mo-Ru-Ti-W	2	2	7	1	4	16
As-Au-Hg-Pd-Sb	7	8	3	3	3	24
Al-Re-Sc-Ti-V	6	2	3	7	8	26
Al-Mo-Ru-Ti-Zr	5	2	3	1	4	15
Al-Re-Sc-Ti-W	3	2	5	7	8	25
Al-Mo-Ru-V-W	5	2	8	1	4	20
Al-Re-Sc-Ti-Zr	7	2	2	7	8	26
Ag-Au-Mg-Sc-Zr	7	8	2	6	6	29
Al-Re-Sc-V-W	7	2	5	7	8	29
Al-Mo-Ru-V-Zn	5	2	4	1	4	16
Al-Cr-Ni-Ti-V	1	1	2	1	1	6
Al-Cr-Ni-Ti-W	1	1	3	1	1	7
Al-Mo-Ru-V-Zr	9	2	4	1	4	20
Al-Re-Sc-V-Zr	9	2	2	7	8	28
Al-Re-Sc-W-Zr	8	2	3	7	8	28
Al-Mo-Ru-W-Zr	6	2	6	1	4	19
Al-Re-Si-Ta-Ti	1	2	2	5	6	16
Ag-Hf-Mg-Pd-Sc	9	6	3	7	6	31
Al-Re-Si-Ta-V	4	2	2	5	6	19
Al-Re-Si-Ta-W	2	2	4	5	6	19
Al-Co-Ni-Pt-Re	3	9	3	6	7	28
Al-Co-Ni-Pt-Ru	3	9	7	3	5	27
Al-Au-Ga-Pd-Ta	5	8	3	4	3	23
Al-Re-Si-Ti-V	3	2	3	4	6	18
Al-Re-Si-Ti-W	1	2	4	4	6	17
Al-Au-Ga-Pd-Ti	4	8	4	4	3	23
Ag-Hf-Mg-Pd-Zn	6	5	1	5	2	19
Al-Co-Ni-Pt-Ta	2	9	3	3	3	20
Al-Re-Si-V-W	3	2	5	5	6	21
Al-Co-Ni-Pt-V	3	8	5	3	2	21
Al-Co-Ni-Pt-W	1	8	6	3	2	20
Al-Cr-Os-Pt-Re	4	10	5	10	10	39
Al-Cr-Os-Pt-Rh	4	10	8	10	9	41
Al-Au-Ga-Pt-Ta	2	10	5	4	3	24
Al-Cr-Os-Pt-Ru	4	10	9	9	10	42
Al-Co-Ni-Re-Ru	7	2	5	5	7	26
Al-Cr-Os-Pt-Ta	2	10	5	9	9	35
Al-Co-Ni-Re-Ta	4	2	2	5	6	19
Al-Cr-Os-Pt-V	3	9	7	9	9	37
Al-Co-Ni-Re-Ti	3	2	2	4	6	17
Al-Cr-Os-Pt-W	1	9	8	9	9	36
Al-Co-Ni-Re-V	6	2	3	4	6	21
Al-Co-Ni-Re-W	3	2	4	4	6	19
Al-Cr-Os-Re-Ru	7	5	7	10	10	39
Al-Cr-Os-Re-Sc	7	5	5	10	10	37
Al-Cr-Os-Re-Si	3	4	5	10	10	32
Al-Cr-Os-Re-Ta	5	5	3	10	10	33
Al-Re-Ta-Ti-V	4	2	2	5	6	19
Al-Cr-Os-Re-Ti	3	4	4	10	10	31
Al-Re-Ta-Ti-W	2	2	3	5	6	18
Al-Cr-Os-Re-V	6	4	5	10	10	35
Al-Re-Ta-Ti-Zn	2	2	1	5	6	16
Al-Cr-Os-Re-W	4	4	6	10	10	34
Al-Re-Ta-Ti-Zr	5	2	1	5	6	19
Al-Cr-Os-Re-Zn	4	4	3	10	10	31
Al-Re-Ta-V-W	4	2	4	5	6	21
Al-Cr-Os-Re-Zr	7	4	3	10	10	34
Al-Ge-Os-Re-Ta	8	5	6	10	10	39
Al-Re-Ta-V-Zn	4	2	1	5	6	18
Al-Ge-Os-Re-Ti	7	5	7	10	10	39
Al-Re-Ta-V-Zr	8	2	1	5	6	22
Al-Cr-Os-Rh-Ta	5	7	6	10	9	37
Al-Re-Ta-W-Zr	5	2	2	5	6	20
Al-Mo-Sc-Ta-Ti	2	2	2	6	5	17
Al-Mo-Sc-Ta-V	6	2	2	6	5	21
Al-Co-Ni-Ru-V	6	2	7	1	4	20
Al-Mo-Sc-Ta-W	3	2	4	6	5	20
As-Au-In-Mg-Pd	8	8	3	4	4	27
Al-Co-Ni-Ru-W	3	2	8	1	4	18
Al-Mo-Sc-Ta-Zr	6	2	1	6	5	20
Al-Ir-Pd-Pt-Rh	8	10	8	7	4	37
Al-Cr-Os-Ru-Si	3	4	9	8	9	33
Al-Ir-Pd-Pt-Ru	8	10	9	4	5	36
Al-Cr-Os-Ru-Ti	3	4	8	8	9	32
Al-Cr-Os-Ru-V	6	4	9	8	9	36
Al-Cr-Os-Ru-W	4	4	10	8	9	35
Al-Mo-Sc-Ti-V	5	1	3	6	5	20
Al-Ge-Os-Ru-V	9	5	10	8	10	42
Al-Re-Ti-V-W	3	2	5	5	6	21
Al-Cr-Os-Ru-Zn	4	4	7	8	9	32
Al-Mo-Sc-Ti-W	2	1	4	6	5	18
Al-Re-Ti-V-Zn	3	2	2	4	6	17
Al-Ir-Pd-Pt-Te	8	10	6	4	4	32
Al-Re-Ti-V-Zr	6	2	2	4	6	20
Al-Mo-Sc-Ti-Zr	5	1	2	6	5	19
Al-Re-Ti-W-Zn	1	2	3	4	6	16
Ag-Cd-Ga-Sn-Zn	6	1	2	2	2	13
Al-Re-Ti-W-Zr	3	2	3	4	6	18
Al-Ir-Pd-Pt-V	7	10	7	4	4	32
Al-Mo-Sc-V-Zr	9	1	2	6	5	23
Al-Ir-Pd-Pt-W	4	10	8	4	4	30
Ag-Hf-Mg-Sc-Zr	9	2	2	7	5	25
Al-Mo-Sc-W-Zr	6	1	3	6	5	21
Al-Re-V-W-Zr	7	2	3	5	6	23
Al-Cr-Os-Si-V	3	3	6	8	8	28
Al-Cr-Os-Si-W	1	3	8	8	8	28
Al-Mo-Si-Ta-Ti	1	1	2	1	1	6
Al-Ir-Pd-Re-Ta	8	6	4	6	7	31
Al-Mo-Si-Ta-V	2	1	2	2	1	8
Al-Mo-Si-Ta-W	1	1	3	2	1	8
Al-Ir-Pd-Re-Ti	7	6	4	5	7	29
Al-Au-Ga-Ta-Ti	2	8	4	2	2	18
Al-Cr-Os-Ta-Ti	2	4	4	9	8	27
Al-Ge-Os-Ta-V	8	4	8	9	10	39
Al-Au-Ga-Ta-V	4	8	4	2	2	20
Al-Cr-Os-Ta-V	4	4	5	9	8	30
Al-Ir-Pd-Re-Zr	10	6	3	5	7	31
Al-Ir-Pd-Rh-Ru	10	8	10	7	5	40
Al-Cr-Os-Ta-W	2	4	6	9	8	29
Al-Cr-Os-Ta-Zn	2	4	3	9	8	26
Al-Mo-Si-Ti-V	1	1	3	1	1	7
Al-Cr-Os-Ta-Zr	5	4	3	9	8	29
Al-Mo-Si-Ti-W	1	1	4	1	1	8
Al-Mo-Si-V-W	2	1	5	1	1	10
Al-Cr-Os-Ti-V	3	3	6	8	8	28
Al-Au-Ga-Ti-V	3	8	5	2	2	20
Al-Cr-Os-Ti-W	1	3	7	8	8	27
Al-Co-Ni-Ta-V	3	1	3	2	1	10
Al-Co-Ni-Ta-W	1	1	4	2	1	9
Al-Cr-Os-V-W	3	3	8	8	8	30
Al-Cr-Os-V-Zr	6	3	4	8	8	29
Al-Cr-Os-W-Zn	1	3	6	8	8	26
Al-Cr-Os-W-Zr	4	3	6	8	8	29
Ag-Cu-Hf-Ti-Zn	3	1	1	4	1	10
Ag-Au-Cd-Cu-Pd	7	8	1	3	3	22
Al-Ir-Pd-Ru-Ti	7	6	9	3	5	30
Ag-Cu-Hf-Ti-Zr	6	1	1	4	1	13
Ag-Au-Cd-Cu-Pt	4	10	1	3	3	21
Al-Ir-Pd-Ru-V	9	6	9	3	5	32
Ag-Cu-Hf-Zn-Zr	7	1	1	4	1	14
Al-Co-Ni-V-W	2	1	6	1	1	11
As-Au-In-Pb-Pd	8	8	1	4	4	25
Al-Rh-Ru-Ta-Ti	5	7	7	7	5	31
Al-Rh-Ru-Ta-V	8	7	8	7	5	35
Ag-Au-Cd-Cu-Zn	3	8	1	1	2	15
Al-Ir-Pd-Sc-Ta	8	6	5	6	7	32
Al-Mo-Ta-Ti-V	2	1	2	2	1	8
Al-Mo-Ta-Ti-W	1	1	3	2	1	8
As-Au-In-Pd-Sb	10	8	1	4	4	27
Al-Ir-Pd-Sc-Ti	7	6	6	6	7	32
Al-Mo-Ta-Ti-Zn	1	1	1	1	1	5
Al-Mo-Ta-Ti-Zr	2	1	1	1	1	6
Al-Co-Os-Pd-Ru	9	6	9	9	10	43
Al-Mo-Ta-V-W	2	1	4	2	1	10
As-Au-In-Pd-Te	10	8	1	4	4	27
Al-Ir-Pd-Sc-Zr	10	6	5	6	7	34
Al-Mo-Ta-V-Zn	2	1	1	2	1	7
Al-Mo-Ta-V-Zr	6	1	1	2	1	11
Al-Mo-Ta-W-Zr	3	1	2	2	1	9
Al-Co-Os-Pt-Rh	7	10	9	10	9	45
Al-Co-Os-Pt-Ru	7	10	10	9	10	46
Ag-Cd-Ge-Mg-Pd	9	6	4	2	6	27
Al-Co-Os-Pt-Ta	5	10	7	9	9	40
Al-Co-Os-Pt-Ti	3	9	8	9	9	38
Al-Co-Os-Pt-V	6	9	9	9	9	42
Al-Co-Os-Pt-W	3	9	9	9	9	39
Al-Co-Os-Re-Ru	10	5	9	10	10	44
Al-Ir-Pd-Ta-Ti	5	6	5	3	3	22
Al-Co-Os-Re-Sc	10	5	7	10	10	42
Al-Ir-Pd-Ta-V	8	6	5	3	3	25
Al-Co-Os-Re-Si	6	4	7	10	10	37
Al-Ir-Pd-Ta-W	5	6	7	3	3	24
Al-Co-Os-Re-Ta	8	5	5	10	10	38
Al-Co-Os-Re-Ti	6	4	6	10	10	36
Al-Mo-Ti-V-W	2	1	4	1	1	9
Al-Co-Os-Re-V	9	4	7	10	10	40
Al-Co-Os-Re-W	7	4	8	10	10	39
Al-Ir-Pd-Ta-Zr	8	6	3	3	3	23
Al-Mo-Ti-V-Zn	2	1	2	1	1	7
Al-Co-Os-Re-Zr	10	4	4	10	10	38
Al-Mo-Ti-V-Zr	5	1	2	1	1	10
Al-Co-Os-Rh-Ru	10	8	10	10	10	48
Al-Mo-Ti-W-Zn	1	1	2	1	1	6
Al-Co-Os-Rh-Ta	8	7	8	10	9	42
Al-Ge-Pd-Pt-Ta	5	10	4	4	7	30
Al-Mo-Ti-W-Zr	2	1	2	1	1	7
Al-Ir-Pd-Ti-V	6	6	6	2	3	23
Al-Ir-Pd-Ti-W	3	6	8	2	3	22
Al-Co-Os-Ru-Sc	10	5	10	10	10	45
Al-Mo-V-W-Zr	5	1	3	1	1	11
Al-Co-Os-Ru-Si	6	4	10	8	9	37
Al-Cr-Pd-Pt-Rh	4	10	4	7	4	29
Al-Co-Os-Ru-Ta	8	5	9	9	10	41
Ag-In-Nb-Pd-Zn	6	5	2	3	4	20
Al-Cr-Pd-Pt-Ru	4	10	6	4	5	29
Al-Co-Os-Ru-Ti	6	4	10	8	9	37
Al-Ir-Pd-Ti-Zr	7	6	4	2	3	22
Al-Co-Os-Ru-V	9	4	10	8	9	40
Al-Co-Os-Ru-W	7	4	10	8	9	38
Al-Co-Os-Ru-Zn	7	4	9	8	9	37
Al-Nb-Ni-Os-Pd	3	6	7	9	9	34
Al-Co-Os-Ru-Zr	10	4	9	8	9	40
Al-Nb-Ni-Os-Pt	1	9	8	9	9	36
Al-Nb-Ni-Os-Re	3	4	6	10	10	33
Al-Nb-Ni-Os-Rh	3	7	9	10	9	38
Al-Nb-Ni-Os-Ru	3	4	10	8	9	34
Al-Nb-Ni-Os-Sc	3	4	8	10	10	35
Al-Cr-Pd-Pt-V	3	10	3	4	3	23
Al-Cr-Pd-Pt-W	1	10	4	4	3	22
Al-Ir-Pt-Re-Rh	8	10	8	8	7	41
Al-Nb-Ni-Os-Ta	2	4	6	9	8	29
Al-Ir-Pt-Re-Ru	8	10	9	6	8	41
Al-Nb-Ni-Os-Ti	1	3	7	8	8	27
Al-Nb-Ni-Os-V	3	3	8	8	8	30
Al-Nb-Ni-Os-W	1	3	9	8	8	29
Al-Ir-Pt-Re-Ta	5	10	5	6	7	33
Al-Nb-Ni-Os-Zn	1	3	6	8	8	26
Al-Nb-Ni-Os-Zr	3	3	6	8	8	28
Al-Ir-Pt-Re-Ti	4	10	6	6	7	33
Al-Ir-Pt-Re-V	7	10	7	6	7	37
Al-Ir-Pt-Re-W	4	10	8	6	7	35
Al-Ir-Pt-Re-Zr	8	10	5	6	7	36
Al-Co-Os-Ta-V	7	4	7	9	8	35
Al-Ir-Pt-Rh-Ru	8	10	10	7	5	40
Al-Co-Os-Ta-W	4	4	8	9	8	33
Al-Co-Os-Ta-Zr	8	4	5	9	8	34
Al-Nb-Ni-Pd-Re	3	6	3	5	7	24
Al-Ir-Pt-Rh-V	7	10	9	7	4	37
Al-Co-Os-V-W	6	3	9	8	8	34
Al-Ir-Pt-Rh-W	4	10	10	7	4	35
Al-Nb-Ni-Pd-Sc	3	6	4	6	6	25
Al-Nb-Ni-Pd-Ta	1	5	3	3	2	14
Al-Nb-Ni-Pd-Ti	1	5	3	2	2	13
Al-Nb-Ni-Pd-V	3	5	4	2	2	16
Al-Nb-Ni-Pd-W	1	5	6	2	2	16
Al-Ir-Pt-Ru-Ta	5	10	9	4	5	33
Al-Ir-Pt-Ru-Ti	4	10	10	3	5	32
Al-Nb-Ni-Pd-Zn	1	5	2	2	2	12
Ag-Au-Cd-Hf-Zr	10	8	1	4	2	25
Al-Rh-Sc-Ta-Ti	5	7	5	8	7	32
Al-Ir-Pt-Ru-V	7	10	10	3	5	35
Al-Nb-Ni-Pd-Zr	3	5	2	2	2	14
Al-Rh-Sc-Ta-V	8	7	5	8	7	35
Al-Ir-Pt-Ru-W	4	10	10	3	5	32
Al-Nb-Ni-Pt-Re	1	9	4	6	7	27
Al-Rh-Sc-Ta-Zr	8	7	3	8	7	33
Al-Rh-Sc-Ti-V	6	7	6	8	7	34
Al-Nb-Ni-Pt-Ta	1	9	4	3	2	19
Al-Rh-Sc-Ti-Y	5	7	8	8	7	35
Al-Nb-Ni-Pt-Ti	1	8	5	3	2	19
Al-Ir-Pt-Sc-Ta	5	10	7	6	7	35
Al-Rh-Sc-Ti-Zn	4	7	4	8	7	30
Al-Nb-Ni-Pt-V	1	9	6	3	2	21
Al-Ir-Pt-Sc-Ti	4	10	8	6	7	35
Al-Rh-Sc-Ti-Zr	7	7	4	8	7	33
Al-Nb-Ni-Pt-W	1	9	7	3	2	22
Al-Nb-Ni-Pt-Zn	1	8	4	3	2	18
Al-Nb-Ni-Pt-Zr	1	9	4	3	2	19
Al-Nb-Ni-Re-Rh	3	7	5	8	7	30
Al-Nb-Ni-Re-Ru	3	3	6	5	7	24
Al-Rh-Sc-Y-Zr	9	7	6	8	7	37
Al-Nb-Ni-Re-Sc	3	2	4	7	8	24
Al-Nb-Ni-Re-Ta	2	2	2	5	6	17
Al-Au-Ge-Pd-Te	8	8	2	4	7	29
Al-Nb-Ni-Re-Ti	1	2	3	4	6	16
Al-Nb-Ni-Re-V	3	2	4	5	6	20
Al-Nb-Ni-Re-W	1	2	5	5	6	19
Al-As-Ni-Os-Re	7	4	4	10	10	35
Al-Nb-Ni-Re-Zn	1	2	2	4	6	15
Al-Ir-Pt-Ta-Ti	2	9	6	3	3	23
Al-Nb-Ni-Re-Zr	3	2	2	4	6	17
Al-Ir-Pt-Ta-V	5	9	7	3	3	27
Al-Ir-Pt-Ta-W	2	9	8	3	3	25
Al-Ir-Pt-Ta-Zr	5	9	5	3	3	25
Al-Nb-Ni-Rh-Ta	2	7	5	7	3	24
Ag-Mg-Sc-Y-Zr	8	2	5	6	5	26
Al-Nb-Ni-Rh-Ti	1	6	6	6	3	22
Al-Nb-Ni-Rh-V	3	6	7	6	3	25
Ag-Mg-Sc-Zn-Zr	7	2	2	6	5	22
Al-Nb-Ni-Rh-W	1	6	8	6	3	24
Al-Ir-Pt-Ti-V	3	9	8	3	3	26
Al-Ir-Pt-Ti-W	1	9	9	3	3	25
Al-Cr-Pt-Re-Ru	4	9	5	6	8	32
Al-Nb-Ni-Rh-Zr	3	6	4	6	3	22
Al-Ir-Pt-Ti-Zr	4	9	6	3	3	25
Al-Nb-Ni-Ru-Sc	3	2	8	6	7	26
Al-Ir-Pt-V-W	3	9	9	3	3	27
Al-Cr-Pt-Re-Ta	2	9	2	6	7	26
Al-Co-Pd-Pt-Ru	7	10	8	4	5	34
Al-Nb-Ni-Ru-Ta	2	2	7	2	4	17
Al-Nb-Ni-Ru-Ti	1	2	7	1	4	15
Al-Nb-Ni-Ru-V	3	2	8	1	4	18
Al-Nb-Ni-Ru-W	1	2	9	1	4	17
Ag-Cd-Hf-Hg-Zr	9	1	1	4	2	17
Al-Cr-Pt-Rh-Ru	4	10	8	7	5	34
Al-Nb-Ni-Ru-Zr	3	2	6	1	4	16
Al-Ir-Re-Rh-Ru	10	8	10	8	8	44
Ag-Au-Cd-Mg-Pd	7	8	1	3	3	22
Al-Ir-Re-Rh-Ta	8	8	6	8	7	37
Al-Ir-Re-Rh-Ti	7	8	7	8	7	37
Al-Cr-Pt-Rh-W	1	10	7	7	4	29
Al-Ir-Re-Rh-W	8	8	9	8	7	40
Ag-Cd-Hf-In-Ti	9	1	1	4	4	19
Al-Ir-Re-Rh-Zr	10	8	5	8	7	38
Al-Nb-Ni-Sc-Ta	2	2	4	6	5	19
Al-Ir-Re-Ru-Sc	10	5	9	7	8	39
Al-Co-Pd-Rh-Ru	9	8	8	7	5	37
Al-Nb-Ni-Sc-Ti	1	1	5	6	5	18
Al-Rh-Ta-Ti-V	4	7	5	7	3	26
Al-Cr-Pt-Ru-V	3	9	7	3	5	27
Al-Ir-Re-Ru-Ta	8	5	8	5	8	34
Al-Nb-Ni-Sc-V	3	1	5	6	5	20
Al-Rh-Ta-Ti-W	2	7	6	7	3	25
Al-Rh-Ta-Ti-Y	2	7	6	7	4	26
Al-Ir-Re-Ru-Ti	7	5	8	5	8	33
Al-Ga-Ir-Mo-Nb	5	3	10	2	2	22
Al-Rh-Ta-Ti-Zn	2	7	3	7	3	22
Al-Nb-Ni-Sc-Y	2	1	7	6	5	21
Al-Ir-Re-Ru-V	9	5	9	5	8	36
Al-Rh-Ta-Ti-Zr	5	7	3	7	3	25
Al-Ir-Re-Ru-W	8	5	10	5	8	36
Al-Rh-Ta-V-W	4	7	7	7	3	28
Al-Nb-Ni-Sc-Zr	3	1	3	6	5	18
Al-Ir-Re-Ru-Zn	8	5	7	5	8	33
Al-Ga-Ir-Mo-Re	9	4	8	5	6	32
Al-Rh-Ta-V-Zn	4	7	3	7	3	24
Al-Ir-Re-Ru-Zr	10	5	7	5	8	35
Al-As-Ni-Re-W	3	2	3	5	6	19
Al-Rh-Ta-V-Zr	8	7	3	7	3	28
Ag-Au-Nb-Pd-Ti	3	8	2	3	3	19
Al-Ga-Ir-Mo-Ta	6	3	8	2	2	21
Al-Rh-Ta-W-Zr	5	7	4	7	3	26
Al-Cu-Sc-Ti-Zr	4	1	1	6	5	17
Al-Ga-Ir-Mo-Ti	5	3	8	2	2	20
Al-Rh-Ta-Y-Zr	6	7	5	7	4	29
Al-Ga-Ir-Mo-V	9	3	9	2	2	25
Ag-Au-Nb-Pd-Zn	3	8	1	3	3	18
Al-Ga-Ir-Mo-W	6	3	10	2	2	23
Al-Rh-Ta-Zn-Zr	5	7	2	7	3	24
Al-Ir-Re-Sc-Ta	8	5	5	7	8	33
Al-Ga-Ir-Nb-Os	7	5	10	9	9	40
Al-Ir-Re-Sc-Ti	7	5	6	7	8	33
Al-Ir-Re-Sc-V	9	5	7	7	8	36
Al-Ir-Re-Sc-W	8	5	8	7	8	36
Al-Ga-Ir-Nb-Re	7	4	10	5	6	32
Al-Nb-Ni-Ta-Ti	1	1	3	2	1	8
Al-Ir-Re-Sc-Zr	10	5	4	7	8	34
Al-Nb-Ni-Ta-V	1	1	4	2	1	9
Al-Co-Cr-Fe-Mo	2	1	1	1	1	6
Al-Ir-Re-Si-Ta	5	4	5	5	6	25
Al-Nb-Ni-Ta-W	1	1	5	2	1	10
Al-Co-Cr-Fe-Ni	1	1	1	1	1	5
Al-Ga-Ir-Nb-Ta	5	3	10	2	2	22
Al-Co-Cr-Fe-Os	3	3	4	8	8	26
Al-Ir-Re-Si-V	6	4	6	5	6	27
Al-Nb-Ni-Ta-Zn	1	1	2	2	1	7
Al-Ir-Re-Si-W	3	4	8	5	6	26
Al-Ga-Ir-Nb-Ti	3	3	10	2	2	20
Al-Co-Cr-Fe-Re	3	2	1	4	6	16
Al-Nb-Ni-Ta-Zr	2	1	2	2	1	8
Al-Ga-Ir-Nb-V	6	3	10	2	2	23
Al-Ga-Ir-Nb-W	4	3	10	2	2	21
Al-Co-Cr-Fe-Ru	3	1	5	1	4	14
Al-Rh-Ti-V-W	3	6	8	6	3	26
Al-Cr-Pt-Ta-V	1	9	3	3	2	18
Al-Cr-Pt-Ta-W	1	9	4	3	3	20
Al-Ga-Ir-Nb-Zr	7	3	9	2	2	23
Ag-Cd-Hf-Mg-Zr	9	1	1	4	2	17
Al-Rh-Ti-V-Zn	3	6	4	6	3	22
Al-Nb-Ni-Ti-V	1	1	5	1	1	9
Al-Rh-Ti-V-Zr	6	6	4	6	3	25
Al-Nb-Ni-Ti-W	1	1	6	1	1	10
Ag-Au-Cd-Nb-Pd	6	8	1	3	3	21
Al-Rh-Ti-W-Zr	3	6	5	6	3	23
Al-Ir-Re-Ta-Ti	5	4	4	5	6	24
Al-Nb-Ni-Ti-Zn	1	1	3	1	1	7
Al-Ge-Re-Ru-V	9	3	8	5	8	33
Al-Ir-Re-Ta-V	8	4	5	5	6	28
Al-Nb-Ni-Ti-Zr	1	1	3	1	1	7
Al-Rh-Ti-Y-Zr	5	6	5	6	3	25
Al-Ir-Re-Ta-W	5	4	6	5	6	26
Al-Nb-Ni-V-W	1	1	7	1	1	11
Al-Rh-Ti-Zn-Zr	4	6	2	6	3	21
Al-Ir-Re-Ta-Zn	5	4	3	5	6	23
Al-Co-Pd-Ta-V	7	5	3	3	2	20
Al-Ir-Re-Ta-Zr	8	4	3	5	6	26
Al-Nb-Ni-V-Zn	1	1	3	1	1	7
Al-Cr-Pt-V-W	1	9	6	3	2	21
Al-Nb-Ni-V-Zr	3	1	3	1	1	9
Al-Nb-Ni-Y-Zr	2	1	5	1	1	10
Al-Ir-Re-Ti-V	6	4	6	5	6	27
Al-Ir-Re-Ti-W	3	4	7	5	6	25
Al-Ir-Re-Ti-Zn	4	4	3	5	6	22
Al-Ga-Ir-Os-Ta	8	6	10	9	9	42
Al-Ir-Re-Ti-Zr	7	4	4	5	6	26
Al-Cr-Re-Rh-Ti	3	7	3	8	7	28
Al-Ga-Ir-Os-V	9	5	10	9	9	42
Al-Ir-Re-V-W	7	4	8	5	6	30
Al-Ir-Re-V-Zn	7	4	4	5	6	26
Al-Nb-Os-Pd-Pt	4	10	8	9	9	40
Al-Ir-Re-V-Zr	9	4	4	5	6	28
Al-Ge-Re-Ta-V	8	2	3	5	8	26
Al-Nb-Os-Pd-Re	7	6	7	10	10	40
Al-Ir-Re-W-Zn	4	4	6	5	6	25
Al-Nb-Os-Pd-Rh	7	8	9	10	9	43
Al-Ir-Re-W-Zr	8	4	6	5	6	29
Al-Nb-Os-Pd-Ru	7	6	10	9	10	42
Ag-Al-Cd-Ga-Zn	6	1	2	2	2	13
Al-Cr-Re-Ru-Ta	5	3	3	5	8	24
Al-Nb-Os-Pd-Sc	7	6	8	10	10	41
Al-Co-Pt-Re-Ru	7	9	7	6	8	37
Al-Cr-Re-Ru-Ti	3	2	4	5	7	21
Al-Nb-Os-Pd-Ta	5	6	7	9	9	36
Al-Cr-Re-Ru-V	6	3	5	5	7	26
Al-Cr-Re-Ru-W	4	2	6	5	7	24
Al-Co-Pt-Re-Ta	5	9	3	6	7	30
Al-Cu-Ta-Ti-V	1	1	1	2	1	6
Al-Cr-Re-Ru-Zn	4	2	3	5	7	21
Al-Nb-Os-Pd-V	6	6	8	9	9	38
Al-Co-Pt-Re-Ti	3	9	4	6	7	29
Al-Nb-Os-Pd-W	3	6	9	9	9	36
Al-Co-Pt-Re-V	6	9	4	6	7	32
Al-Cu-Ta-Ti-Zn	1	1	1	1	1	5
Al-Co-Pt-Re-W	3	9	6	6	7	31
Al-Cu-Ta-Ti-Zr	2	1	1	1	1	6
Al-Nb-Os-Pd-Zr	7	6	6	9	9	37
Al-Ir-Rh-Ru-Ti	7	7	10	7	5	36
Al-Nb-Os-Pt-Re	4	10	8	10	10	42
Al-Ir-Rh-Ru-V	9	8	10	7	5	39
Al-Co-Pt-Rh-Ru	7	10	9	7	5	38
Al-Nb-Os-Pt-Rh	4	10	10	10	9	43
Ag-Au-Cd-Pb-Pd	7	8	1	3	3	22
Al-Ir-Rh-Ru-W	8	8	10	7	5	38
Al-Nb-Os-Pt-Ru	4	10	10	9	10	43
Al-Nb-Os-Pt-Sc	4	10	9	10	10	43
Al-Nb-Os-Pt-Si	1	9	9	9	9	37
Al-Cr-Re-Sc-W	4	2	4	7	8	25
Ag-Au-Cd-Pb-Sb	6	8	1	1	2	18
Al-Ir-Rh-Ru-Zr	10	8	9	7	5	39
Al-Nb-Os-Pt-Ta	2	10	8	9	9	38
Ag-Au-Nb-Ti-Zn	1	8	1	1	2	13
Al-Cr-Re-Si-Ta	2	2	1	5	6	16
Al-Nb-Os-Pt-Ti	1	9	9	9	9	37
Al-Nb-Os-Pt-V	3	10	9	9	9	40
Al-Nb-Os-Pt-W	1	9	10	9	9	38
Al-Cr-Re-Si-V	3	2	2	4	6	17
Al-Cr-Re-Si-W	1	2	3	4	6	16
Al-Nb-Os-Pt-Zn	1	9	8	9	9	36
Al-Nb-Os-Pt-Zr	4	9	8	9	9	39
Al-Nb-Os-Re-Rh	7	8	9	10	10	44
Al-Nb-Os-Re-Ru	7	5	10	10	10	42
Al-Nb-Os-Re-Sc	7	5	8	10	10	40
Al-Co-Pt-Ru-V	6	9	9	3	5	32
Al-Nb-Os-Re-Si	3	4	8	10	10	35
Al-Cr-Re-Ta-Ti	2	2	1	5	6	16
Al-Co-Pt-Ru-W	3	9	9	3	5	29
Al-Ir-Rh-Sc-Ta	8	8	8	8	7	39
As-Au-Mg-Pb-Pd	4	8	2	3	3	20
Ag-Au-Cd-Pd-Pt	7	10	1	4	4	26
Al-Cr-Re-Ta-V	4	2	1	5	6	18
Al-Nb-Os-Re-Ta	5	5	6	10	10	36
Al-Cr-Re-Ta-W	2	2	2	5	6	17
Al-Ir-Rh-Sc-Ti	7	7	9	8	7	38
Al-Cr-Re-Ta-Zn	2	2	1	5	6	16
Al-Nb-Os-Re-Ti	3	4	7	10	10	34
Al-Cr-Re-Ta-Zr	5	2	1	5	6	19
Al-Nb-Os-Re-V	6	5	8	10	10	39
Al-Ga-Ir-Re-Ta	8	4	8	5	6	31
Al-Co-Cr-Ir-Mo	5	3	5	1	1	15
Al-Nb-Os-Re-W	4	4	9	10	10	37
Al-Cu-Ti-V-Zn	1	1	1	1	1	5
Al-Co-Cr-Ir-Ni	3	3	5	1	1	13
Al-Ga-Ir-Re-Ti	7	4	9	5	6	31
Ag-Cd-Hf-Pd-Sc	10	6	1	7	7	31
Al-Nb-Os-Re-Zn	4	4	6	10	10	34
Al-Co-Cr-Ir-Os	7	5	9	9	9	39
Al-Cu-Ti-V-Zr	3	1	1	1	1	7
Al-Ga-Ir-Re-V	9	4	9	5	6	33
Al-Ru-Sc-Ta-Ti	5	3	6	6	7	27
Al-Nb-Os-Re-Zr	7	5	6	10	10	38
Al-Ga-Ir-Re-W	8	4	10	5	6	33
Al-Cr-Re-Ti-V	3	2	2	4	6	17
Al-Co-Cr-Ir-Pt	3	9	7	3	3	25
Al-Ir-Rh-Sc-Zr	10	7	7	8	7	39
Al-Ru-Sc-Ta-V	8	3	7	6	7	31
Al-Nb-Os-Rh-Ru	7	8	10	10	10	45
Al-Co-Cr-Ir-Re	7	4	5	5	6	27
Ag-Hf-Nb-Ti-Zn	3	1	1	4	1	10
Al-Cr-Re-Ti-W	1	2	3	4	6	16
Ag-Hf-Nb-Ti-Zr	6	1	1	4	1	13
Al-Co-Cr-Ir-Ru	7	4	9	1	5	26
Al-Nb-Os-Rh-Sc	7	8	10	10	10	45
Al-Cr-Re-Ti-Zn	1	1	1	4	6	13
Al-Ru-Sc-Ta-Zr	8	3	5	6	7	29
Al-Cr-Re-V-W	3	2	4	5	6	20
Al-Nb-Os-Rh-Ta	5	8	9	10	9	41
Ag-Au-Cd-Pd-Te	9	8	1	4	4	26
As-Au-Mg-Pd-Sb	7	8	3	3	3	24
Ag-Hf-Nb-Zn-Zr	6	1	1	4	1	13
Al-Nb-Os-Rh-Ti	3	7	9	10	9	38
Al-Co-Cr-Ir-V	6	3	7	1	1	18
Al-Co-Cr-Ir-W	3	3	8	1	1	16
Al-Nb-Os-Rh-V	6	7	10	10	9	42
Al-Cr-Re-W-Zr	4	2	2	4	6	18
Al-Nb-Os-Rh-W	4	7	10	10	9	40
As-Au-Mg-Pd-Sn	4	8	2	3	3	20
Ag-Cd-Hf-Pd-Zr	10	5	1	5	3	24
Al-Ru-Sc-Ti-V	6	2	8	6	7	29
Al-Nb-Os-Rh-Zr	7	7	8	10	9	41
As-Au-Mg-Pd-Te	8	8	2	4	4	26
Al-As-Os-Re-V	9	4	6	10	10	39
Al-Nb-Os-Ru-Sc	7	5	10	10	10	42
Al-Ru-Sc-Ti-Zr	7	2	5	6	7	27
Al-Nb-Os-Ru-Si	3	4	10	8	9	34
Al-Nb-Os-Ru-Ta	5	5	10	9	10	39
As-Au-Mg-Pd-Zn	4	8	2	3	3	20
Al-Ir-Rh-Ta-Ti	5	7	7	7	4	30
Al-Nb-Os-Ru-Ti	3	4	10	8	9	34
Al-Ru-Sc-V-Zr	9	2	6	6	7	30
Al-Ir-Rh-Ta-V	8	7	8	7	4	34
Al-Nb-Os-Ru-V	6	5	10	8	9	38
Al-Ir-Rh-Ta-W	5	7	9	7	4	32
Al-Nb-Os-Ru-W	4	4	10	8	9	35
Al-Co-Cr-Mn-Os	3	3	5	8	8	27
Al-Nb-Os-Ru-Zn	4	4	9	8	9	34
Al-Co-Pt-Ta-Ti	1	9	4	3	3	20
Al-Nb-Os-Ru-Zr	7	4	9	8	9	37
Al-Co-Pt-Ta-V	4	9	5	3	3	24
Al-Ir-Rh-Ta-Zr	8	7	6	7	4	32
Al-Co-Pt-Ta-W	2	9	6	3	3	23
Al-As-Os-Ru-V	9	4	9	8	9	39
Al-Ir-Rh-Ti-V	6	7	8	6	4	31
Al-Nb-Os-Sc-Ta	5	5	8	10	10	38
Al-Ir-Rh-Ti-W	3	7	9	6	4	29
Al-Co-Cr-Mo-Ni	2	1	2	1	1	7
Al-Co-Cr-Mo-Os	5	3	5	8	8	29
Al-Nb-Os-Sc-Ti	3	4	9	10	10	36
Al-Nb-Os-Sc-V	6	4	9	10	10	39
Al-Co-Cr-Mo-Pt	2	8	3	3	2	18
Al-Co-Cr-Mo-Re	5	2	1	4	6	18
Al-Nb-Os-Sc-W	4	4	10	10	10	38
Al-Nb-Os-Sc-Y	5	4	10	10	10	39
Al-Co-Cr-Mo-Ru	5	1	5	1	4	16
Al-Ir-Rh-Ti-Zr	7	7	6	6	4	30
Al-Nb-Os-Sc-Zr	7	4	7	10	10	38
Al-Co-Pt-V-W	3	9	8	3	2	25
Al-Nb-Os-Si-V	3	3	9	8	8	31
Al-Nb-Os-Si-W	1	3	10	8	8	30
Al-Ru-Si-V-W	3	2	9	1	4	19
Al-Co-Cr-Nb-Os	3	3	8	8	8	30
Al-Co-Cr-Nb-Re	3	2	4	4	6	19
Al-Cr-Rh-Ta-V	4	7	4	7	3	25
Al-Ir-Rh-Y-Zr	9	7	9	7	4	36
Al-Co-Cr-Nb-Ta	1	1	4	2	1	9
Al-Nb-Os-Ta-Ti	2	4	7	9	8	30
Ag-Pb-Pd-Pt-Te	7	10	1	4	4	26
Al-Nb-Os-Ta-V	4	4	8	9	8	33
Al-Co-Cr-Nb-V	2	1	6	1	1	11
Al-Nb-Os-Ta-W	2	4	9	9	8	32
Al-Ga-Ir-Ta-Ti	5	3	9	2	2	21
Al-Nb-Os-Ta-Zn	2	4	6	9	8	29
Al-Ga-Ir-Ta-V	8	3	9	2	2	24
Al-Cr-Rh-Ti-V	3	6	4	6	3	22
Al-Co-Cr-Ni-Os	3	3	5	8	8	27
Al-Ga-Ir-Ta-W	5	3	10	2	2	22
Al-Nb-Os-Ta-Zr	5	4	6	9	8	32
Al-Cr-Rh-Ti-W	1	6	6	6	3	22
Al-Au-Hf-Mo-Ti	2	8	1	4	2	17
As-Au-Mg-Sb-Te	7	8	3	2	3	23
Al-Co-Re-Ru-Sc	10	3	7	7	8	35
Al-Co-Cr-Ni-Pt	1	8	3	3	2	17
Al-Co-Cr-Ni-Re	3	2	2	4	6	17
Al-Co-Cr-Ni-Ru	3	1	5	1	4	14
Al-Co-Re-Ru-Ti	6	2	6	5	7	26
Al-Nb-Os-Ti-V	3	3	9	8	8	31
Ag-Cd-Hf-Sc-Zr	10	2	1	7	6	26
Al-Co-Re-Ru-V	9	3	7	5	7	31
Al-Nb-Os-Ti-W	1	3	9	8	8	29
Al-Co-Re-Ru-W	7	2	8	5	8	30
Al-Nb-Os-Ti-Zn	1	3	7	8	8	27
Al-Co-Re-Ru-Zn	7	2	5	5	7	26
Al-Nb-Os-Ti-Zr	3	3	7	8	8	29
Al-Ga-Ir-Ti-V	6	3	10	2	1	22
Al-Nb-Os-V-W	3	3	10	8	8	32
Al-Ga-Ir-Ti-W	3	3	10	2	2	20
Al-Co-Cr-Ni-V	2	1	3	1	1	8
Al-Co-Cr-Ni-W	1	1	4	1	1	8
Al-Nb-Os-V-Zn	3	3	7	8	8	29
Al-Nb-Os-V-Zr	6	3	7	8	8	32
Al-Au-Hf-Nb-Pd	4	8	1	5	3	21
Al-Nb-Os-W-Zn	1	3	8	8	8	28
Al-Nb-Os-W-Zr	4	3	8	8	8	31
Al-Ga-Ir-V-W	7	3	10	2	2	24
Al-Co-Cr-Os-Re	7	4	5	10	10	36
Al-Co-Cr-Os-Ru	7	4	9	8	9	37
Al-Nb-Os-Zn-Zr	4	3	5	8	8	28
Al-Ru-Ta-Ti-V	4	2	6	2	4	18
Al-Ru-Ta-Ti-W	2	2	7	2	4	17
Al-Ru-Ta-Ti-Zn	2	2	4	2	4	14
Al-Co-Cr-Os-V	6	3	7	8	8	32
Al-Ru-Ta-Ti-Zr	5	2	4	2	4	17
Al-Co-Cr-Os-W	3	3	8	8	8	30
Al-Au-Hf-Nb-Sn	1	8	1	4	2	16
Al-Ru-Ta-V-W	4	2	8	2	4	20
Al-Au-Hf-Nb-Ta	2	8	1	4	2	17
Al-Ru-Ta-V-Zn	4	2	4	2	4	16
Ag-Cd-Hf-Ti-Zn	6	1	1	4	2	14
Al-Ru-Ta-V-Zr	8	2	4	2	4	20
Al-Au-Hf-Nb-Ti	1	8	2	4	2	17
Ag-Cd-Hf-Ti-Zr	9	1	1	4	2	17
Al-Ru-Ta-W-Zr	5	2	6	2	4	19
Al-Ir-Ru-Ta-Ti	5	4	8	2	5	24
Al-Au-Hf-Nb-Zn	1	8	1	4	2	16
Ag-Au-Cd-Sc-Zr	10	8	1	6	6	31
Al-Ir-Ru-Ta-V	8	4	9	2	5	28
Al-Au-Hf-Nb-Zr	4	8	1	4	2	19
Al-Ir-Ru-Ta-W	5	4	10	2	5	26
Al-Co-Re-Ta-V	7	2	3	5	6	23
Ag-Cd-Hf-Zn-Zr	9	1	1	4	2	17
Al-Co-Re-Ta-W	4	2	4	5	6	21
Ag-Cd-Hg-In-Mg	7	1	5	2	4	19
Al-Ir-Ru-Ta-Zr	8	4	7	2	5	26
Al-Cr-Ru-Ta-Ti	2	2	4	2	4	14
Al-Cr-Ru-Ta-V	4	2	5	2	4	17
Al-Co-Cr-Pt-Re	3	9	3	6	7	28
Al-Co-Cr-Pt-Ru	3	9	7	3	5	27
Al-Co-Re-Ti-W	3	2	5	4	6	20
Al-Ir-Ru-Ti-V	6	4	9	1	5	25
Al-Ru-Ti-V-W	3	2	9	1	4	19
Al-Co-Cr-Pt-Ta	2	9	3	3	3	20
Al-Ir-Ru-Ti-W	3	4	10	1	5	23
Al-Ru-Ti-V-Zn	3	2	5	1	4	15
Al-Co-Cr-Pt-V	3	8	5	3	2	21
Al-Ru-Ti-V-Zr	6	2	5	1	4	18
Al-Cr-Ru-Ti-V	3	2	6	1	4	16
Al-Co-Cr-Pt-W	1	8	6	3	2	20
Al-Cr-Ru-Ti-W	1	2	7	1	4	15
Al-Ir-Ru-Ti-Zr	7	4	8	1	5	25
Al-Ru-Ti-W-Zr	3	2	7	1	4	17
Al-Ir-Ru-V-W	7	4	10	1	5	27
Al-Co-Cr-Re-Ru	7	2	5	5	7	26
Al-Cr-Ru-V-W	3	2	8	1	4	18
Al-Ir-Ru-V-Zr	9	4	8	1	5	27
Al-Ru-V-W-Zr	7	2	7	1	4	21
Al-Ir-Ru-W-Zr	8	4	9	1	5	27
Al-Fe-Ga-Mn-V	3	1	4	2	1	11
Al-Fe-Ga-Mo-Nb	2	1	6	2	1	12
Al-Fe-Ga-Mo-Os	5	3	7	9	8	32
Al-Fe-Ga-Mo-Re	5	2	3	5	6	21
Al-Fe-Ga-Mo-Ta	2	1	3	2	1	9
Al-Fe-Ga-Mo-Ti	2	1	4	2	1	10
Al-Fe-Ga-Mo-V	5	1	4	2	1	13
Al-Co-Cr-Ru-W	3	2	8	1	4	18
Ag-Cd-Hg-Mg-Sn	3	1	4	2	2	12
Al-Fe-Ga-Nb-Os	3	3	9	9	8	32
Al-Fe-Ga-Nb-Re	3	2	6	5	6	22
Al-Fe-Ga-Nb-Ta	2	1	6	2	1	12
Al-Fe-Ga-Nb-W	1	1	9	2	1	14
Al-Nb-Pd-Pt-Re	4	10	4	6	7	31
Al-Fe-Ga-Ni-Os	3	3	7	9	8	30
Al-Co-Rh-Ta-V	7	7	6	7	3	30
Al-Nb-Pd-Pt-Sc	4	10	6	6	7	33
Al-Nb-Pd-Pt-Ta	2	10	4	4	3	23
Al-Nb-Pd-Pt-Ti	1	10	5	4	3	23
Al-Au-Hf-Pd-Ta	5	8	1	5	3	22
Al-Fe-Ga-Os-Re	7	4	7	10	10	38
Al-Nb-Pd-Pt-V	3	10	6	4	3	26
Al-Fe-Ga-Os-Ru	7	4	10	9	9	39
Al-Nb-Pd-Pt-W	1	10	7	4	3	25
Al-Ge-Ta-V-W	4	1	6	2	5	18
Al-Au-Hf-Pd-Ti	4	8	1	5	3	21
Al-Fe-Ga-Os-V	6	3	9	9	8	35
Al-Nb-Pd-Pt-Zr	4	10	4	4	3	25
Al-Nb-Pd-Re-Rh	7	8	5	8	7	35
Al-Ir-Sc-Ta-Ti	5	4	6	6	6	27
Al-Ir-Sc-Ta-V	8	4	7	6	6	31
Al-Nb-Pd-Re-Ru	7	6	7	5	8	33
Al-Au-Hf-Pd-Zn	4	8	1	5	3	21
Al-Ir-Sc-Ta-W	5	4	8	6	6	29
Al-Co-Cu-Fe-Os	3	3	3	8	8	25
Al-Ir-Sc-Ta-Y	6	4	8	6	6	30
Al-Au-Hf-Pd-Zr	8	8	1	5	3	25
Al-Ga-Mg-Pd-Ti	3	5	8	4	2	22
Al-Cr-Si-Ta-W	1	1	4	1	1	8
Al-Ir-Sc-Ta-Zr	8	4	4	6	6	28
Al-Nb-Pd-Re-Ta	5	6	3	5	7	26
Al-Nb-Pd-Re-Ti	3	6	3	5	7	24
Al-Ga-Mg-Pd-Zn	4	5	7	4	2	22
Al-Nb-Pd-Re-V	6	6	4	5	7	28
Al-Ir-Sc-Ti-V	6	4	7	6	6	29
Al-Ir-Sc-Ti-W	3	3	9	6	6	27
Al-Cr-Si-V-W	1	1	5	1	1	9
Al-Nb-Pd-Re-Zr	7	6	2	5	7	27
Al-Ir-Sc-Ti-Y	5	3	9	6	6	29
Al-Nb-Pd-Rh-Ru	7	8	9	7	5	36
Al-Ir-Sc-Ti-Zr	7	3	5	6	6	27
Al-Nb-Pd-Rh-Sc	7	8	7	8	7	37
Al-Nb-Pd-Rh-Ta	5	8	5	7	4	29
Al-Ir-Sc-V-Zr	9	4	6	6	6	31
Al-Nb-Pd-Rh-Ti	3	8	6	7	4	28
Al-Nb-Pd-Rh-V	6	8	7	7	4	32
Al-Nb-Pd-Rh-W	3	8	8	7	4	30
Al-Ir-Sc-Y-Zr	9	4	8	6	6	33
Al-Nb-Pd-Rh-Zr	7	8	5	7	4	31
Ag-Au-Pb-Sb-Sn	3	8	1	1	2	15
Al-Ir-Si-Ta-Ti	1	3	6	2	2	14
Al-Nb-Pd-Ru-Ta	5	6	7	3	5	26
Al-Ir-Si-Ta-W	2	3	8	2	2	17
Al-Co-Ru-V-W	6	2	9	1	4	22
Al-Nb-Pd-Ru-V	6	6	8	2	5	27
Al-Cr-Ta-Ti-V	1	1	2	2	1	7
Al-Cr-Ta-Ti-W	1	1	3	1	1	7
Al-Fe-Ga-Re-Ta	5	2	3	5	6	21
Al-Cr-Ta-Ti-Zn	1	1	1	1	1	5
Al-Fe-Ga-Re-Ti	3	2	4	5	6	20
Al-Cr-Ta-V-W	1	1	4	2	1	9
Al-Fe-Ga-Re-V	6	2	4	5	6	23
Al-Cr-Ta-V-Zn	1	1	1	2	1	6
Al-Cr-Ta-W-Zr	2	1	2	1	1	7
Al-Ir-Si-Ti-W	1	3	8	1	1	14
Al-Ir-Si-V-W	3	3	9	1	1	17
Al-Nb-Pd-Sc-Ta	5	6	4	6	6	27
Al-Nb-Pd-Sc-Ti	3	6	5	6	6	26
Al-Cr-Ti-V-W	1	1	5	1	1	9
Al-Nb-Pd-Sc-Zn	4	6	4	6	6	26
Al-Cr-Ti-W-Zr	1	1	3	1	1	7
Al-Nb-Pd-Sc-Zr	7	6	4	6	6	29
Al-Nb-Pd-Sn-Ta	2	5	2	3	2	14
Al-Nb-Pd-Sn-Ti	1	5	3	2	2	13
Al-Nb-Pd-Ta-Te	5	5	3	4	3	20
Al-Nb-Pd-Ta-Ti	1	5	3	3	2	14
Al-Nb-Pd-Ta-V	4	5	4	3	2	18
Al-Nb-Pd-Ta-W	2	5	6	3	2	18
Al-Sc-Ta-Ti-V	4	2	3	6	5	20
Al-Sc-Ta-Ti-W	2	2	5	6	5	20
Al-Nb-Pd-Ta-Zn	2	5	2	3	2	14
Al-Au-Hf-Sc-Ti	4	8	1	7	6	26
Al-Nb-Pd-Ta-Zr	5	5	2	3	2	17
As-Au-Mo-Nb-Pd	6	8	2	3	3	22
Al-Sc-Ta-Ti-Zr	5	2	2	6	5	20
Al-Co-Sc-Ta-Ti	4	2	4	6	5	21
Al-Ir-Ta-Ti-V	4	3	6	2	2	17
Al-Co-Sc-Ta-V	7	2	4	6	5	24
As-Au-Mo-Nb-Rh	6	10	4	7	4	31
Al-Ir-Ta-Ti-W	2	3	7	2	2	16
Al-Fe-Ga-Ta-Ti	1	1	4	2	1	9
Al-Au-Hf-Sc-Y	5	8	2	7	6	28
Al-Ir-Ta-Ti-Y	2	3	7	2	2	16
Al-Fe-Ga-Ta-V	4	1	5	2	1	13
Al-Co-Sc-Ta-Zr	8	2	2	6	5	23
Al-Fe-Ga-Ta-W	2	1	6	2	1	12
Al-Ir-Ta-Ti-Zn	2	3	4	2	2	13
Ag-Au-Pd-Pt-Zn	4	10	1	4	4	23
Al-Ir-Ta-Ti-Zr	5	3	4	2	2	16
Al-Au-Hf-Sc-Zr	8	8	1	7	6	30
Al-Nb-Pd-Ti-V	3	5	5	2	2	17
Al-Nb-Pd-Ti-W	1	5	6	2	2	16
Al-Ir-Ta-V-W	4	3	8	2	2	19
Al-Ir-Ta-V-Zn	4	3	4	2	2	15
Al-Ir-Ta-V-Zr	8	3	4	2	2	19
Al-Nb-Pd-Ti-Zn	1	5	3	2	2	13
As-Au-Mo-Ni-Pd	6	8	1	3	3	21
Al-Fe-Ga-Ti-V	3	1	5	2	1	12
Al-Nb-Pd-Ti-Zr	3	5	3	2	2	15
Al-Nb-Pd-V-W	3	5	7	2	2	19
Al-Ir-Ta-W-Zr	5	3	6	2	2	18
Al-Nb-Pd-V-Zn	3	5	3	2	2	15
Al-Fe-Ga-V-W	3	1	8	2	1	15
As-Au-Mo-Ni-Ta	3	8	1	2	2	16
Al-Nb-Pd-V-Zr	6	5	3	2	2	18
Al-Ir-Ta-Y-Zr	6	3	6	2	2	19
Al-Sc-Ti-V-W	3	1	6	6	5	21
As-Au-Mo-Ni-V	5	8	1	1	2	17
Al-Sc-Ti-V-Zr	6	1	3	6	5	21
Al-Nb-Pd-Y-Zr	5	5	5	2	2	19
Al-Ga-Mn-Mo-Nb	2	1	6	2	1	12
Al-Sc-Ti-W-Zr	3	1	4	6	5	19
Al-Nb-Pd-Zn-Zr	4	5	2	2	2	15
Al-Ga-Mn-Mo-Os	6	3	7	9	8	33
Al-Au-Hf-Ta-Ti	2	8	1	4	2	17
Al-Sc-Ti-Y-Zr	5	1	4	6	5	21
Al-Nb-Pt-Re-Rh	4	10	7	8	7	36
Al-Nb-Pt-Re-Ru	4	9	8	6	8	35
Al-Ga-Mn-Mo-Re	6	2	3	5	6	22
Al-Nb-Pt-Re-Sc	4	9	6	7	8	34
Al-Au-Hf-Ta-Zn	2	8	1	4	2	17
Al-Au-Hf-Ta-Zr	5	8	1	4	2	20
Al-Ga-Mn-Mo-Ta	3	1	3	2	1	10
Al-Nb-Pt-Re-Ta	2	9	4	6	7	28
Al-Ga-Mn-Mo-Ti	2	1	4	2	1	10
Al-Nb-Pt-Re-Ti	1	9	5	6	7	28
Al-Ga-Mn-Mo-V	5	1	5	2	1	14
Al-Ga-Mn-Mo-W	2	1	6	2	1	12
Al-Nb-Pt-Re-V	3	9	6	6	7	31
As-Au-Mo-Pd-Pt	6	10	1	4	4	25
Al-Nb-Pt-Re-W	1	9	7	6	7	30
Al-Au-Hf-Ti-V	3	8	1	4	2	18
As-Au-Mo-Pd-Rh	9	10	2	7	4	32
Al-Ga-Mn-Nb-Os	3	3	10	9	8	33
Al-Nb-Pt-Re-Zn	1	9	3	6	7	26
Al-Nb-Pt-Re-Zr	4	9	3	6	7	29
Ag-Cd-In-Mg-Sn	6	1	2	2	4	15
Al-Ga-Mn-Nb-Pt	1	9	8	4	2	24
Al-Au-Hf-Ti-Zn	1	8	1	4	2	16
Al-Nb-Pt-Rh-Ru	4	10	10	7	5	36
As-Au-Mo-Pd-Ta	6	8	1	3	3	21
Al-Ga-Mn-Nb-Re	3	2	6	5	6	22
Al-Ir-Ti-V-W	3	3	9	1	1	17
Al-Au-Hf-Ti-Zr	4	8	1	4	2	19
As-Au-Mo-Pd-V	9	8	1	3	3	24
Al-Ir-Ti-V-Zn	3	3	5	1	1	13
Ag-As-Hg-Mg-Pd	6	5	6	3	2	22
Al-Ir-Ti-V-Zr	6	3	5	1	1	16
Al-Au-Hf-V-Zn	3	8	1	4	2	18
Al-Nb-Pt-Rh-Ta	2	10	7	7	4	30
Ag-Cd-In-Mg-Zn	7	1	2	2	4	16
Al-Ir-Ti-W-Zn	1	3	7	1	1	13
Al-Ir-Ti-W-Zr	3	3	7	1	1	15
Al-Nb-Pt-Rh-Ti	1	10	8	7	4	30
Ag-Bi-Pd-Pt-Rh	9	10	6	7	4	36
Al-Nb-Pt-Rh-V	3	10	8	7	4	32
Al-Ga-Mn-Nb-W	1	1	9	2	1	14
Al-Ir-Ti-Y-Zr	5	3	7	1	2	18
Al-Nb-Pt-Rh-W	1	10	9	7	4	31
Al-Si-Ta-V-W	1	1	5	2	1	10
Al-Ga-Mn-Ni-Os	3	3	8	9	8	31
Al-Au-Hf-Zn-Zr	4	8	1	4	2	19
Al-Ir-V-W-Zr	7	3	7	1	1	19
Al-Nb-Pt-Rh-Zr	4	10	6	7	4	31
Al-As-Re-Ru-V	9	3	6	5	8	31
Al-Nb-Pt-Ru-Ta	2	9	8	3	5	27
Al-Co-Ta-Ti-V	3	1	4	2	1	11
Al-Nb-Pt-Ru-Ti	1	9	9	3	5	27
As-Au-Mo-Rh-Ta	6	10	2	7	4	29
Al-Nb-Pt-Ru-V	3	9	9	3	5	29
Al-Co-Cu-Mo-Ni	2	1	1	1	1	6
Al-Nb-Pt-Ru-W	1	9	10	3	5	28
Al-Co-Ta-Ti-Zr	4	1	2	1	1	9
Al-Co-Ta-V-W	3	1	6	2	1	13
Al-Cu-Fe-Ir-Os	4	5	6	8	9	32
Al-Co-Ta-V-Zr	7	1	2	2	1	13
Al-Cu-Fe-Ir-Ru	4	4	6	1	5	20
Al-Ga-Mn-Os-Re	7	4	7	10	10	38
Al-Ga-Mn-Os-V	6	3	9	9	8	35
Ag-Au-Pd-Ta-Zn	4	8	1	3	3	19
Al-Nb-Pt-Sc-Ta	2	9	6	6	6	29
Ag-Hf-Pd-Sc-Zn	9	6	1	7	6	29
Al-Nb-Pt-Sc-Ti	1	9	7	6	6	29
Al-Nb-Pt-Sc-V	3	9	7	6	6	31
Al-Nb-Pt-Sc-Y	2	9	9	6	6	32
Al-Nb-Pt-Sc-Zn	1	9	5	6	6	27
Al-Co-Ti-V-Zr	6	1	3	1	1	12
Ag-Au-Pd-Te-Zn	7	8	1	4	4	24
Al-Nb-Pt-Sc-Zr	4	9	5	6	6	30
Al-Co-Cu-Ni-Os	3	3	4	8	8	26
Al-Co-Cu-Ni-Re	3	2	1	4	6	16
Al-Co-Cu-Ni-Ru	3	1	4	1	4	13
Al-Cu-Fe-Mn-Ni	1	1	1	1	1	5
Al-Nb-Pt-Sn-Ti	1	8	4	3	2	18
Al-Cu-Fe-Mn-Os	1	3	2	8	8	22
Al-Fe-Ge-Mn-V	3	1	2	1	5	12
Al-Nb-Pt-Ta-Ti	1	9	5	3	2	20
Al-Nb-Pt-Ta-V	1	9	6	3	2	21
Al-Nb-Pt-Ta-W	1	9	7	3	3	23
Al-Co-Cu-Os-Ru	7	4	8	8	9	36
Al-Fe-Ge-Mo-Ta	2	1	2	1	5	11
Al-Nb-Pt-Ta-Zn	1	9	4	3	2	19
Al-Nb-Pt-Ta-Zr	2	9	4	3	2	20
Al-Cu-Fe-Mo-Ni	1	1	1	1	1	5
Al-Fe-Ge-Mo-V	5	1	2	1	5	14
Al-Ga-Mn-Pt-Ta	2	9	5	4	3	23
Al-Cu-Fe-Mo-Pt	1	8	1	3	2	15
Al-Ga-Mn-Pt-Ti	1	8	6	4	2	21
Ag-Hf-Pd-Ti-Zr	9	5	1	5	2	22
Al-Nb-Pt-Ti-V	1	9	7	3	2	22
Al-Nb-Pt-Ti-W	1	9	8	3	2	23
Al-Nb-Pt-Ti-Y	1	9	8	3	2	23
Al-Nb-Pt-Ti-Zn	1	8	4	3	2	18
Al-Nb-Pt-Ti-Zr	1	9	4	3	2	19
Al-Ga-Mn-Re-Ta	5	2	3	5	6	21
Al-Ta-Ti-V-W	1	1	5	2	1	10
Al-Nb-Pt-V-W	1	9	9	3	2	24
Al-Cu-Fe-Nb-Ni	1	1	1	1	1	5
Al-Ta-Ti-V-Zn	1	1	2	2	1	7
Al-Ga-Mn-Re-Ti	3	2	4	5	6	20
Al-Ta-Ti-V-Zr	4	1	2	2	1	10
Al-Nb-Pt-V-Zn	1	9	5	3	2	20
Al-Ga-Mn-Re-V	6	2	5	5	6	24
Ag-Hf-Pd-Zn-Zr	9	5	1	5	2	22
Al-Nb-Pt-V-Zr	3	9	5	3	2	22
Al-Ga-Mn-Re-W	4	2	6	5	6	23
Al-Ta-Ti-W-Zn	1	1	3	1	1	7
Al-Ta-Ti-W-Zr	2	1	3	2	1	9
Al-Ta-Ti-Zn-Zr	2	1	1	1	1	6
Al-Nb-Pt-Y-Zr	2	9	7	3	2	23
Al-Nb-Pt-Zn-Zr	1	9	3	3	2	18
Al-Ta-V-W-Zr	4	1	3	2	1	11
Al-Nb-Re-Rh-Ru	7	7	9	8	8	39
Al-Nb-Re-Rh-Sc	7	7	7	8	8	37
Al-Cu-Fe-Ni-Os	1	3	2	8	8	22
Al-Cu-Fe-Ni-Pd	1	5	1	2	2	11
Al-Hf-Hg-Ti-Zr	4	1	3	4	1	13
Al-Nb-Re-Rh-Ta	5	7	5	8	7	32
Al-Cu-Fe-Ni-Re	1	1	1	4	6	13
Al-Nb-Re-Rh-Ti	3	7	6	8	7	31
Al-Cu-Fe-Ni-Ru	1	1	2	1	4	9
Al-Nb-Re-Rh-V	6	7	7	8	7	35
Al-Nb-Re-Rh-W	4	7	8	8	7	34
Al-Nb-Re-Rh-Zr	7	7	4	8	7	33
Al-Fe-Ge-Os-V	6	4	7	8	10	35
Al-Nb-Re-Ru-Sc	7	3	8	7	8	33
Al-Nb-Re-Ru-Si	3	3	8	5	7	26
Ag-Pd-Pt-Rh-Te	10	10	3	7	4	34
Al-Nb-Re-Ru-Ta	5	3	6	5	8	27
Al-Nb-Re-Ru-Ti	3	3	7	5	7	25
Al-Ti-V-W-Zr	3	1	4	1	1	10
Al-Cu-Fe-Os-Pd	4	6	2	9	9	30
Al-Nb-Re-Ru-V	6	3	8	5	7	29
Al-Cu-Fe-Os-Pt	1	9	3	9	9	31
Al-Cu-Fe-Os-Re	4	4	2	10	10	30
Al-Nb-Re-Ru-W	4	3	9	5	8	29
Al-Cu-Fe-Os-Ru	4	4	6	8	9	31
Al-Nb-Re-Ru-Zn	4	2	6	5	7	24
As-Au-Nb-Pd-Pt	4	10	3	4	4	25
Al-Nb-Re-Ru-Zr	7	3	6	5	7	28
As-Au-Nb-Pd-Rh	8	10	4	7	4	33
As-Au-Nb-Pd-Ta	5	8	2	3	3	21
As-Au-Nb-Pd-V	7	8	3	3	3	24
Al-Nb-Re-Sc-Ta	5	3	4	7	8	27
Al-Nb-Re-Sc-Ti	3	2	5	7	8	25
As-Au-Bi-Cd-Pb	8	8	1	1	3	21
Al-Nb-Re-Sc-V	6	2	5	7	8	28
As-Au-Bi-Cd-Pd	10	8	2	3	3	26
Al-Nb-Re-Sc-W	4	2	7	7	8	28
As-Au-Bi-Cd-Sb	9	8	2	1	3	23
Al-Nb-Re-Sc-Zr	7	2	3	7	8	27
Al-Ga-Mn-Ta-V	4	1	5	2	1	13
Al-Nb-Re-Si-Ta	2	2	4	5	6	19
Al-Ga-Mn-Ta-W	2	1	6	2	1	12
Al-Hf-In-Mg-Pd	7	5	3	5	4	24
Al-Nb-Re-Si-V	3	2	5	5	6	21
Al-Nb-Re-Si-W	1	2	7	5	6	21
Al-Fe-Ge-Re-Ta	5	2	2	5	8	22
Al-Fe-Ge-Re-V	6	2	3	4	8	23
Al-Ga-Mn-Ti-W	1	1	7	2	1	12
Al-Nb-Re-Ta-Ti	2	2	3	5	6	18
Al-Nb-Re-Ta-V	4	2	4	5	6	21
Al-Ga-Mn-V-W	3	1	8	2	1	15
Al-Nb-Re-Ta-W	2	2	5	5	6	20
Al-Nb-Re-Ta-Zn	2	2	2	5	6	17
Al-Nb-Re-Ta-Zr	5	2	2	5	6	20
Al-Ga-Mo-Nb-Os	5	3	10	9	8	35
Al-Ga-Mo-Nb-Pd	5	5	7	4	2	23
Al-Nb-Re-Ti-V	3	2	5	5	6	21
Al-Ga-Mo-Nb-Pt	2	9	8	4	2	25
Al-Nb-Re-Ti-W	1	2	6	5	6	20
Al-Ga-Mo-Nb-Re	5	2	7	5	6	25
Al-Nb-Re-Ti-Zn	1	2	3	4	6	16
Al-Nb-Re-Ti-Zr	3	2	3	4	6	18
Al-Nb-Re-V-W	3	2	7	5	6	23
Al-Ga-Mo-Nb-Ta	2	1	7	2	1	13
Al-Nb-Re-V-Zr	6	2	3	5	6	22
Al-Nb-Re-W-Zn	1	2	4	5	6	18
Al-Ga-Mo-Nb-Ti	2	1	7	2	1	13
Al-Nb-Re-W-Zr	4	2	4	5	6	21
Al-Ga-Mo-Nb-V	5	1	8	2	1	17
Al-Ga-Mo-Nb-W	2	1	9	2	1	15
Ag-Cu-Nb-Pd-Zn	3	5	1	2	2	13
Al-Hf-In-Nb-Pd	7	5	3	5	4	24
Al-Ga-Mo-Ni-Os	5	3	8	9	8	33
Al-Nb-Rh-Ru-Ta	5	7	9	7	5	33
Al-Nb-Rh-Ru-Ti	3	7	9	6	5	30
Al-Hf-In-Nb-Ti	3	1	3	4	3	14
Al-Nb-Rh-Ru-V	6	7	10	6	5	34
Al-Nb-Rh-Ru-W	4	7	10	6	5	32
Al-Ga-Mo-Ni-Ta	2	1	4	2	1	10
Al-Fe-Ge-Ta-W	2	1	4	2	5	14
Al-Nb-Rh-Ru-Zr	7	7	8	6	5	33
Al-Ga-Mo-Ni-Ti	2	1	4	2	1	10
Al-Ga-Mo-Os-Re	9	4	8	10	10	41
Al-Ga-Mo-Os-Ru	9	4	10	9	9	41
Al-Fe-Ge-V-W	3	1	6	1	5	16
Al-Nb-Rh-Sc-Ta	5	7	7	8	7	34
Al-Ga-Mo-Os-Ta	6	4	8	9	8	35
Al-Ga-Mo-Os-Ti	5	3	8	9	8	33
Al-Nb-Rh-Sc-Ti	3	7	8	8	7	33
Al-Ga-Mo-Os-V	9	3	9	9	8	38
Al-Mg-Mo-Os-Ru	6	4	10	8	9	37
Al-Nb-Rh-Sc-V	6	7	8	8	7	36
Al-Ga-Mo-Os-W	6	3	10	9	8	36
Al-Nb-Rh-Sc-W	4	7	9	8	7	35
Al-Nb-Rh-Sc-Y	5	7	9	8	7	36
Al-Nb-Rh-Sc-Zr	7	7	6	8	7	35
[truncated: 28,202 more rows]
